# Supplementary material for: Characterizing nucleotide variation and expansion dynamics in human-specific variable number tandem repeats
Source: HighWire-hosted journal article supplement (doi:10.1101/gr.275560.121), 2021-07-09
Supplement: Supplemental_Table_S1.xlsx [file Supplemental_Table_S1.xlsx]

## Sheet: Sheet1
Supplemental Table 1. Genomic coordinates and characteristics of all 467 VNTRs studied.
VNTR Characteristics							VNTR Location				VNTR Length in Long-Read Genomes									VNTR in Ancient Genomes		VNTR Length in Trios				VNTR Function
Nearest Gene	Chromosome	Coordinates (GRCh38)	Repeat motif	Motif size	Repeat Length	Repeat Copy Number	Distance to Nearest Gene	Exon Overlap	5' UTR Overlap	3' UTR Overlap	Avg Length from Long-Read	HG00514_h0 Total Length	HG00514_h1 Total Length	HG00733_h0 Total Length	HG00733_h1 Total Length	NA19240_h0 Total Length	NA19240_h1 Total Length	yoruban_hsa Total Length	chm13_hsa Total Length	Neander kmer matches	Denisovan kmer matches	Ratio child:parent Mean	Ratio child:parent Standard Deviation	Ratio child:parentMin.	Ratio child:parentMax.	GWAS Chromosome	GWAS Start	GWAS End	GWAS Cytoband	GWAS Gene	GWAS Phenotype
C1orf159	chr1	chr1:1075853-1079425	GGGGACTCCGTGGGGGGAGGCTGAGGCTAT	30	3572	119.067	2326	0	0	0	2938	3643	4192	3724	3559	NA	1231	2418	1799	209	147	1.03512	0.266303	0.49576	2.01344	chr1	1070426	1070426	1p36.33	AL390719.1 - RNF223	Body mass index
KCNN3	chr1	chr1:154713961-154714648	GTGTGGTGTGT	11	687	62.4545	0	0	0	0	2873.57	2866	2865	2860	2880	2878	NA	2875	2891	820	410	0.99553	0.0838305	0.838446	2.02709	chr1	154713065	154713065	1q21.3	KCNN3	Alzheimer's disease in APOE e4- carriers
MUC1	chr1	chr1:155188676-155192051	GGTGGAGCCCGGGGCCGGCCTGGTGTCCGGGGCCGAGGTGACACCGTGGGCTGGGGGGGC	60	2195	36.5833	0	118,163,26,308,383,567,748	0	0	2582.12	2252	2252	2256	4348	2828	2400	2001	2320	104	9	1.05591	0.232733	0.573875	2.04698	chr1	155192276	155192276	1q22	MUC1	Esophageal cancer and gastric cancer,Gastric cancer,Magnesium levels,Non-cardia gastric cancer,Serum uric acid levels,Urinary albumin-to-creatinine ratio,Urinary albumin-to-creatinine ratio in non-diabetics
SMG7	chr1	chr1:183477420-183477799	ATGTGTGCATATGTGTATATATGCATATATAC	32	379	11.8438	0	0	0	0	361.75	336	404	367	341	370	370	368	338	34	52	1.02705	0.271592	0.515699	1.88096	chr1	183490535	183490535	1q25.3	SMG7	General cognitive ability
LOC107985242	chr1	chr1:194303499-194303958	ATGTATTATATATTTGTACATATATAAATATATTCTT	37	459	12.4054	0	0	0	0	793.375	864	864	762	796	762	707	727	865	75	12	0.974671	0.294155	0.514181	1.94778	chr1	194290328	194290328	1q31.3	AL356272.1 - AL513348.1	Bone ultrasound measurement (broadband ultrasound attenuation)
HHAT	chr1	chr1:210653882-210654223	TGTGACAGGGAATAG	15	341	22.7333	0	0	0	0	4087	5164	5162	5164	3628	3587	2796	3535	3660	0	0	0.991932	0.0639588	0.799141	1.28604	chr1	210621464	210621464	1q32.2	HHAT, HHAT	Ankylosing spondylitis
CNIH4	chr1	chr1:224378517-224378915	CTGAGGCCTAGAGATCGTTCAGGGTGTTGTAACTGGGAACATCTGAATG	49	398	8.12245	0	212	0	212	581.375	594	594	690	495	839	496	594	349	110	123	1.00273	0.282927	0.504379	1.80172	chr1	224394506	224394506	1q42.11	WDR26	White blood cell count
DNAH14	chr1	chr1:225335513-225336105	ATATATACATATATGCATATATACATATATGT	32	592	18.5	0	0	0	0	578.25	600	630	578	506	602	602	602	506	196	199	1.03682	0.265944	0.52018	2.05209	chr1	225370787	225370787	1q42.12	DNAH14	Feeling nervous
ITPKB	chr1	chr1:226797603-226798412	AAGGAGGAGGTAATGGGTCCTGTCTCTCCTGATCTTCAC	39	809	20.7436	58236	0	0	0	468.875	464	464	464	464	464	464	464	503	132	171	0.978424	0.273335	0.526191	1.99484	chr1	226789330	226789330	1q42.12	RPS27P5 - PSEN2	Clostridium difficile infection in multiple myeloma
ADCK3	chr1	chr1:226955313-226957281	ACTCTCCCTGGCTCCCACTCTCCCTGGCTCCCACTCTCCCTGGTTCACTCTCCCTGGCTCCC	62	1968	31.7419	0	0	0	0	2062	2058	2059	2061	2077	2060	2061	2059	2061	0	0	1.02442	0.293973	0.495994	2.0087	chr1	226953002	226953002	1q42.13	COQ8A	Highest math class taken
SLC35F3	chr1	chr1:234247311-234248571	GTTGGTTGGCTGGTCCATTGTTTGGTGG	28	1260	45	0	0	0	0	1696.75	1707	1706	1708	1624	1706	1707	1708	1708	61	33	1.02497	0.20654	0.584849	1.7429	chr1	234251482	234251482	1q42.2	SLC35F3	Interleukin-6 levels
ACTN2	chr1	chr1:236713594-236715065	CTGTGTGTTTATGTATACACAGATACCACTGAAGGGATATGCAAGAGACTGATAGCTTCATTCCTCA	67	1471	21.9552	0	0	0	0	5648.62	6591	7313	4355	3545	5084	4089	3865	10347	1262	543	1.00398	0.165729	0.555913	1.78689	chr1	236748757	236748757	1q43	ACTN2	Periodontitis (CDC/AAP)
PLCH2	chr1	chr1:2440391-2440733	CCTCTCTCCATGTCTGTCGCTGGCCTTGCCCGGCCCGCCCGGGGATCTTGCATTGCTGCGACCAGGGAT	69	342	4.95652	0	0	0	0	1462.75	1090	1570	1976	1714	956	1710	956	1730	549	111	1.02012	0.105937	0.716877	1.58216	chr1	2448840	2448840	1p36.32	PLCH2	Myopia (age of diagnosis)
C1orf101	chr1	chr1:244486252-244487314	GGAGTACTCGTGGGCCAGGTGTAGACCCTCGTAGTCACCTGGTGGGTGGTCCAGCATGT	59	1062	18	0	0	0	0	1039.38	1060	1003	1003	1062	1001	1062	1062	1062	19	21	0.991677	0.288777	0.478357	2.10949	chr1	244441734	244441734	1q44	ADSS	Dementia and core Alzheimer's disease neuropathologic changes
SMYD3	chr1	chr1:246387836-246389890	AAAGCATTCATTCTTGAAAATCACCTCGAGGTTGAAGTCAGTTTCTGGGGACCTCCTTGTAG	62	2054	33.129	0	0	0	0	1917.75	1135	1740	1735	2544	2065	2153	1792	2178	424	184	0.9808	0.180058	0.540071	1.98599	chr1	246280780	246280780	1q44	SMYD3	Systemic lupus erythematosus
SMYD3	chr1	chr1:246483932-246485337	ACCTGAAAACACATCACTTCAACCAAAATACCTAAACCATTGCACTAGTTAC	52	1405	27.0192	0	0	0	0	1418.75	1353	1402	1561	1457	1353	1395	1268	1561	64	77	0.992142	0.264427	0.509874	2.12988	chr1	246497934	246497934	1q44	SMYD3	Obesity-related traits
LOC107984934	chr1	chr1:29770530-29771802	TATATATTTATATATAAAACATATATGTGAA	31	1272	41.0323	81556	0	0	0	1926.12	1897	2031	2077	1948	1969	1835	1780	1872	23	9	1.01339	0.111429	0.683077	1.53949	chr1	29792805	29792805	1p35.3	AL645944.2 - AL645944.1	Pediatric non-alcoholic fatty liver disease activity score
SERINC2	chr1	chr1:31431749-31432232	GATAGGGTG	9	483	53.6667	0	0	0	0	4664.14	NA	2147	4494	4381	6214	4817	5365	5231	836	667	0.99083	0.191095	0.518474	1.71438	chr1	31425616	31425616	1p35.2	SERINC2	Blood protein levels
PRDM16	chr1	chr1:3167538-3168370	CCTCCCAGCGCCTCTGTGGCATCGCCCCCTGCTCCTGCCATCCTCCCGCCCCACCCCTG	59	832	14.1017	0	0	0	0	904.875	788	832	1211	830	831	830	831	1086	163	29	1.00474	0.210603	0.58298	1.74623	chr1	3168622	3168622	1p36.32	PRDM16	Headache
PRDM16	chr1	chr1:3180841-3181978	CTTACACACGCAGTCTTACACACGGT	26	1137	43.7308	0	0	0	0	1538.12	2064	1109	1131	2079	1286	2065	1286	1285	34	100	0.988239	0.156959	0.60272	1.76509	chr1	3186748	3186748	1p36.32	PRDM16	Migraine
PRDM16	chr1	chr1:3379108-3380113	CACCCCTCCCAACA	14	1005	71.7857	0	0	0	0	1004.25	933	1015	1013	1013	1004	1032	1005	1019	338	122	1.03402	0.29094	0.509298	2.10015	chr1	3384243	3384243	1p36.32	PRDM16	Allergic rhinitis
LRP8	chr1	chr1:53283423-53284302	ACTTACCTACTACATACCCGGGCCGCTT	28	879	31.3929	0	0	0	0	1502	1345	2344	1256	1263	895	1561	1736	1616	532	268	1.01006	0.216901	0.565905	1.88505	chr1	53275125	53275125	1p32.3	LRP8	Educational attainment (years of education)
MIR4689	chr1	chr1:5832249-5832358	GCTGGGG	7	109	15.5714	30214	0	0	0	757.375	841	841	908	827	540	706	553	843	199	44	1.00415	0.108107	0.719026	1.68382	chr1	5853561	5853561	1p36.31	AL365255.1 - MIR4689	Response to taxane treatment (placlitaxel)
ACOT7	chr1	chr1:6307615-6308737	GGCAGAGGGAACAGCAACA	19	1122	59.0526	0	0	0	0	1117.12	1119	1114	1122	1122	1103	1119	1116	1122	42	42	1.00927	0.226679	0.565956	1.70687	chr1	6239763	6239763	1p36.31	LINC00337 - HES3	QT interval
SLC45A1	chr1	chr1:8331248-8331471	AAAAAATATTTTTAAAAAACACTTTTAAAAATATTTTTAAAA	42	223	5.30952	0	0	0	0	433.5	397	486	347	431	380	506	383	538	1647	127	1.00528	0.110498	0.610583	1.64709	chr1	8329994	8329994	1p36.23	SLC45A1	Schizophrenia
RERE	chr1	chr1:8375499-8375837	AGCCACTGAAAATGCTTCCTCACTCAGC	28	338	12.0714	0	0	0	0	351.25	366	389	338	337	338	366	338	338	135	75	0.989867	0.0541242	0.799695	1.17579	chr1	8371547	8371547	1p36.23	RERE	Depressed affect,Feeling miserable
FAM41C	chr1	chr1:875830-876434	CCCCACACTC	10	604	60.4	0	0	0	0	2957.29	2634	4904	3509	3053	2824	NA	2246	1531	332	94	0.966816	0.0897143	0.668545	1.29355	chr1	845017	845017	1p36.33	LINC01128	Morning vs. evening chronotype
LOC105376409	chr10	chr10:11365270-11367067	GAGCTGAGTTGTGGTGTAGGGTCATGCATGGATTAA	36	1797	49.9167	10194	0	0	0	988.75	968	972	971	972	972	1080	1075	900	28	18	0.989631	0.0539338	0.80846	1.18188	chr10	11367209	11367209	10p14	CELF2 - AC026887.1	Plantar warts
SHTN1	chr10	chr10:117126439-117126789	CCTAGCACGCATGCCCCTCGCCTCGCCT	28	350	12.5	65	0	0	0	454.625	459	427	462	434	442	378	461	574	203	37	1.00202	0.0614995	0.777582	1.22876	chr10	117133720	117133720	10q25.3	VAX1	Nonsyndromic cleft lip with cleft palate
C10orf120	chr10	chr10:122680712-122682128	TCAGACCTTTTACCTCTGTCAACCATGGTTTTCTCATGTGTGAACTGGAGATAGAAACA	59	1416	24	15647	0	0	0	1429.25	1416	1593	1354	1416	1416	1412	1411	1416	75	110	1.00543	0.10796	0.674897	1.52748	chr10	122731524	122731524	10q26.13	DMBT1P1	Adolescent idiopathic scoliosis
LOC105378536	chr10	chr10:124226028-124228987	GGAATACTGTGT	12	2959	246.583	75815	0	0	0	3787.75	3771	3788	3770	3801	3800	3799	3801	3772			1.00362	0.0548006	0.849456	1.17917	chr10	124241230	124241230	10q26.13	CHST15 - OAT	Diastolic blood pressure
C10orf90	chr10	chr10:126672435-126672913	CAGGACTGGTCATCAGCTACCCCGAGAC	28	478	17.0714	1299	0	0	0	681.25	666	912	655	945	448	589	580	655	292	177	1.00465	0.108871	0.657463	1.5317	chr10	126685138	126685138	10q26.2	C10orf90 - RF00271	Sitting height ratio
DOCK1	chr10	chr10:126947245-126948462	TGATGGTGGTGGTTGGTAGTATTACTGTTGGTGG	34	1217	35.7941	0	0	0	0	4855.75	NA	NA	NA	2683	3797	NA	3088	9855			1.00564	0.13706	0.481355	1.44783	chr10	126973570	126973570	10q26.2	DOCK1	3-hydroxy-1-methylpropylmercapturic acid levels in smokers
TCERG1L	chr10	chr10:131176217-131177220	TGCACACACCAAGACACA	18	1003	55.7222	0	0	0	0	2177.62	2174	2198	2198	2180	2143	2188	2142	2198	0	0	1.02765	0.109015	0.71066	1.66895	chr10	131203676	131203676	10q26.3	TCERG1L	Lung cancer in ever smokers
LINC01164	chr10	chr10:131622967-131625011	GAGAGGTGGGG	11	2044	185.818	147315	0	0	0	2067.57	1714	NA	1643	2175	2243	2115	2257	2326	421	114	0.987652	0.10061	0.717112	1.30644	chr10	131674181	131674181	10q26.3	TCERG1L - LINC01164	Adolescent idiopathic scoliosis
JAKMIP3	chr10	chr10:132158608-132161914	CCTGTGTGATGCTGGGGGGGCCTCTC	26	3306	127.154	0	0	0	0	3750.83	3695	NA	3618	3543	NA	3137	4722	3790	89	23	1.01798	0.0734701	0.730674	1.27825	chr10	132144257	132144257	10q26.3	JAKMIP3	Chronic obstructive pulmonary disease-related biomarkers
STK32C	chr10	chr10:132267526-132269084	TGTGTATGCAGGTTCAGCTCTATGCTGCTGTGTGCATGCATGTCCCACATCGTGTGTGTGTGTGTCGGTGTGTGTGCATGCA	82	1558	19	0	0	0	0	1564	1558	1557	1550	1632	1556	1550	1551	1558	54	65	1.0209	0.0615426	0.80456	1.17879	chr10	132276246	132276246	10q26.3	STK32C	Adolescent idiopathic scoliosis
LRRC27	chr10	chr10:132388168-132388881	GGTGTCTGGGTAGGAGGTGCCCCTCTCCCTGGTGGATTTGG	41	713	17.3902	7011	0	0	0	1650.71	NA	1577	1577	1520	1769	1701	1649	1762	0	0	1.01571	0.0749602	0.780611	1.23762	chr10	132391851	132391851	10q26.3	LRRC27 - PWWP2B	Neuroticism
KNDC1	chr10	chr10:133222410-133224054	TGTGTGTGAGAGCCCATCCAGGCATGCTCTTCCCGGCGTGTGTG	44	1644	37.3636	0	0	0	0	971	946	946	946	1252	940	896	896	946	41	163	1.01449	0.0916392	0.722091	1.28413	chr10	133163573	133163573	10q26.3	KNDC1	Educational attainment (years of education)
ADARB2	chr10	chr10:1340064-1341897	CAGCATCCACCAGAGAACCACGTGCCCCACAGCGGCAATAAC	42	1833	43.6429	0	0	0	0	2073.75	1707	2418	2083	2085	2211	2072	2159	1855	30	14	1.00768	0.0599699	0.786203	1.26453	chr10	1326501	1326501	10p15.3	ADARB2	Adolescent idiopathic scoliosis
ADARB2	chr10	chr10:1438147-1440227	GCAGGTCCTTCACTATGGGGCTCCTGAGTCTCCTCAGCGGATGGAG	46	2080	45.2174	0	0	0	0	2044	2074	1982	2035	2035	2078	2079	2080	1989	148	118	0.99508	0.0620276	0.796571	1.26487	chr10	1442527	1442527	10p15.3	ADARB2	Strep throat
ADARB2	chr10	chr10:1592231-1593427	CATGGTCCCCTCTGTCACCCAGCTTCCCTCGCCCAAGCCACCCTCCATAGGTCTCCTCTCTGG	63	1196	18.9841	0	0	0	0	1398.88	1438	1380	1385	1385	1385	1385	1385	1448	5	16	1.01486	0.11437	0.707372	1.64639	chr10	1594941	1594941	10p15.3	ADARB2	Blood pressure (smoking interaction)
ADARB2	chr10	chr10:1616350-1617831	GCTAGATGTTTGTGTGCCCGTCCAGACACACTCCACACCGCCCTGCTGAGCTCTGCATCCTGGGAACTGGCCTCAGAGGGTTGCATTCTGTC	92	1481	16.0978	0	0	0	0	1907.75	1481	1478	1481	1850	3055	1849	1850	2218	48	58	1.0086	0.107312	0.669428	1.46673	chr10	1634336	1634336	10p15.3	ADARB2	Quantitative traits
ADARB2	chr10	chr10:1699162-1701939	GCAATCCCACTCCACCGGGAGACCAGGCGCTCGCCAATACAC	42	2777	66.119	0	0	0	0	1100.5	1048	1048	1258	1258	1048	1048	1048	1048	101	74	1.00611	0.068033	0.757602	1.21834	chr10	1689677	1689677	10p15.3	ADARB2	Menarche (age at onset)
MALRD1	chr10	chr10:19315003-19315799	TATATAATTATATATATATTA	21	796	37.9048	0	0	0	0	1076.62	1277	883	1188	1212	831	1180	857	1185	47	4	0.985447	0.0960899	0.729634	1.32325	chr10	19350875	19350875	10p12.31	MALRD1	Plasma factor VII activating protease levels
DIP2C	chr10	chr10:336813-337968	TGTGGAGGCCTAGGCAGCTGTGTGTGTGTGTGT	33	1155	35	0	0	0	0	1254.83	1264	1264	NA	NA	1260	1250	1264	1227	62	28	1.00427	0.0544398	0.856902	1.23076	chr10	378205	378205	10p15.3	DIP2C	Neuroticism
DIP2C	chr10	chr10:400764-404172	AATCCTGTGATTTTACATGTGTGGTAGCATTAGCATTACTCTTCCTTATGGACAAGTTTGGTATGTGTTCATCAGCACATG	81	3408	42.0741	0	0	0	0	1876.17	1793	1793	NA	NA	2036	1794	1804	2037	136	114	0.991031	0.0746471	0.691673	1.18466	chr10	378205	378205	10p15.3	DIP2C	Neuroticism
UCN3	chr10	chr10:5369864-5370936	TGTGTGTGTATA	12	1072	89.3333	0	0	0	0	1866.33	1471	3179	NA	NA	1048	1444	1407	2649	588	196	1.00495	0.0760286	0.77189	1.2854	chr10	5359496	5359496	10p15.1	AL683826.1 - UCN3	Growth-regulated protein alpha levels
ANK3	chr10	chr10:60468974-60469697	TATATATATATATACCACTTTTAG	24	723	30.125	0	0	0	0	1564.5	1500	1325	1567	1745	1532	1630	1534	1683	279	25	1.00056	0.111929	0.690462	1.64103	chr10	60462349	60462349	10q21.2	ANK3	Autism spectrum disorder, attention deficit-hyperactivity disorder, bipolar disorder, major depressive disorder, and schizophrenia (combined)
ITIH5	chr10	chr10:7628668-7629627	TGTGTCCATGTTGTAGCG	18	959	53.2778	0	0	0	0	1086.14	1185	958	958	NA	1047	1204	1204	1047	321	277	0.991636	0.0552564	0.844909	1.18978	chr10	7610458	7610458	10p14	ITIH5	Blood protein levels
KCNMA1	chr10	chr10:77519835-77520333	TGAGGGTATGCAGTG	15	498	33.2	0	0	0	0	823.875	822	822	822	822	822	822	822	837	113	134	0.988083	0.0572079	0.817732	1.17893	chr10	77493503	77493503	10q22.3	KCNMA1	Educational attainment
GRID1	chr10	chr10:86121295-86121616	TCATCATCACCATCATCATCA	21	321	15.2857	0	0	0	0	836.625	840	840	840	840	822	840	831	840	74	108	1.01848	0.104897	0.700228	1.57112	chr10	86087202	86087202	10q23.1	GRID1	Cardiac structure and function
LOC107984285	chr10	chr10:975671-977012	TGTGGACCCGGCCTAGTAGAAGGTAGGCCTGTCGTGTAATG	41	1341	32.7073	0	0	0	0	1319.12	1299	1300	1341	1300	1340	1300	1332	1341	148	125	0.995202	0.0638654	0.725725	1.39921	chr10	947789	947789	10p15.3	AL359878.2 - AL359878.1	Eosinophil counts,Eosinophil percentage of white cells
CRTAC1	chr10	chr10:97900437-97901203	TTGGACCCCGTAGCCCCTTTTCCTGGTAGTGA	32	766	23.9375	0	0	0	0	901.875	1196	762	985	986	765	765	766	990	167	107	0.993438	0.0577962	0.814642	1.14863	chr10	97913426	97913426	10q24.2	CRTAC1	Lung cancer in never smokers
CD3G	chr11	chr11:118355234-118355827	TATATACA	8	593	74.125	1987	0	0	0	565.375	552	576	595	594	553	581	543	529	228	254	1.00477	0.0691834	0.828282	1.24066	chr11	118371280	118371280	11q23.3	UBE4A	Fat distribution (HIV)
TECTA	chr11	chr11:121185261-121186203	TAGGGAAAGCAGATGTTCAATGCTTAATGAATGAG	35	942	26.9143	0	0	0	0	2212	1904	1904	1702	2125	2956	2634	2567	1904	1314	528	1.0045	0.122131	0.537442	1.58851	chr11	121146015	121146015	11q23.3	TECTA	Alzheimer's disease (late onset)
SORL1	chr11	chr11:121480539-121482037	CATCTCCTCCTCCCCAGCTCCTCCCCTAGTGCACAGATACCTATAGGCAGGCTC	54	1498	27.7407	0	0	0	0	1632.25	1606	1660	1660	1660	1497	1660	1655	1660	17	32	0.986467	0.0620039	0.790249	1.17638	chr11	121564878	121564878	11q24.1	SORL1	Alzheimer's disease (late onset),Alzheimer's disease in APOE e4- carriers,Alzheimer's disease or family history of Alzheimer's disease,Maternal history of Alzheimer's disease
CDON	chr11	chr11:126065034-126065257	ATAGTATTAAGAGGTG	16	223	13.9375	1660	0	0	0	733.625	573	1110	801	819	426	673	556	911	329	292	1.01139	0.109842	0.699521	1.63811	chr11	126035363	126035363	11q24.2	CDON	Alzheimer's disease (late onset)
NTM	chr11	chr11:131865743-131866216	CACACACACATGCTA	15	473	31.5333	0	0	0	0	482.375	488	488	488	473	473	488	473	488	274	273	0.989375	0.0603154	0.810042	1.2063	chr11	131859504	131859504	11q25	NTM	Reaction time
OPCML	chr11	chr11:133545853-133547110	GCCTCCTCCCCTGTGCA	17	1257	73.9412	13372	0	0	0	1279.88	1257	1254	1257	1257	1388	1257	1312	1257	97	36	1.01221	0.109043	0.630893	1.61277	chr11	133522399	133522399	11q25	OPCML	Amyotrophic lateral sclerosis (sporadic)
NCAPD3	chr11	chr11:134164542-134168010	ACACTCACTTGTGAGATGAGCTTGGGGGAGCTGC	34	3468	102	0	0	0	0	3222.57	3458	3067	3137	3472	NA	3137	3145	3142	688	407	1.00689	0.0658402	0.811831	1.21285	chr11	134151964	134151964	11q25	NCAPD3, JAM3	Blood protein levels
LOC105369584	chr11	chr11:134827334-134828140	TGTATATATGTGTGTG	16	806	50.375	111998	0	0	0	1118.25	785	804	824	822	1436	1433	1384	1458	187	281	0.997032	0.0722062	0.757847	1.29931	chr11	134868376	134868376	11q25	AP001999.1 - AP003062.1	Tooth agenesis (mandibular third molar)
LOC105369586	chr11	chr11:134926488-134930058	CATAGTTGATTGTTAACCAGTGTTGAGGCAGGTGGT	36	3570	99.1667	21271	0	0	0	2957.86	NA	3454	3570	3570	2236	2166	2139	3570	294	312	0.988434	0.0759799	0.787031	1.21436	chr11	134893177	134893177	11q25	AP001999.1 - AP003062.1	Urinary tract infection frequency
LOC100507548	chr11	chr11:134974795-134975768	GGTGCAGGGAGAAAGAACAGTCCAC	25	973	38.92	9547	0	0	0	978	993	973	982	970	993	967	973	973	370	167	0.989139	0.0649799	0.739205	1.23494	chr11	135046122	135046122	11q25	AP003062.2 - AP005135.1	Alcoholic chronic pancreatitis
LOC105369587	chr11	chr11:135039916-135042672	CCTGAGTCGGCATCTCCCCGTCACCAGGTGTGT	33	2756	83.5152	29743	0	0	0	2167.5	1909	2818	1765	2756	1916	1710	1710	2756	195	138	0.992714	0.0754834	0.806527	1.20872	chr11	135046122	135046122	11q25	AP003062.2 - AP005135.1	Alcoholic chronic pancreatitis
BRSK2	chr11	chr11:1393854-1395013	CCTGGAGATGGGCCATGGAGATGGGTCCTGGAGATGGGCCTGGAGATGGGCCCTGGAGATGGGTCCTGGAGATGGGTCCTGGAGATGGGT	90	1159	12.8778	0	0	0	0	1115	NA	1158	868	1128	1276	1126	1156	1093	353	377	1.01256	0.0750929	0.76603	1.64058	chr11	1404375	1404375	11p15.5	BRSK2	Heroin dependence
SPON1	chr11	chr11:14252256-14252748	AGACCTGCGCAGAGTGTGGGAATCCAGCGCTATGTACTTGCCTCAGCCGAAGGCA	55	492	8.94545	0	0	0	0	498.875	492	492	492	492	547	492	492	492	42	20	0.988461	0.0582719	0.838332	1.16425	chr11	14255453	14255453	11p15.2	SPON1	HDL cholesterol levels
LOC388572	chr11	chr11:186208-187042	AGACCGGAACCCTAAAATGATAGTTACTGAGAATACTGCTAATGCCCTA	49	834	17.0204	0	0	0	0	790.5	833	NA	829	586	831	830	834	NA	42	63	1.00315	0.116477	0.648269	1.53675	chr11	193863	193863	11p15.5	SCGB1C1, BET1L	Mean platelet volume
INS-IGF2	chr11	chr11:2161570-2161976	CTGTCCCCACACCC	14	406	29	270	0	0	0	1055.71	591	602	498	1943	744	NA	1007	2005	518	95	1.02991	0.119927	0.67758	1.64171	chr11	2160994	2160994	11p15.5	INS, INS-IGF2	Type 1 diabetes
ART1	chr11	chr11:3653753-3654824	CCCATCAGACATCAAGTCTTGTAAATTCCACCTCCTACCTCTGTCTATCCTCACTGCCATTCT	63	1071	17	0	0	0	0	8624.14	NA	7786	17528	1386	1449	10065	1447	20708	855	108	1.00224	0.348171	0.200068	1.96901	chr11	3653650	3653650	11p15.4	ART1	DNA methylation variation (age effect)
LRRC56	chr11	chr11:530405-531236	CTGGAGAGAAGGGGGAGTGTGGCGTCCC	28	831	29.6786	0	0	0	0	1320.38	1818	1909	829	1306	1244	1026	1152	1279	311	272	1.02337	0.0901801	0.732541	1.29774	chr11	494662	494662	11p15.5	RNH1	Body mass index
PHRF1	chr11	chr11:585209-585670	GCCCTTTCCAGCTTGAGGTAGTA	23	461	20.0435	0	0	0	0	2594	1261	NA	5483	4999	1465	1456	1475	2019	833	996	1.00023	0.1189	0.640593	1.30492	chr11	589564	589564	11p15.5	PHRF1	Systemic lupus erythematosus
CD5	chr11	chr11:61099190-61101723	CACATCAACATGGAGATCACACACA	25	2533	101.32	957	0	0	0	2778.14	2878	NA	2876	2876	2632	2654	2653	2878	913	918	1.00534	0.0728171	0.844664	1.97661	chr11	61066571	61066571	11q12.2	AP003721.2	Systolic blood pressure x smoking status (current vs non-current) interaction (2df test),Systolic blood pressure x smoking status (ever vs never) interaction (2df test)
PLA2G16	chr11	chr11:63615021-63615415	TATATATGTGTG	12	394	32.8333	0	0	0	0	416.857	462	387	398	NA	383	411	404	473	176	82	1.00982	0.0597467	0.843614	1.21298	chr11	63552521	63552521	11q12.3	RARRES3 - HRASLS2	Serum uric acid levels
SART1	chr11	chr11:65970739-65971661	GGATGGTGGGATTCATGAGCTGAGGAGGGGGATGGTGGGATTCAGGAGCTGAGGAGGG	58	922	15.8966	0	0	0	0	1860.14	2483	1234	1368	NA	1928	2352	1864	1792	286	159	0.987164	0.0751468	0.797249	1.24116	chr11	65961206	65961206	11q13.1	TSGA10IP - SART1	Heel bone mineral density
LINC01488	chr11	chr11:69497878-69498952	TGCAGGTATAGGTGGAGGGG	20	1074	53.7	4242	0	0	0	1360	1379	1381	1380	1381	1377	1300	1301	1381	157	125	0.997721	0.0595469	0.822872	1.19335	chr11	69492927	69492927	11q13.3	LINC01488	Breast cancer (early onset)
FLJ42102	chr11	chr11:71403472-71404255	CCTTCTCTGAGCCTCCATCT	20	783	39.15	1740	0	0	0	794.143	782	783	782	863	NA	783	783	783	268	169	1.00831	0.0637933	0.851267	1.21181	chr11	71422087	71422087	11q13.4	AP002387.1	Vitamin D levels
CLPB	chr11	chr11:72268478-72269103	TATTATATAA	10	625	62.5	23284	0	0	0	494.143	605	603	374	625	NA	373	387	492	0	0	1.00881	0.112208	0.673995	1.57183	chr11	72273354	72273354	11q13.4	AP000593.2 - AP000593.1	Heart rate response to recovery post exercise (10 sec)
PDDC1	chr11	chr11:772178-772428	GGAGCCTCCGACCTCACCTCTGGCTGTGATGGGGGAGGACAGAGCAGGGAGCACAGCGTGCCTCGGCCTCCAGGCACTCACCCT	84	250	2.97619	0	88	0	87	208.875	168	249	250	168	167	333	168	168	9	14	1.01131	0.069867	0.814454	1.21333	chr11	772701	772701	11p15.5	GATD1	Fuchs's corneal dystrophy
SWAP70	chr11	chr11:9705005-9706372	TGATCTGTATACACTGGTGATCTGTATACACTGGTGATCTGTATACACTGG	51	1367	26.8039	0	0	0	0	1462.14	1567	NA	1366	1348	1348	1348	1348	1910	0	0	0.982185	0.061984	0.810108	1.16636	chr11	9719502	9719502	11p15.4	SWAP70	Tonsillectomy
DNAH10	chr12	chr12:123911265-123912509	TGGGGGGTCTGTCCTGGGGGGGTCTGTCC	29	1244	42.8966	0	0	0	0	3125.8	3371	NA	1054	4019	NA	NA	3674	3511	53	12	0.976039	0.0607875	0.754339	1.36001	chr12	123914608	123914608	12q24.31	DNAH10	Lymphocyte counts
LOC101929984	chr12	chr12:128844446-128846998	GAGGAAGGGCCACTCTGTGACACCGCGAGCCCGGACGTCTGTCCTCCAGAGCCG	54	2552	47.2593	0	0	0	0	2355.71	NA	3149	2006	2006	2169	2518	2360	2282	62	37	1.0514	0.124938	0.693304	1.49107	chr12	128840393	128840393	12q24.33	AC108704.1 - GLT1D1	Renal sinus fat
TMEM132D	chr12	chr12:129855061-129859088	AACAGAGTCCGGGGGAACGGGATGGGTGCCCTTGT	35	4027	115.057	0	0	0	0	3241.86	2142	NA	3030	3265	2992	2845	2780	5639	212	275	1.0234	0.103176	0.689775	1.80685	chr12	129947107	129947107	12q24.33	TMEM132D - AC055717.2	Clostridium difficile infection in multiple myeloma
LOC105370078	chr12	chr12:130090700-130092289	GTGCCTACTGA	11	1589	144.455	18038	0	0	0	1570.38	1588	1582	1589	1589	1589	1448	1589	1589	232	153	1.01454	0.111812	0.65802	1.55252	chr12	130078818	130078818	12q24.33	LINC02419 - AC026336.4	Male-pattern baldness
RIMBP2	chr12	chr12:130539520-130540133	ATGGCAAATGCAGTCGATGAGGTGGCCAGGTGTAGGAT	38	613	16.1316	0	0	0	0	551	537	537	537	537	575	535	613	537	193	96	0.990574	0.0727624	0.807148	1.64487	chr12	130537465	130537465	12q24.33	RIMBP2	Psychosis and Alzheimer's disease
ADGRD1	chr12	chr12:131067594-131068055	TCTGCCTCCTGTATGTCTGATCGCTGTGCCCCTGATCCTTCTTCTGAGCAGGGGCTGCCC	60	461	7.68333	0	0	0	0	433.125	461	461	581	340	387	387	387	461	28	15	1.01621	0.116591	0.664396	1.5194	chr12	131079007	131079007	12q24.33	ADGRD1	Adolescent idiopathic scoliosis
ADGRD1	chr12	chr12:131071007-131071403	GGTGGAGCCATGTGCAAGGAGGTGGGGCTAAGTGAAAGGA	40	396	9.9	0	0	0	0	355.5	316	316	314	396	395	395	396	316	56	39	0.993586	0.065069	0.800947	1.59254	chr12	131079007	131079007	12q24.33	ADGRD1	Adolescent idiopathic scoliosis
DDX51	chr12	chr12:132134624-132136421	TGCCCACGGTGCCCGCTCCTCCCACCTCCCGAGTG	35	1797	51.3429	268	0	0	0	1691.25	1855	1863	1867	1905	990	1795	1381	1874	41	48	1.01374	0.084238	0.759566	1.49005	chr12	132119842	132119842	12q24.33	EP400P1	Airflow obstruction
NOC4L	chr12	chr12:132148891-132150764	CCTCGGTGAGTGCCGCCGCCTCGCTCACACCACACCCCTAATCC	44	1873	42.5682	0	104113	0	0	1553.43	1472	1922	2743	558	NA	558	1112	2509	4	34	1.03454	0.148604	0.562187	1.51483	chr12	132119842	132119842	12q24.33	EP400P1	Airflow obstruction
GALNT9	chr12	chr12:132230964-132235225	CCCTAGTGCCACACACTCGATGGGGCGACAGAGGAGACAGCGTGGAGT	48	4261	88.7708	0	0	0	0	2648.5	NA	NA	NA	NA	2866	1469	2670	3589			1.01206	0.0964049	0.730691	1.84845	chr12	132218673	132218673	12q24.33	GALNT9	Anti-saccade response
LOC101928416	chr12	chr12:132361757-132362613	CCCGCACCAGCGGCCCGCACACTCACGCCTCGCTGTGCTGTCTGCCCTCCATCA	54	856	15.8519	30082	0	0	0	968.143	961	1553	NA	962	800	845	801	855	67	30	1.02428	0.0892985	0.00397605	1.61106	chr12	132442096	132442096	12q24.33	AC148476.1 - AC079031.1	Gait speed in old age
LOC105370092	chr12	chr12:132401379-132402324	ATCCACCCACCCACCCATCC	20	945	47.25	26500	0	0	0	923.143	930	NA	923	914	919	916	915	945	42	21	1.00124	0.0745307	0.745657	1.64855	chr12	132442096	132442096	12q24.33	AC148476.1 - AC079031.1	Gait speed in old age
POLE	chr12	chr12:132683890-132685395	CACAGAGAGCTACCATTGACTGGTTACTGTATCACACCGTCCCAGTACTCCACACAGGCTCTCATT	66	1505	22.803	0	0	0	0	1528.88	1503	1505	1571	1505	1571	1504	1501	1571	81	98	0.995545	0.070028	0.74809	1.59018	chr12	132650245	132650245	12q24.33	POLE	Urate levels in overweight individuals
PIK3C2G	chr12	chr12:18369406-18370084	ATCATATAACGATCGTATAATTGACATATG	30	678	22.6	0	0	0	0	562	616	439	614	567	488	507	617	648	157	244	1.00924	0.113015	0.662821	1.63628	chr12	18355318	18355318	12p12.3	PIK3C2G	Gray matter volume (schizophrenia interaction)
CACNA1C	chr12	chr12:2255791-2256090	GACCCTGACCTGACTAGTTTACAATCACAC	30	299	9.96667	0	0	0	0	5625.88	5962	5939	5668	4769	5630	5673	5639	5727	2290	867	1.01845	0.172298	0.406063	1.73092	chr12	2257541	2257541	12p13.33	CACNA1C	Educational attainment (MTAG),Highest math class taken (MTAG)
CACNA1C	chr12	chr12:2520070-2520886	GGGAAGCCATGACAGTCTTCTCATTGCCCAATGGCCGTGTGCTTCAGAGGA	51	816	16	0	0	0	0	1444.38	1732	1718	1173	1735	1117	1173	1173	1734	296	189	0.994875	0.0623937	0.846553	1.50457	chr12	2575536	2575536	12p13.33	CACNA1C	Acoustic startle blink response
CACNA1C	chr12	chr12:2539201-2539899	GACTTAAGGAGGGCTTCATAAAGATGCAGGCAGGGTTTAAG	41	698	17.0244	0	0	0	0	1880.62	2233	2256	2046	2094	996	1804	1245	2371	499	195	0.986452	0.0713578	0.780713	1.58773	chr12	2575536	2575536	12p13.33	CACNA1C	Acoustic startle blink response
KDM5A	chr12	chr12:281927-282158	GCACAGAAGCGCAGAAGCAAAGCCCAGGCAGAACCATGCTAACCTTACAGCTCAGCCT	58	231	3.98276	0	377	0	377	231	231	231	231	231	231	231	231	231	26	20	0.983864	0.0618168	0.821922	1.46266	chr12	255573	255573	12p13.33	SLC6A13, AC007406.2	Glomerular filtration rate (creatinine)
TSPAN9	chr12	chr12:3268140-3269612	CTGCAGCCTGCCCTCCGTGTTC	22	1472	66.9091	0	0	0	0	2085.57	NA	1410	1472	1575	3254	2392	3024	1472	4	4	1.00534	0.0728171	0.844664	1.97661	chr12	3273397	3273397	12p13.32	TSPAN9	Gut microbiota (bacterial taxa)
LOC105369612	chr12	chr12:4119859-4120132	TGGGTTGGGAGATCATCCCGGTCAAGGG	28	273	9.75	52898	0	0	0	311.375	329	301	301	329	329	300	301	301	69	50	0.984626	0.061998	0.791968	1.38367	chr12	4063960	4063960	12p13.32	AC007207.2 - HSPA8P5	Alzheimer disease and age of onset
B4GALNT3	chr12	chr12:529678-530158	TCGGTAAAGGTGAGCTGCTATGAATATTGCCATTATTACAACTACTTAGGAGCAAAAGCAATACATCCTGCCGTGTACCT	80	480	6	0	0	0	0	579.875	480	720	480	640	479	640	480	720	136	93	1.01105	0.109188	0.658614	1.56673	chr12	512770	512770	12p13.33	B4GALNT3	Blood protein levels
LOC105369625	chr12	chr12:6290025-6291654	GTGGACTGGATCCTGTTCCGTCGGTGT	27	1629	60.3333	0	0	0	0	1460.43	1741	NA	1629	1190	1709	1160	1165	1629	206	155	0.998648	0.0670914	0.816936	1.5748	chr12	6276561	6276561	12p13.31	ATP5MFP5 - PLEKHG6	Colorectal cancer
NAP1L1	chr12	chr12:76120569-76122387	TATATATAT	9	1818	202	35964	0	0	0	4929.83	NA	4754	NA	4924	4630	5979	4665	4627	1206	53	1.00942	0.174622	0.655482	1.99828	chr12	76083176	76083176	12q21.2	NAP1L1	Obesity-related traits
NTS	chr12	chr12:85879257-85879855	ATTTTATGTAT	11	598	54.3636	0	0	0	0	1048.14	1029	1029	1034	NA	1130	1073	1060	982	607	12	0.99934	0.116837	0.664338	1.58436	chr12	85890681	85890681	12q21.31	NTS - MGAT4C	Post bronchodilator FEV1/FVC ratio
MGAT4C	chr12	chr12:86502618-86503801	TATATATATATATGAGTTCTGCTCA	25	1183	47.32	0	0	0	0	1181.33	1109	1097	1263	NA	1226	NA	1199	1194	292	77	0.983595	0.0757849	0.764007	1.48054	chr12	86470463	86470463	12q21.32	MGAT4C	Post bronchodilator FEV1/FVC ratio
MYO16	chr13	chr13:109008275-109008864	TATGCACTACTGTACTATCTTGTG	24	589	24.5417	0	0	0	0	533	513	530	509	509	509	575	582	537	236	252	0.98796	0.07546	0.810323	1.99877	chr13	109029488	109029488	13q33.3	MYO16	Self-reported math ability (MTAG)
COL4A2	chr13	chr13:110385400-110386180	GGTTACAGTGTGTGGATAGGCCGT	24	780	32.5	0	0	0	0	1748.75	1810	1811	1836	1812	1812	1282	1695	1932	300	76	0.997273	0.0657839	0.813053	1.27283	chr13	110388334	110388334	13q34	COL4A2	Coronary artery disease
COL4A2	chr13	chr13:110480846-110482022	CGTTGCTGGAGACACACTGTTCTGTCCCTC	30	1176	39.2	0	0	0	0	1568	2215	2212	1289	1438	1470	1287	1306	1327	107	117	0.998138	0.0715577	0.779769	1.28628	chr13	110465171	110465171	13q34	COL4A2	Facial morphology (factor 22)
ARHGEF7	chr13	chr13:111254364-111255228	CTAACGTGAAGGCCGGGCCCAGAAGAGGATTCGGGCTAAGGCGCTGAGTCG	51	864	16.9412	0	0	0	0	792.375	863	811	813	813	811	806	813	609	122	59	1.00485	0.0570734	0.853105	1.20522	chr13	111241066	111241066	13q34	ARHGEF7	Macular thickness
F7	chr13	chr13:113107243-113109277	GTGGGTGTCCCGGGAGTGTGGGTGTCCCGGGGGC	34	2034	59.8235	0	0	0	0	2094.29	NA	2244	2269	1235	2283	2150	2276	2203	28	39	1.02072	0.0857941	0.758852	1.27659	chr13	113109612	113109612	13q34	F7	Blood protein levels
GRTP1	chr13	chr13:113371392-113371923	TCCTGAGGCCCCCTCCCTCCTCCTGAGACCCCCTCCCTCC	40	531	13.275	7134	0	0	0	1921.67	1741	2879	2095	NA	NA	1329	1579	1907	24	11	1.02818	0.0864927	0.71944	1.4434	chr13	113370553	113370553	13q34	GRTP1 - ADPRHL1	Mean platelet volume
ADPRHL1	chr13	chr13:113434242-113437429	GGTGTACCCCGGGACCCAGCACCCAGGTGTAGAGTGAACATA	42	3187	75.881	0	0	0	0	3677.88	3293	4062	3817	3723	3472	3681	3558	3817	129	34	1.00394	0.0712224	0.703305	1.33862	chr13	113370553	113370553	13q34	GRTP1 - ADPRHL1	Mean platelet volume
TFDP1	chr13	chr13:113624316-113626173	CAGGTGTCCTCAGGTGTCTCT	21	1857	88.4286	0	0	0	0	1876.38	1836	1830	1836	1815	1919	1727	2212	1836	19	32	1.00998	0.0690714	0.807004	1.23773	chr13	113559810	113559810	13q34	TMCO3 - TFDP1	Influenza A (H1N1) infection,Mild influenza (H1N1) infection
LINC00452	chr13	chr13:113898830-113900613	CTCCCGACCAGAGCAGCCACCGTCCTGGTGTCTCCCATCAGAGGTAAGTGTGGT	54	1783	33.0185	0	108	0	0	1073.75	918	919	1837	1027	1026	973	917	973	55	42	0.997394	0.0635568	0.747651	1.16885	chr13	113919624	113919624	13q34	LINC00452	Response to tocilizumab in rheumatoid arthritis
RASA3	chr13	chr13:113995592-113996120	GGCCCGGCTGATGGGG	16	528	33	0	0	0	0	531.375	533	530	523	517	559	525	565	499	134	30	1.01823	0.0683429	0.801054	1.23019	chr13	113930357	113930357	13q34	LINC00565 - C13orf46	Lymphocyte counts
LOC107984132	chr13	chr13:19137426-19138388	TTCTTTGTTGCGGTGTTACTGACAGTATAGGGAGTG	36	962	26.7222	19308	0	0	0	2047.38	3145	3059	1402	3131	1489	1431	1364	1358	715	227	0.999806	0.104986	0.706594	1.30123	chr13	19157404	19157404	13q12.11	SMPD4P2	Post bronchodilator FEV1/FVC ratio
LOC107984600	chr13	chr13:22577160-22577315	CACCCCACTGTCAACATTAGACAGATCAACGAGACAGAAAGTCAACAAGGATACCCAGGAATTGAACTCAGCTCTG	76	155	2.03947	89045	0	0	0	155	155	155	155	155	155	155	155	NA	2	79	0.977333	0.0611765	0.813294	1.15829	chr13	22573309	22573309	13q12.11	AL136962.1 - FTH1P7	Blood osmolality (transformed sodium)
DCLK1	chr13	chr13:35761366-35763770	TACACACC	8	2404	300.5	5198	0	0	0	2354.14	2428	2239	2381	2381	2397	NA	2225	2428	999	800	0.988182	0.0682335	0.769534	1.23259	chr13	35761589	35761589	13q13.3	LINC00445 - DCLK1	Lobe attachment (rater-scored or self-reported)
RB1	chr13	chr13:48427114-48428490	AGTCATCTTCTACCAAACCTCACCTCCAGCATTGGGGAGCACACTTCAACACG	53	1376	25.9623	0	0	0	0	1312.62	1427	1320	1425	1058	1321	1322	1305	1323	126	90	0.980677	0.0619584	0.818814	1.18087	chr13	48442207	48442207	13q14.2	LPAR6, RB1	Major depression and alcohol dependence
KPNA3	chr13	chr13:49799391-49800034	TCTGCATGATTTTACACATATGTGAAA	27	643	23.8148	6709	0	0	0	802	721	NA	847	966	720	826	783	751	225	203	1.00612	0.0580998	0.832399	1.17334	chr13	49764020	49764020	13q14.2	KPNA3	General cognitive ability
LOC102723968	chr13	chr13:63840344-63841496	CTGAGAGCCAGCCCCTCTTCCCCCCCTGGCTCTTAGGACCCCCATCGCAGGGGGGGAGGCACCCCCGCGAGGCGGGGA	78	1152	14.7692	0	0	0	0	1137.71	1152	1150	1379	NA	974	1150	1007	1152	61	9	1.02071	0.0853175	0.782536	1.42632	chr13	63636265	63636265	13q21.31	LINC00376 - LINC00395	Response to inhaled corticosteroid treatment in asthma (change in FEV1)
LOC105370299	chr13	chr13:86115001-86115196	TGTATATATGTATATATACACATATATGTG	30	195	6.5	287620	0	0	0	893.25	914	914	972	787	912	983	915	749	19	7	0.993219	0.0733743	0.774751	1.22399	chr13	86116392	86116392	13q31.1	AL354994.1	Economic and political preferences (fairness)
GPC5	chr13	chr13:92385311-92385827	TATATATATACGTATATATATACGTA	26	516	19.8462	0	0	0	0	512.75	532	547	512	507	499	499	499	507	0	0	0.989145	0.0658762	0.833325	1.23636	chr13	92336070	92336070	13q31.3	GPC5	Tetralogy of Fallot
LOC105370690	chr14	chr14:103896553-103896789	ATGTGGAGATGGATCCCGCCTTCCTTCCCCGTC	33	236	7.15152	0	0	0	0	1355.25	1836	1364	1333	1192	1302	1191	1258	1366	88	24	0.996021	0.0602382	0.796343	1.1738	chr14	103891301	103891301	14q32.33	AL132712.1 - ATP5MPL	Blood metabolite levels
LOC388022	chr14	chr14:104720315-104721455	TGCTGCTGTGGACGTCTGCGTCGTCCTCGTGTGGA	35	1140	32.5714	0	544	0	544	1109.12	1100	1101	1100	1100	1101	1100	1100	1171	128	106	1.02229	0.0690963	0.793775	1.26572	chr14	104745925	104745925	14q32.33	ADSSL1	Breast cancer
CEP170B	chr14	chr14:104905184-104907042	GTGGGAACCGAGAGCCAGGACGCGCAGGGAGCTGTCGCTGCAG	43	1858	43.2093	9323	0	0	0	1624.5	1854	1858	1293	1454	1454	1771	1454	1858	110	43	1.00415	0.06277	0.788271	1.22416	chr14	104919015	104919015	14q32.33	AL583810.3 - PLD4	Cerebrospinal fluid t-tau levels,Cerebrospinal fluid t-tau levels in normal cognition
NUDT14	chr14	chr14:105186322-105186733	TGTGGGGGTATGTG	14	816	58.2857	5401	0	0	0	756.5	809	782	750	798	800	680	754	679	101	25	0.998263	0.071286	0.799422	1.22987	chr14	105221745	105221745	14q32.33	BRF1	Huntington's disease progression
MTA1	chr14	chr14:105458973-105460320	CCCTGGTCCCTGGCGCCTGGGGAGCTGTGTGCCTGGGGGGAGTCCGTGCTGCCCATGGC	59	1347	22.8305	0	0	0	0	880.75	815	816	815	816	811	1341	816	816	15	24	1.01694	0.0713173	0.772079	1.40741	chr14	105458963	105458963	14q32.33	MTA1	Heel bone mineral density
MIR8071-1	chr14	chr14:105593359-105594775	AATCCAGGGTGCCCTCACCTCGAAATCCTTGAC	33	1416	42.9091	26287	0	0	0	977.5	NA	NA	921	1267	916	919	921	921	135	125	1.06207	0.192789	0.436006	2.13797	chr14	105585164	105585164	14q32.33	IGHA2	Blood protein levels
NFATC4	chr14	chr14:24364381-24364894	TATATACTGTATATATA	17	513	30.1765	1990	0	0	0	567.25	548	510	420	551	513	513	513	970	0	0	0.992819	0.0599147	0.823698	1.16285	chr14	24361644	24361644	14q12	RF00026 - NFATC4	Height
LOC102724945	chr14	chr14:34205223-34205824	TACCTCCATCGCCCCAACCAACTCTTC	27	601	22.2593	1423	0	0	0	1007.14	954	959	1169	NA	633	1460	762	1113	161	123	0.987153	0.0655489	0.78226	1.17331	chr14	34177063	34177063	14q13.1	EGLN3	Hematocrit
ESRRB	chr14	chr14:76413815-76414216	GCCCCTGCACCGTCCCCC	18	401	22.2778	0	0	0	0	399.429	418	401	NA	401	380	400	395	401	5	3	1.01301	0.111571	0.69057	1.69493	chr14	76346352	76346352	14q24.3	ESRRB	Maximal oxygen uptake response
RIN3	chr14	chr14:92546999-92547387	ATTATCTTTATTTTATTATTATATAATAATTATCTTTATTTTATTATTATAAAATAA	29	311	10.7241	0	0	0	0	1712.86	NA	1640	1645	1431	1395	2082	1519	2278	512	7	0.995884	0.0604305	0.725195	1.2083	chr14	92546280	92546280	14q32.12	RIN3	Lymphocyte percentage of white cells
SERPINA2	chr14	chr14:94345981-94346589	TGCACGGGAAAGCCCCTGCACCACACAGGACTGTCCAGCCCGTGATGTGCCTGCAG	56	608	10.8571	17796	0	0	0	628.625	550	550	776	609	552	608	552	832	46	28	0.993613	0.0556782	0.767837	1.17893	chr14	94343423	94343423	14q32.13	SERPINA6 - SERPINA2	Blood protein levels
LOC105371026	chr15	chr15:101095753-101096527	AGACCCACAGCAAAGATCCCATCTACTGATGAAGCAA	37	774	20.9189	0	0	0	0	903.125	958	959	774	959	1033	773	773	996	133	53	0.99261	0.0612073	0.816334	1.17917	chr15	101045131	101045131	15q26.3	AC090907.1, LRRK1	Central corneal thickness
SNRPN	chr15	chr15:24918298-24919081	ATATATATATAACATAATATATATGTGC	28	783	27.9643	0	0	0	0	758.375	788	719	697	819	715	737	751	841	69	16	0.974806	0.0666144	0.784376	1.18261	chr15	24925023	24925023	15q11.2	SNRPN	Time-dependent creatinine clearance change response to tenofovir treatment in HIV infection (time and treatment arm interaction)
FBN1	chr15	chr15:48529839-48530376	TTATCCATGCTGCATCCGCCGCCCGATCACAACTTGAAAATGGAGTCTGAATTC	54	537	9.94444	0	0	0	0	530.25	537	486	537	537	537	534	537	537	41	43	0.999334	0.107332	0.655673	1.54384	chr15	48530561	48530561	15q21.1	FBN1	Intraocular pressure
FAM227B	chr15	chr15:49371607-49372299	TAAAATTCACTTATAAATAAATGAAA	26	692	26.6154	0	0	0	0	766	768	738	821	718	813	683	765	822	545	126					chr15	49407114	49407114	15q21.2	FAM227B	Blood protein levels
LOC107984734	chr15	chr15:70129964-70130373	CAGAGCAGGATCTGGAAACCCAGAGAGACGCCTAGGGTCCATCCTGCAGCGAGGAAAGGCCGGCTCTC	68	409	6.01471	0	0	0	0	433.75	409	409	408	408	477	474	477	408	16	15	0.993901	0.0581426	0.771011	1.1875	chr15	70139434	70139434	15q23	TLE3 - RNU6-745P	Lung adenocarcinoma
LINGO1	chr15	chr15:77699274-77699774	GCACACAGTAAGCACATACTAACCATCACCTGCACACAGTAAGCACATACTAACCATCATCCCC	64	500	7.8125	0	0	0	0	2525.12	2489	2521	2525	2526	2558	2511	2546	2525	84	89	0.994917	0.0522367	0.804885	1.15253	chr15	77703607	77703607	15q24.3	LINGO1	Cognitive performance (MTAG)
LOC105370919	chr15	chr15:79574896-79575231	CCTGCAGTTGGTAGGTGCTGTATAATGTTGACTGCCA	37	335	9.05405	54043	0	0	0	330.25	372	260	261	335	372	335	372	335	216	92	0.984041	0.058604	0.809928	1.18269	chr15	79571143	79571143	15q25.1	AC023968.2 - AC023968.1	Type 2 diabetes
PLIN1	chr15	chr15:89663530-89664030	TGCCAGGGCCACAGAGTCAG	20	500	25	335	0	0	0	541	640	520	637	640	518	460	473	440	269	59	1.00423	0.0602228	0.781413	1.19801	chr15	89671546	89671546	15q26.1	PLIN1	HDL cholesterol
C1QTNF8	chr16	chr16:1092249-1093358	CTGCACACAGTCGGCGCTCAACCAATCA	28	1109	39.6071	0	0	0	0	1784.5	NA	1669	NA	2400	NA	NA	1397	1672	230	104	1.02708	0.0775365	0.789716	1.24697	chr16	1079010	1079010	16p13.3	SSTR5	Heel bone mineral density
SMG1	chr16	chr16:18827431-18827867	TATATATATTTGGTATAAATATACCAAAATATATATTTT	39	436	11.1795	0	0	0	0	441.286	435	434	436	NA	436	436	436	476	78	5	0.998167	0.0674058	0.773562	1.216	chr16	18806640	18806640	16p12.3	SMG1, AC138811.1	Heel bone mineral density
RAB11FIP3	chr16	chr16:494763-495050	GAGGTGGGAGGATCACATGAGCCGGGGAGGTCGAGGCTGCA	41	287	7	0	0	0	0	1647.86	1269	NA	1922	1926	1713	1324	1473	1908	0	0	1.02402	0.1308	0.478097	1.61254	chr16	496045	496045	16p13.3	RAB11FIP3	Heel bone mineral density
PIGQ	chr16	chr16:579428-579877	CTAGAGGTGCCCCGGGCCCGGAGA	24	449	18.7083	0	0	0	0	378.143	329	425	NA	328	416	329	443	377	59	33	1.03082	0.0793609	0.780734	1.34717	chr16	580665	580665	16p13.3	PIGQ	Disc degeneration (lumbar)
LOC105371310	chr16	chr16:64165945-64166213	ATAATATATAATTATTATATTATATATTAT	30	268	8.93333	178044	0	0	0	658.125	748	644	683	595	705	609	661	620	8	0	0.98361	0.0675021	0.771977	1.234	chr16	64148952	64148952	16q21	AC092337.1 - AC093536.2	Facial morphology (factor 11, projection of the nose)
PLCG2	chr16	chr16:81865655-81866785	CTGGCCTCTCCCTTGCTCCCAGGATGAGCTCCACTGGGGCACCAGCATGAGAGGACG	57	1130	19.8246	0	0	0	0	977.75	1129	1130	846	846	1015	842	884	1130	40	17	0.997551	0.0665903	0.696146	1.18691	chr16	81870195	81870195	16q23.3	PLCG2	Coronary artery disease
GSE1	chr16	chr16:85404091-85412778	CAGGGCCCCCCGGATAATCCTCACTGTTACACT	33	8687	263.242	0	0	0	0	3769.75	NA	NA	2578	NA	2829	NA	2466	7206	11	146	1.018	0.144848	0.613324	1.53803	chr16	85419089	85419089	16q24.1	GSE1	Platelet distribution width
LMF1	chr16	chr16:857422-859987	GGGTGTGCAGTGGTGTCTCGGGAC	24	2565	106.875	0	0	0	0	4982.75	NA	4778	NA	4883	NA	NA	4378	5892	5	207	1.05512	0.122937	0.623235	1.4795	chr16	792706	792706	16p13.3	CHTF18	Mean corpuscular volume
LOC105376778	chr16	chr16:86107788-86108943	TACTACTACCATTACTACTACTACCACCATTACTACTACTGC	42	1155	27.5	48325	0	0	0	1287.62	1287	1227	1287	1348	1302	1407	1288	1155	89	156	1.00227	0.0541616	0.857904	1.18991	chr16	86106079	86106079	16q24.1	AC135012.1 - AC135012.2	Plasma omega-3 polyunsaturated fatty acid levels (docosahexaenoic acid)
KLHDC4	chr16	chr16:87738533-87739672	TCCATCCACACACCAGCACCTCA	23	1139	49.5217	0	0	0	0	1853.33	NA	NA	2258	2057	1088	2062	1607	2048	505	449	1.01262	0.114524	0.638276	1.63214	chr16	87794485	87794485	16q24.2	AC126696.1	Facial morphology (factor 4, facial height related to vertical position of gnathion)
BANP	chr16	chr16:87998536-88001403	CTGTCCTTCCAGACACGTCTCCATGCACGCACGTGCGCGGCTGTACTTAC	50	2867	57.34	0	0	0	0	2074	1657	1657	2073	2073	2281	2597	2597	1657	27	15	1.03332	0.122515	0.644867	1.46802	chr16	87960283	87960283	16q24.2	BANP	Systolic blood pressure
SNAI3-AS1	chr16	chr16:88668175-88668402	ATCTTTTCTGCTCCTCTCCCTCCTCCTGCCCTCCCCCC	38	227	5.97368	0	0	0	0	926.875	1316	1235	529	396	607	1281	720	1331	109	95	0.996747	0.0734941	0.792866	1.34182	chr16	88666165	88666165	16q24.2	SNAI3-AS1	Subclinical trait of interstitial lung disease (basilar peel-core ratio of high attentuation areas on CT scan)
CTU2	chr16	chr16:88712911-88713283	GCCCCTGAGAGCCCCCCTTCCCCGGGCCCTGACCCCCACTCATGCCCTGAGAGCCCCCTTCCCCGGGCCCTGACCCCCACTCATGCCCCTGAGAGCCCCCCTTCCCCGGGCCCTGACCCCCACTCAT	127	372	2.92913	0	0	0	0	1212.14	963	NA	1511	1510	621	1557	653	1670	30	2	1.03164	0.0869671	0.776185	1.33898	chr16	88714277	88714277	16q24.3	CTU2	Plateletcrit
PIEZO1	chr16	chr16:88728342-88729958	AACCCACAGCCCCATCTGCCACAGAGGGAACCTCGCGACCCAAAAACAAAGTGACCCTCGATGCTGGGGAACCCAGGACATGCTG	85	1616	19.0118	0	0	0	0	1795	1941	NA	2042	1957	1613	1697	1614	1701	68	62					chr16	88730363	88730363	16q24.3	PIEZO1	Platelet count
LOC100129697	chr16	chr16:88950191-88951326	TCTGTTCACCCGTCCCCTGGACCGGCACCGCCACAGAGGGTCAGAGTGTTGGCACCTGTCTTCCGGA	67	1135	16.9403	0	201	0	0	1143.12	1135	1200	1135	1135	1135	1135	1135	1135	65	12					chr16	88950086	88950086	16q24.3	AC092384.1, CBFA2T3	Mean platelet volume
CBFA2T3	chr16	chr16:88954287-88956050	CCCAAGGCTCCTGACCCCA	19	1763	92.7895	0	0	0	0	1700.25	1701	1703	1668	1706	1706	1706	1706	1706	280	237	1.02569	0.117349	0.675361	1.56209	chr16	88950086	88950086	16q24.3	AC092384.1, CBFA2T3	Mean platelet volume
CBFA2T3	chr16	chr16:89002097-89003272	GGAGCCGGGGGGACAGA	17	1175	69.1176	25669	0	0	0	1761.38	1738	1728	1819	1815	1736	1742	1760	1753	290	103	1.03469	0.112726	0.694985	1.52965	chr16	89016728	89016728	16q24.3	AC135782.2 - AC135782.1	Non-melanoma skin cancer
LOC400558	chr16	chr16:89165821-89166775	ACCCACGCAGCAGGGGAGAGGACAGACGTCCGGAACTGGGTAGAGATGGGCCGTGGGTGGGATCTGCTGGGGACACAG	78	954	12.2308	0	117	0	0	984.25	1111	954	954	954	880	954	953	1114	62	3	1.01828	0.0697708	0.828899	1.26776	chr16	89168993	89168993	16q24.3	LINC02138	Low tan response
USP7	chr16	chr16:8953494-8954273	GAAGACACGTGCCCCCTGCGGCGCCACTGGAGGCAGAGG	39	779	19.9744	0	0	0	0	626.875	583	583	545	583	584	930	623	584	89	42	1.00416	0.0603591	0.789211	1.23213	chr16	8954178	8954178	16p13.2	USP7	Platelet count
TCF25	chr16	chr16:89914130-89914913	TGTGTGTGTGTGCCTGTGTGTGTGGGTGCACATTTG	36	783	21.75	2834	128757	757	0	813.5	872	872	785	788	785	823	800	783	63	73	1.01324	0.0632815	0.845618	1.21459	chr16	89913086	89913086	16q24.3	TCF25, AC092143.3, MC1R	Red vs. brown/black hair color
LMF1	chr16	chr16:960255-962281	ACTCACGGTGACAGCACGGGATCACGACCCAGACACAG	38	2026	53.3158	0	0	0	0	1618.71	1671	1754	NA	1914	1427	1651	1554	1360	740	426	1.01892	0.117517	0.699329	1.59963	chr16	954554	954554	16p13.3	LMF1	Educational attainment (MTAG),General cognitive ability,Glioblastoma,Glioma,Highest math class taken (MTAG),Non-glioblastoma glioma,Self-reported math ability (MTAG)
GRIN2A	chr16	chr16:9848528-9849200	AATATATAAAATACACTGTTTTATATATTTA	31	672	21.6774	0	0	0	0	855.625	1003	1033	1037	1043	544	467	576	1142	505	22					chr16	9852462	9852462	16p13.2	GRIN2A	Schizophrenia
TMEM220-AS1	chr17	chr17:10759050-10759576	CCCAGCCCCTACCCGCCT	18	526	29.2222	0	0	0	0	504	559	NA	346	544	484	507	508	580	140	45	0.983499	0.0600597	0.805993	1.15012	chr17	10806436	10806436	17p12	AC015908.6, AC015908.7, TMEM220-AS1	Colorectal cancer
ABR	chr17	chr17:1163433-1164538	GCATCTAGGTGGGACCCTGGCAAAGTGTCACACACAGCACTGAATCCAGACGCAGGGACCCCAGATAAACTGCAAGACGCCCAGTGAACATGGATGTCGGA	101	1105	10.9406	0	0	0	0	1562.25	1513	1710	1214	1710	1311	1718	1603	1719	96	50	0.999397	0.0601089	0.816893	1.21397	chr17	1046020	1046020	17p13.3	ABR, ABR, ABR	Cognitive empathy
MIR212	chr17	chr17:2052378-2053079	GCCTGGGCTGGGGCAGGGCTGTGAGACCCTCCCTTACAGAAGCAATGAGGGCTTGAGGAGGGGGTTAGGG	70	701	10.0143	1899	0	0	0	86.5	0	0	210	211	271	0	0	0	163	38	1.03973	0.0901234	0.763365	1.30456	chr17	2055242	2055242	17p13.3	HIC1	Platelet count,Plateletcrit
RPH3AL	chr17	chr17:220090-222105	GCACAACAGCTCTGAGGCCTCCACTCACTGAGACAATAGACCCAA	45	2015	44.7778	0	0	0	0	1851.75	1745	2014	1745	1655	1970	1970	1970	1745	139	87	0.990807	0.135263	0.61494	1.44458	chr17	216209	216209	17p13.3	RPH3AL, RPH3AL	Pediatric bone mineral content (radius)
RPH3AL	chr17	chr17:242246-244307	TGATTACCTTCCTCTAT	17	2061	121.235	0	0	0	0	2895	4056	2188	3236	1945	3415	3279	NA	2146	852	526	1.00011	0.0705627	0.687659	1.17106	chr17	230930	230930	17p13.3	RPH3AL, RPH3AL	Idiopathic intracranial hypertension
VPS53	chr17	chr17:504898-507171	CTAGAAGAGCATTGGTGACCTTCGAGAGCAGGGTCAGGACAGTGGTTGAGATGGAAGCTGACTTT	65	2273	34.9692	1495	0	0	0	1828.5	1427	1487	NA	1428	NA	2698	1658	2273	115	5	0.985521	0.0683838	0.775009	1.20617	chr17	519811	519811	17p13.3	VPS53	Hip circumference adjusted for BMI
VPS53	chr17	chr17:642275-643850	AGGACAACACTCATACTTGGAAAGCG	26	1575	60.5769	0	0	0	0	1509.38	1522	1497	1523	1549	1549	1682	1620	1133	617	430	1.00501	0.114047	0.688257	1.57919	chr17	583581	583581	17p13.3	VPS53	HDL cholesterol
SEC14L1	chr17	chr17:77215714-77216452	GGTAGGGTTAGTA	13	738	56.7692	0	278	0	278	662	733	660	672	660	618	647	620	686	294	267	0.991628	0.0579646	0.841106	1.17224	chr17	77215126	77215126	17q25.3	SEC14L1	Cognitive performance
RPTOR	chr17	chr17:80840275-80842074	AGCTCACTCTCACCGCACGGC	21	1799	85.6667	0	0	0	0	1813.14	1851	NA	1819	1850	1792	1794	1776	1810	362	123	1.00546	0.0627324	0.789704	1.31694	chr17	80807851	80807851	17q25.3	RPTOR	Airway responsiveness in chronic obstructive pulmonary disease
RPTOR	chr17	chr17:80875658-80877115	CTGCCGGGTCTTCCACCGAGCCCGTGCCACGCAGGGTGTGTGTGTCGC	48	1457	30.3542	0	0	0	0	1557.57	1692	NA	1309	1698	1687	1412	1407	1698	42	25	1.01596	0.0729139	0.771139	1.29982	chr17	80807851	80807851	17q25.3	RPTOR	Airway responsiveness in chronic obstructive pulmonary disease
BAHCC1	chr17	chr17:81415972-81416641	GCGTGTGTGTGTGTCCATGAGGATGGGTGTATGC	34	669	19.6765	0	0	0	0	743.875	739	740	740	748	747	749	748	740	14	9	1.0297	0.0757276	0.791234	1.32356	chr17	81420736	81420736	17q25.3	BAHCC1	Heel bone mineral density
B3GNTL1	chr17	chr17:83002887-83004854	TCCGCGTGTGGGATTCCTGAGCCCGCCCTCCCGCCCTCCGCGTGTGGGATTCCTGAGCCCGCCCTCCCACTCTCCGCAG	79	1967	24.8987	0	0	0	0	1662.75	1784	1503	1791	1691	1640	1380	1988	1525	132	32	1.02006	0.0651302	0.814676	1.28002	chr17	83047886	83047886	17q25.3	B3GNTL1, B3GNTL1	Plasma factor VII activating protease levels
LOC101929650	chr17	chr17:83181483-83182038	GGCCTGGCTTTCCACGCCTGGGGGGTGCAGGGGGGATG	38	555	14.6053	0	0	0	0	811	991	1041	551	815	655	812	624	999	29	13	1.01498	0.0719596	0.767312	1.2801	chr17	83115144	83115144	17q25.3	AC144831.1 - AC139099.4	Monocyte count,Monocyte percentage of white cells
FAM210A	chr18	chr18:13673059-13676523	ACATTCCTGAGCCCCGACTTCTTTATTTCCAGTTTCCTGATTATTA	46	3464	75.3043	0	0	0	0	3276.75	3954	3954	3588	2919	2997	2874	3007	2921	68	106	1.0103	0.115317	0.677457	1.93837	chr18	13642922	13642922	18p11.21	LDLRAD4	Heel bone mineral density
THOC1	chr18	chr18:218955-219526	GTGGGCATGTGTTCCCTGAGCGGTACAAAATAACCAGTGAGGATGGCATATACTCTTAATAATAAATACTCATAAAGTGGTGGCAGGACAAGATT	95	571	6.01053	0	121,84	0	83	762	762	762	762	762	762	762	762	762	72	69	1.00502	0.109689	0.653113	1.67986	chr18	268992	268992	18p11.32	AP000845.1	Triglycerides
CABLES1	chr18	chr18:23218246-23218689	GCCCTGCCTCCCGCATCCTCACTT	24	443	18.4583	0	0	0	0	713.625	659	347	1128	1132	490	374	371	1208	267	116	0.999049	0.0595067	0.817422	1.16773	chr18	23196687	23196687	18q11.2	CABLES1	Breast cancer
LOC105372045	chr18	chr18:29511437-29512294	TATATTTATATAATT	15	857	57.1333	117541	0	0	0	1525.12	1661	861	873	1445	703	2845	2940	873	1470	7	0.996605	0.0712739	0.806132	1.25421	chr18	29508647	29508647	18q12.1	AC074237.1 - AC117569.1	Pulse pressure x alcohol consumption interaction (2df test)
FHOD3	chr18	chr18:36463316-36463514	TAATATATATTTTTATTTAAAAAA	24	198	8.25	0	0	0	0	1683.38	1603	1667	1670	1907	1891	1447	1697	1585	652	5	1.00855	0.106727	0.666945	1.66898	chr18	36527489	36527489	18q12.2	FHOD3	Response to antipsychotic treatment
MIR924HG	chr18	chr18:39324415-39325011	ATATATACACACACAC	16	596	37.25	0	0	0	0	699.625	685	784	578	602	686	786	690	786	257	279	1.00689	0.111427	0.659361	1.67922	chr18	39318495	39318495	18q12.2	AC011139.1, AC016205.1	Educational attainment (years of education)
LOC105372080	chr18	chr18:39970888-39972173	AATTATATATATGTTATATATAATCATAC	29	1285	44.3103	46106	0	0	0	877.125	807	922	802	795	974	966	1002	749	372	22	1.00334	0.117124	0.624765	1.84455	chr18	40039975	40039975	18q12.3	LINC01901 - AC011266.1	Cognitive function
SETBP1	chr18	chr18:44721943-44722150	AAATCTTTGTGGCTTCTGATAATTTGCATATTGTCACTTGTTTGCCAACTAGAGGGTATCTGGACATGTGTATGTGAGAGGGCATCTGCGTGGACATGCATGTG	104	207	1.99038	0	0	0	0	246	207	207	311	207	207	207	207	415	42	31	0.982213	0.0623765	0.804955	1.19834	chr18	44719084	44719084	18q12.3	SETBP1	Bone ultrasound measurement (velocity of sound)
MIR4527	chr18	chr18:47400455-47402990	CACTGTGCCTTTCCACAATCATCCTCCCACCCGGGGCCACCA	42	2535	60.3571	19912	0	0	0	2529.5	2826	2826	2366	2528	2175	2538	2607	2370	65	20	0.991108	0.06052	0.839437	1.20304	chr18	47403044	47403044	18q21.1	MIR4527HG	Cognitive empathy
DYM	chr18	chr18:49067088-49067531	TATGGAGGTTCAGTAGGGGAAGGAGTGGGGTGATGTGAGTGT	42	443	10.5476	0	0	0	0	1463.38	1464	1464	1464	1464	1460	1463	1464	1464	21	15	0.991455	0.0510047	0.797478	1.16359	chr18	49061284	49061284	18q21.1	DYM	Height
WDR7	chr18	chr18:57024495-57024955	GTTATGTCCCTTATAGAATTTCACATATCCCTATTCTCAGACAGGAATAGGGATATGTGAGCTATGATA	69	460	6.66667	0	0	0	0	1174.88	1347	3145	1211	665	556	733	594	1148	4	30	0.984436	0.0901032	0.745524	1.27882	chr18	57001343	57001343	18q21.31	WDR7	DNA methylation variation (age effect)
NEDD4L	chr18	chr18:58170288-58171480	CTGCCCGCCTCATCACCCCAGCCCAAGAGGACAGAACACTG	41	1192	29.0732	0	0	0	0	1212	1595	1060	1191	1231	1029	1050	987	1553	797	173	1.00676	0.102475	0.675955	1.56388	chr18	58143501	58143501	18q21.31	NEDD4L	Response to amphetamines
CDH20	chr18	chr18:61023319-61023790	ATATATGTATATATATGTTGTATGTATATAC	31	471	15.1935	309722	0	0	0	685	695	546	748	814	619	647	663	748	40	50	1.0054	0.114885	0.63152	1.66026	chr18	61158789	61158789	18q21.32	AC113137.1 - CDH20	Cannabis use (age at onset)
ZNF407	chr18	chr18:74616746-74617185	ACCACACACATCCATATCCACAC	23	439	19.087	0	0	0	0	2353.12	2434	2436	2436	2436	2212	2208	2227	2436			0.990416	0.0590458	0.824413	1.39639	chr18	74593494	74593494	18q22.3	LINC00909	Brain volume in infants (grey matter)
PTPRM	chr18	chr18:7691836-7692418	GAGGTGGAGGATGGCTAGATCCCAGGAGGTTAAG	34	582	17.1176	0	0	0	0	600.5	720	670	576	566	653	482	720	417	193	105	0.979644	0.0614396	0.834141	1.23018	chr18	7751791	7751791	18p11.23	PTPRM, AP000897.2	Coronary artery calcified atherosclerotic plaque (90 or 130 HU threshold) in type 2 diabetes
LOC107985129	chr18	chr18:77690302-77691271	TCTGTCTGACTGTGGGCGGCCTGCCGGCGCTCTAAAGGCTCTGTCGTCTG	50	969	19.38	26663	0	0	0	954.625	1028	918	928	928	969	969	969	928	71	32	1.00898	0.0596739	0.860564	1.29802	chr18	77661491	77661491	18q23	AC123786.2 - RNA5SP461	Diisocyanate-induced asthma
LOC105372219	chr18	chr18:78484898-78486661	AGTCCACACTCTACCTGCAGCCTCCTCCTGATGGGTGGCCAAGTCCACACTCTACCTGCAGCCTCCTCCTGATGGGTGGCCA	82	1763	21.5	32008	0	0	0	1749.75	1728	1762	1763	1728	1728	1763	1763	1763	3	21	1.00124	0.0699282	0.795597	1.28113	chr18	78469272	78469272	18q23	AC107892.1 - AC087399.1	Response to bronchodilator in chronic obstructive pulmonary disease (change in FEV1)
LOC105372219	chr18	chr18:78512771-78514913	CCAAGAATCAGCCTATCTAGACCTACTAACAGTGGGTCAGCAGACACTACC	51	2142	42	3596	0	0	0	4228.86	5692	NA	4320	5703	2439	4718	2448	4282	43	57	0.998927	0.115737	0.636622	1.38205	chr18	78469272	78469272	18q23	AC107892.1 - AC087399.1	Response to bronchodilator in chronic obstructive pulmonary disease (change in FEV1)
LOC105372221	chr18	chr18:78652766-78655411	CAGTCCCAGGAAACCCCTCAGTCCCGGGAACCCCTCAGTCCCGGGAACCCCTCAGTCCCGGGAAACCCCT	70	2645	37.7857	11494	0	0	0	2385.75	2117	2116	2222	2620	1978	2516	2917	2600	0	7	1.02208	0.0666643	0.828192	1.4308	chr18	78655450	78655450	18q23	RF00019 - AC044873.1	Response to amphetamines
LOC105372224	chr18	chr18:78819410-78819959	GGGGAGGAGGGGACCCTCTGCAGGAC	26	549	21.1154	88582	0	0	0	600.5	617	568	600	623	597	600	598	601	104	36	1.01524	0.110835	0.667709	1.60328	chr18	78831635	78831635	18q23	AC044873.1 - AC091027.2	Subcutaneous adipose tissue
LOC105372224	chr18	chr18:78838697-78841233	TCTGTGAGTGTGATTCATG	19	2536	133.474	67670	0	0	0	2195.43	1798	NA	2536	1798	1630	2536	2534	2536	0	0	1.00186	0.0650218	0.790106	1.38581	chr18	78831635	78831635	18q23	AC044873.1 - AC091027.2	Subcutaneous adipose tissue
CTDP1	chr18	chr18:79770993-79771559	CCTCCCCTCCACGCCGT	17	566	33.2941	17888	0	0	0	1030.62	1161	1161	1157	803	857	869	872	1365	202	69	1.00994	0.0677899	0.757274	1.2458	chr18	79769844	79769844	18q23	CTDP1 - AC021594.1	Feeling hurt
KCNG2	chr18	chr18:79864756-79867217	GAGGTCTGGGTGCTGA	16	2461	153.812	0	0	0	0	2555.25	2661	2661	2660	2647	2461	2460	2461	2431	887	584	0.995358	0.0758192	0.76352	1.45528	chr18	79864479	79864479	18q23	KCNG2	Opioid sensitivity
CYP4F24P	chr19	chr19:15778128-15779582	AGAGGAGTGAGTGAGTGAGG	20	1454	72.7	0	0	0	0	2298.75	1922	3357	2128	1957	2140	2138	2119	2629	1180	243	0.981422	0.0707021	0.746921	1.19524	chr19	15813903	15813903	19p13.12	OR10H1	RANTES levels
TCF3	chr19	chr19:1627738-1629140	CAGGGGGTGAGGCGGGAAGGGGACAGCAGAGCTCA	35	1402	40.0571	0	0	0	0	2020	709	1476	1401	3579	3191	1324	2749	1731	60	66	1.02762	0.0966252	0.716805	1.32502	chr19	1637053	1637053	19p13.3	TCF3	Objective response to lithium treatment
PLPP2	chr19	chr19:269752-271115	AAAGAAAGGCATGACCTATCCACCCACGCTACCCGGATGGACCTCACAGGCACACTGCTTCATGAGAGAG	70	1363	19.4714	10175	0	0	0	1375.62	1433	1433	1165	2314	1165	1165	1165	1165	12	13	0.997688	0.0612508	0.823062	1.22153	chr19	294946	294946	19p13.3	PLPP2 - MIER2	Peripheral arterial disease (traffic-related air pollution interaction)
ZNF554	chr19	chr19:2817668-2818635	ATGACTAAGGTCAGAGCAGGTGACCAAGGATAACTAAGGTCAGAGCAGGTGACAAGG	57	967	16.9649	1197	0	0	0	875	966	967	967	512	511	1598	512	967	6	24	1.03501	0.117418	0.650855	1.48353	chr19	2814183	2814183	19p13.3	THOP1	LDL cholesterol,Total cholesterol levels
THEG	chr19	chr19:360052-361960	GCTGGTTTGACTGTGGCTGTCGTTCCGACTCCGACGGTCCCGTGGCCCCTCAGCAGGAGCGTCG	64	1908	29.8125	49	262	0	261	1812.33	NA	NA	1907	1907	1907	1652	1593	1908	84	16	1.04378	0.131477	0.653606	1.54022	chr19	348743	348743	19p13.3	MIER2 - THEG	Non-small cell lung cancer
THEG	chr19	chr19:376675-377633	CCAGCCTCTCCCCCTCTGTGCCCCAC	26	958	36.8462	649	0	0	0	1630.88	579	1670	1223	2804	2312	1796	1779	884	217	50	0.990516	0.0810887	0.761869	1.30695	chr19	348743	348743	19p13.3	MIER2 - THEG	Non-small cell lung cancer
ZNF573	chr19	chr19:37751029-37751679	TATAGACAGCATATATACTGTGTATATATACAG	33	650	19.697	0	0	0	0	641	559	654	482	601	610	848	716	658	182	126	0.994114	0.0646513	0.813575	1.21942	chr19	37714343	37714343	19q13.12	ZNF607, AC093227.2	Glomerular filtration rate (creatinine)
TRPM4	chr19	chr19:49172487-49173397	TTCCATCCATCCATCTTCTCACCTGTCCATCCACACATCCACTGACAATTCCATTCACTCATTC	64	910	14.2188	0	0	0	0	903.75	910	910	910	912	880	910	918	880	201	197	1.02312	0.111858	0.716495	1.55996	chr19	49102448	49102448	19q13.33	SNRNP70	Systolic blood pressure
KDM4B	chr19	chr19:5076027-5076892	GAGAGCGGCCACACTGCGTCCTTTCCCCAGGGTCGTGCTCTCTCGTTGACCGAGTGAC	58	865	14.9138	0	0	0	0	1079.25	1267	1271	865	864	923	1258	923	1263	341	88	1.03392	0.110298	0.719285	1.46687	chr19	5080636	5080636	19p13.3	KDM4B	Periodontitis (CDC/AAP)
ETFB	chr19	chr19:51345715-51346385	CTCCCTATAGGTTGAGATGATGCAGTGAACCCTCCCTGTTGGCTGAGATGATGCACTGAACC	62	670	10.8065	0	0	0	0	935	979	821	877	951	951	983	967	951	58	36	1.01093	0.0608684	0.849663	1.21351	chr19	51324881	51324881	19q13.41	IGLON5	Blood protein levels
MBOAT7	chr19	chr19:54181616-54182087	AGGGAAGGAAGGAGGGAGGGAGGGAAGG	28	471	16.8214	0	0	0	0	567.833	NA	NA	471	619	638	519	525	635	38	30	1.01931	0.0715869	0.808684	1.38764	chr19	54187845	54187845	19q13.42	MBOAT7	Blood protein levels
U2AF2	chr19	chr19:55670424-55670554	CCCTGCTGTCCGTGCA	16	130	8.125	0	0	0	0	1268.17	1279	1265	1222	NA	NA	1157	1495	1191	80	140	1.00264	0.0663662	0.812568	1.25534	chr19	55662011	55662011	19q13.42	AC008735.2, U2AF2	3-hydroxypropylmercapturic acid levels in smokers
ZNF444	chr19	chr19:56150706-56151757	AGCTGACGGTGGCGCATAGACAGCTGACATCTGGGGGCGCTGCTGTGGATTGGGGTTTCTTGGCATCTGGTCTGTGGG	78	1051	13.4744	0	0	0	0	1071.86	1048	NA	1050	1204	1050	1049	1051	1051	64	34	0.996599	0.0656661	0.824682	1.24774	chr19	56145644	56145644	19q13.43	ZNF444	Heart rate response to beta blockers (atenolol monotherapy)
ZNF667	chr19	chr19:56444440-56446024	TGAGAAATCCACCCCCATGATCCAATCACCTCCCACAGACCCCACCTCCAACACTGAGGATTAAATTTCAACATGAGATTTGG	83	1584	19.0843	0	0	0	0	1497	756	1584	1501	1749	1584	1663	1583	1556	41	31	0.990286	0.0638908	0.809746	1.1775	chr19	56339799	56339799	19q13.43	AC006116.8, ZSCAN5A	Pediatric bone mineral density (hip)
LOC105372472	chr19	chr19:56744828-56745871	TGCAAGCAAAAGAAACTATCGTCAGAGTGAACAGGCGACCCACAGAATGGGAGGAAATTTT	61	1043	17.0984	0	0	0	0	1362.5	NA	1043	973	NA	1830	1466	1087	1776	80	34	0.999613	0.160995	0.585522	1.72225	chr19	56713651	56713651	19q13.43	OR5AH1P, AC006115.3	Western dietary pattern
ARID3A	chr19	chr19:950016-950418	GAGGCCGTCCCCAGAGGGAACGGATGGAT	29	402	13.8621	0	0	0	0	337.625	329	340	344	344	341	344	315	344	81	31	1.0101	0.0696897	0.793261	1.23608	chr19	950380	950380	19p13.3	ARID3A	Vertical cup-disc ratio
MRPS9	chr2	chr2:105054558-105055627	GCATTTTATTAAATATAGCGGGCCCCTTTTGGTATC	36	1069	29.6944	0	0	0	0	1169.62	1062	1154	1068	961	1508	1136	1579	889	370	179	0.997435	0.0590073	0.833299	1.23567	chr2	105194762	105194762	2q12.1	LINC01918 - GPR45	Depression in smokers
MIR4435-2HG	chr2	chr2:111223188-111225336	ACATTCGGGGGAAAGAGGACGAGTTCAGTTTTGCAGATGGCGTATTCTGGACATCCGGGAGAT	63	2148	34.0952	0	0	0	0	1872.25	2024	2154	2595	1898	1013	2149	931	2214	117	131	0.984251	0.0593566	0.805814	1.19166	chr2	111231795	111231795	2q13	MIR4435-2HG	Primary sclerosing cholangitis
TMEM87B	chr2	chr2:112113611-112115502	AAGATTCATAACTCTACAGAAAGATGTAGCATTACAGA	38	1891	49.7632	0	0	0	0	1824.62	1882	1754	1891	1891	1777	1774	1775	1853	797	445	0.983402	0.0575431	0.822741	1.1397	chr2	112126774	112126774	2q13	TMEM87B - FBLN7	Monokine induced by gamma interferon levels
FBLN7	chr2	chr2:112138727-112140354	CCAGGCCAGTGTCCCTCCCGCCTCTCT	27	1627	60.2593	0	0	0	0	1350.38	1513	1152	1473	1465	1227	1227	1227	1519	144	43	1.00114	0.0633865	0.792686	1.17942	chr2	112144650	112144650	2q13	FBLN7	Systemic juvenile idiopathic arthritis
PAX8-AS1	chr2	chr2:113235864-113236487	CGGCCTAGGACCGGAGGCGCGACCCCTCGGCCCACCTTGAGGCC	44	623	14.1591	0	390,46,78	0	0	644	623	623	623	617	805	615	623	623	19	9	1.01262	0.0662689	0.81299	1.23525	chr2	113235808	113235808	2q14.1	PAX8-AS1, PAX8	Blood urea nitrogen levels
LINC01191	chr2	chr2:114084256-114085200	CGCACCCACCAAATGTCCTACTGCCTGACACCTCTCCATAGACTTTGCAGAGAATACATCAGTTGGTCCTATCTAAATAAACCACAGCTTCTATAAGATGCCAA	104	944	9.07692	77737	0	0	0	1142.25	1262	944	1262	1262	944	1366	1154	944	393	168	0.986368	0.0625347	0.815727	1.20441	chr2	114183592	114183592	2q14.1	AC010982.1 - SEPHS1P7	Resistance to antihypertensive treatment in hypertension
MIR3681HG	chr2	chr2:12122522-12123423	ATATATATATACCC	14	901	64.3571	0	0	0	0	871.625	859	854	899	860	819	933	840	909	162	144	0.984006	0.0688595	0.770471	1.25277	chr2	12112224	12112224	2p24.3	MIR3681HG	Bronchopulmonary dysplasia
GPR39	chr2	chr2:132393772-132394792	CCCACTGCTCCTGAACACCCCACTGTACTT	30	1020	34	21150	0	0	0	1524.62	1023	962	992	1484	1968	1434	1513	2821	260	185	0.978742	0.0979086	0.648215	1.34174	chr2	132386819	132386819	2q21.2	FAM201B - RNU6-175P	Conduct disorder,Conduct disorder (symptom count)
XIRP2	chr2	chr2:166824524-166825960	TATATATTATAATATATATTTTATATA	27	1436	53.1852	62591	0	0	0	1579.17	1545	NA	1390	1428	1641	NA	1596	1875	511	0	0.982091	0.0733691	0.787219	1.28676	chr2	166880727	166880727	2q24.3	SCN7A - XIRP2	Interleukin-6 levels
KCNS3	chr2	chr2:17963128-17964640	GCATCCAGGAGAGATGACTGCAGAGGGTGTGTGTGTGTGTGTGTGTGT	48	1512	31.5	31260	0	0	0	1492.57	1517	1385	1508	1506	1510	NA	1510	1512	21	29	0.995744	0.0631577	0.822556	1.30689	chr2	17924672	17924672	2p24.2	KCNS3	Hepatitis A
LOC105373815	chr2	chr2:194048337-194050054	ATATATACATATATACATGT	20	1717	85.85	76397	0	0	0	1558.88	1586	1586	1536	1540	1587	1512	1588	1536	14	42	1.00736	0.0956603	0.556829	1.49219	chr2	194007459	194007459	2q32.3	AC068135.2 - AC068135.1	Bipolar disorder
DGKD	chr2	chr2:233396872-233397623	CCAGGGTGGCTGGGGGGGGCCAGAGTGAGAGGACACCAGAGGGGA	45	751	16.6889	0	0	0	0	920.5	1025	792	1211	782	780	777	784	1213	89	102	0.993206	0.0639704	0.820514	1.2204	chr2	233394759	233394759	2q37.1	DGKD	Total body bone mineral density
MLPH	chr2	chr2:237521725-237522691	GCTACAACTATAGTGCTGGAGCGGAGCAGGGCTGAGACTGGGGTTGGGCCTTCAAACACCT	61	966	15.8361	0	0	0	0	854.25	912	966	966	966	964	537	557	966	17	53	0.987606	0.0570942	0.816281	1.17985	chr2	237534583	237534583	2q37.3	MLPH	Prostate cancer
MLPH	chr2	chr2:237547291-237547882	GCAGTGCACAGAGGGCAGAGCCAGCCTGGGAGGGAGGAGCTCCCCGTGTTCAGGTGGAGTGGTTAGGAGTAGGA	74	591	7.98649	0	0	0	0	615.667	NA	NA	591	591	665	665	665	517	27	24	0.990793	0.057022	0.828314	1.23243	chr2	237534583	237534583	2q37.3	MLPH	Prostate cancer
LOC105373962	chr2	chr2:238776466-238777635	CAGCATGGAAAGAGGAAGGACGTTTGTCAGAGAAGTCACT	40	1169	29.225	32290	0	0	0	1840.62	1604	1440	1606	1169	2963	2479	2295	1169	225	204	0.990595	0.0634575	0.810036	1.18313	chr2	238772351	238772351	2q37.3	LINC01937 - AC145625.1	Blond vs. brown/black hair color
CROCC2	chr2	chr2:240907692-240909394	TGGGGTGAGCTCTACCTCCTCCACC	25	1702	68.08	9855	0	0	0	1077.29	1295	777	776	1449	NA	777	1140	1327	448	274	1.00975	0.0631058	0.806491	1.17602	chr2	240907156	240907156	2q37.3	CROCC2	Joint mobility (Beighton score)
CROCC2	chr2	chr2:240923443-240925037	ACTAACCCAGCCCCCAC	17	1594	93.7647	0	0	0	0	2454.67	2897	2570	1905	2109	NA	NA	2362	2885	93	24	1.01471	0.110192	0.67081	1.3524	chr2	240907156	240907156	2q37.3	CROCC2	Joint mobility (Beighton score)
CROCC2	chr2	chr2:240976134-240981320	GGCTCATCCCTGCTCAGTCTCTGGGGTAGGAGCCTCAGGAGCCCA	45	5186	115.244	0	0	0	0	4713.88	5509	3696	5136	4282	6137	4458	4214	4279	328	279	1.07469	0.141765	0.713304	1.55642	chr2	240907156	240907156	2q37.3	CROCC2	Joint mobility (Beighton score)
THAP4	chr2	chr2:241589949-241591268	TGATGATGATGGGCACTAGGACACTCAGAGCTGCTCGGC	39	1319	33.8205	0	0	0	0	3585.38	5609	2835	2840	2840	3933	3890	3896	2840	164	99	1.0005	0.0798525	0.791453	1.34965	chr2	241563541	241563541	2q37.3	BOK	Brain structure
LINC01237	chr2	chr2:241888415-241888762	CCCCCCCACCTGCTTCCTCCCGTCCTCCCTCTCACTGGCACCCCCCACCTGCTTCCTCCCATTCTCCCTCTTGCTG	76	347	4.56579	0	0	0	0	1687.33	1725	NA	NA	1411	2575	1472	1470	1471	25	11	0.995212	0.0659628	0.812213	1.25338	chr2	241937348	241937348	2q37.3	LINC01237, LINC01237	Myopia (age of diagnosis),Spherical equivalent or myopia (age of diagnosis)
LINC01237	chr2	chr2:241927624-241929620	CCACTCCACCCCACTCACAGGAGAGGGAC	29	1996	68.8276	0	0	0	0	2055.71	2409	NA	1987	1993	1990	1993	1992	2026	227	110	0.999812	0.154682	0.413975	2.08888	chr2	241937348	241937348	2q37.3	LINC01237, LINC01237	Myopia (age of diagnosis),Spherical equivalent or myopia (age of diagnosis)
LOC105373979	chr2	chr2:242082288-242083841	GGGTGATGAAATAATCTGTACAACAAACCCCCCAGACATGAGTTTACCTGTATAGCAAACCTGTACATGTA	71	1553	21.8732	0	0	0	0	1347.38	1553	1553	2044	2044	700	1264	917	704	19	37	0.988588	0.102851	0.496688	1.60787	chr2	242084344	242084344	2q37.3	LINC01880 - LINC01238	Coronary artery calcification
LOC105374833	chr2	chr2:83340871-83342594	ATATTAT	7	1723	246.143	48340	0	0	0	2736.88	2843	2857	2910	2910	2549	2617	2541	2668	1431	44	0.996186	0.123745	0.651454	1.47156	chr2	82959779	82959779	2p12	DHFRP3 - AC138623.1	Itch intensity from mosquito bite adjusted by bite size
RAD21L1	chr20	chr20:1258139-1260455	TAACTGATTTGAGATCTTCCCTCTTTTCTAATATAAACACATAAAGCTCTGTTTCCTTCTAGG	63	2316	36.7619	3962	0	0	0	2894.75	2756	2756	3134	2757	3067	2632	2988	3068	120	102					chr20	1240527	1240527	20p13	RAD21L1	Response to cytadine analogues (cytosine arabinoside)
SNPH	chr20	chr20:1301630-1302637	TCTAATTTCATCAATATTTCTATCACCTCAAAATAAACCCCATTCCCATTAGCAATCACCGCCAATT	67	1007	15.0299	0	0	0	0	2308.88	2141	1335	2143	3888	2145	3068	1805	1946	310	221	1.01282	0.129556	0.635979	1.58537	chr20	1296455	1296455	20p13	SNPH	Parental extreme longevity (95 years and older)
LOC107984088	chr20	chr20:1877011-1877239	TGTGTCCATCCCCCCGTATCCATCCCC	27	228	8.44444	0	0	0	0	4828.67	4614	NA	2499	3590	NA	2361	2432	13476	0	34	0.968164	0.112872	0.677654	1.47888	chr20	1913689	1913689	20p13	SIRPA	Blood protein levels
CFAP61	chr20	chr20:20354623-20358293	TGTGAGGGGAGGTGGTCACAC	21	3670	174.762	0	0	0	0	4880.5	4809	4695	5046	5165	4764	4890	4747	4928	1161	657	1.00267	0.0751181	0.788023	1.24709	chr20	20358666	20358666	20p11.23	CFAP61	Exploratory eye movement dysfunction in schizophrenia (total eye scanning length)
RBCK1	chr20	chr20:420666-420740	CCCATCCCCCACCCCCACC	19	74	3.89474	0	0	0	0	297.25	289	296	296	297	314	293	298	295	14	24	1.00701	0.0673116	0.78334	1.24863	chr20	393417	393417	20p13	TRIB3	Interleukin-4 levels,Platelet-derived growth factor BB levels
SLC2A10	chr20	chr20:46788838-46789480	AGGTGTGTGTTTATTGGATGTGAGCGTGTGGGTGTGC	37	642	17.3514	52553	0	0	0	2610.12	2468	2558	3262	2514	2522	2522	2521	2514	184	124	0.994666	0.0506999	0.82583	1.1731	chr20	46831684	46831684	20q13.12	SLC2A10 - RN7SKP33	Quantitative traits
LOC105372676	chr20	chr20:55532194-55533119	TGTATTATGTATGTATATACATGTATATTATACGTCATACATC	43	925	21.5116	44509	0	0	0	853.25	756	756	974	751	833	968	863	925			0.995153	0.0654024	0.806757	1.18627	chr20	55551451	55551451	20q13.2	AL160413.1 - CBLN4	Migraine without aura
MIR4532	chr20	chr20:57833596-57834455	GAAGGAGCCCTCGCTGGGA	19	859	45.2105	61347	0	0	0	890.25	894	896	896	897	892	894	894	859	159	64	1.00947	0.0624368	0.829484	1.24001	chr20	57853649	57853649	20q13.32	NKILA - MIR4532	Response to fenofibrate (adiponectin levels)
EDN3	chr20	chr20:59383835-59385152	GTGGGGAGGAGGTGA	15	1317	87.8	58289	0	0	0	1674	1397	2197	2170	1279	1689	1443	1521	1696	16	5	0.976781	0.0731141	0.761967	1.19471	chr20	59291787	59291787	20q13.32	ZNF831 - EDN3	Platelet distribution width
LOC105372698	chr20	chr20:60409194-60410615	CGTGGGACTCTTCTGTTAAACGATGTCTCTGAGACATGATACCGAT	46	1421	30.8913	8587	0	0	0	1554	1374	1737	1375	1113	1421	2478	1421	1513	229	185	0.992019	0.0619182	0.789473	1.20572	chr20	60441709	60441709	20q13.33	MIR646HG	Cough in response to angiotensin-converting enzyme inhibitor drugs
LOC105372699	chr20	chr20:60764130-60764414	CACACACACCTATACACACATT	22	284	12.9091	0	0	0	0	443.571	NA	470	470	421	466	394	462	422	89	87	0.987344	0.059968	0.806694	1.14837	chr20	60703639	60703639	20q13.33	MIR548AG2 - AL117372.1	Highest math class taken
HRH3	chr20	chr20:62212875-62213762	GGAAGGAGAGCGGGGATGGGGGGAAGGAGAGCGGGGATGGTGGGGGAAGGAGAGCAGGGATGGGGGGAAGGAGAGCGGGGAGTGGG	86	887	10.314	29	0	0	0	1033.57	NA	1000	797	1152	1008	1071	1021	1186	5	15	1.0008	0.0714786	0.774625	1.23074	chr20	62251748	62251748	20q13.33	OSBPL2	Femoral neck bone mineral density,Lumbar spine bone mineral density
LOC63930	chr20	chr20:63028907-63029372	GTCCCCCGGGCCTCCGCGCCTCCGTGTGCAG	31	465	15	0	0	0	0	1283.38	1331	1330	1301	1301	1305	1110	1234	1355	89	97	1.02683	0.0848398	0.732203	1.28678	chr20	63059658	63059658	20q13.33	LINC01749	Diverticular disease
LOC63930	chr20	chr20:63068440-63068769	CCTGCACCCCAGTCCCCACCCCCACAGCAGCAAAGGCAGCCCCAGCATTGACACCCAGCAGTGGGG	66	329	4.98485	0	0	0	0	1046.12	1045	1053	1055	1055	1051	1045	1054	1011	20	15	1.00755	0.0594556	0.843394	1.25476	chr20	63062254	63062254	20q13.33	LINC01749	Body mass index
MIR124-3	chr20	chr20:63167418-63167597	CTCAGACCCACCTCAGCCCCTCCTCAGCCCCCACCTCAGCCCCCAC	46	179	3.8913	10808	0	0	0	2678	NA	NA	2588	2584	NA	NA	NA	2862	17	10	0.980613	0.0845267	0.725807	1.28609	chr20	63142105	63142105	20q13.33	AL096828.2 - AL096828.1	Idiopathic dilated cardiomyopathy
CHRNA4	chr20	chr20:63359846-63359915	TGTGTGTGTGCCGGGCGTGCGCTCTGTGTG	30	69	2.3	0	0	0	0	869.833	709	785	870	870	NA	NA	735	1250	42	36	1.01586	0.0789667	0.749665	1.26721	chr20	63361348	63361348	20q13.33	CHRNA4, AL121827.1	Emphysema imaging phenotypes
STMN3	chr20	chr20:63641822-63642105	GCCCCTCCGAGCTCCGCCCCAGCCCCGCCCCCGCCCGTGCCCCGCCCCCTGCCGCGCTAGCCCCGCCCCCGCCCCGGCCCCT	82	283	3.45122	0	0	0	0	616.714	NA	606	658	658	552	571	554	718	22	7	1.05205	0.125865	0.653795	1.49358	chr20	63638397	63638397	20q13.33	MHENCR - STMN3	Cutaneous malignant melanoma
LOC107985387	chr20	chr20:641867-642435	GTTGCCTGGGGGGGGGGCCCAGCGGGGGTGGA	32	568	17.75	309	0	0	0	1135.25	1174	1353	1058	1114	1185	1503	594	1101	175	20	1.00785	0.061946	0.826849	1.19254	chr20	614136	614136	20p13	TCF15 - SRXN1	Autism spectrum disorder, attention deficit-hyperactivity disorder, bipolar disorder, major depressive disorder, and schizophrenia (combined)
NPBWR2	chr20	chr20:64117278-64119232	AAGCTGTGCGGGGCATGAGGGCACCCTGATGTTGGGGGGGGTGTCTGGGCA	51	1954	38.3137	12253	0	0	0	2035.88	2170	2167	2166	1947	1949	1924	2028	1936	370	169	1.01623	0.0854008	0.780134	1.34313	chr20	64106215	64106215	20q13.33	NPBWR2, MYT1	Body mass index
PLCB4	chr20	chr20:9188476-9189532	TAGTGACATTCTGGGTTGGTTAACTGTTCATTGTGGAGGGCTGTCATA	48	1056	22	0	0	0	0	1298.88	1680	1678	1379	1007	1391	1008	1240	1008	188	218	0.982669	0.0686254	0.74993	1.21957	chr20	9384656	9384656	20p12.2	PLCB4	Neutrophil count
USP25	chr21	chr21:15836451-15837432	GCAAACTTACCTGAATACTGTTGTTGAGATTTTCAGCCAGCCATCCTTTGCTGTCAGTGTGTGGATCAGAGTGAGTAGGGGA	82	981	11.9634	0	0	0	0	1012	981	980	980	981	1226	981	986	981	121	112	0.984244	0.0604497	0.778837	1.16779	chr21	15754675	15754675	21q21.1	USP25	QRS complex (12-leadsum)
MIR99AHG	chr21	chr21:16577291-16577696	TATATAATATATGTAAATTGTACA	24	405	16.875	0	0	0	0	370.875	388	405	375	405	352	309	352	381	151	38	0.993864	0.0660138	0.800514	1.19851	chr21	16671610	16671610	21q21.1	MIR99AHG - RNU1-98P	Systolic blood pressure
KCNJ6	chr21	chr21:37756583-37757738	TCCAGCCCGGAGTGAGCACTCCCTCACAGTGTGATGAT	38	1155	30.3947	0	0	0	0	1462.62	1270	1455	873	1494	1702	1929	1702	1276	30	42	0.988168	0.0567311	0.827443	1.20555	chr21	37739137	37739137	21q22.13	KCNJ6	Highest math class taken (MTAG),Self-reported math ability,Self-reported math ability (MTAG)
DSCAM	chr21	chr21:39974555-39975151	ATAGGTGTTGGCCTCCTTTTCCTATTGCCTTCTCCTCTATGCCTGTGTCTGAAATTGCCCTCCACCCTTCTCTT	74	596	8.05405	35774	0	0	0	3040	NA	2782	1332	3862	NA	3263	3388	3613	54	425	0.990227	0.100308	0.694242	1.37658	chr21	39972984	39972984	21q22.2	PCP4 - DSCAM	Smoking initiation
COL18A1	chr21	chr21:45437087-45438388	ACACAGGCACTCTCCTGCACACACACTCACACACAGA	37	1301	35.1622	0	0	0	0	1152.57	NA	1119	1317	1108	611	1363	1365	1185	312	11	1.01298	0.0678802	0.764842	1.31906	chr21	45427029	45427029	21q22.3	COL18A1	Hippocampal atrophy
LOC100129027	chr21	chr21:45797606-45799168	ATGGATGAATGCATGGATCCATAGAGAGAGTGAATGATGTGCATGGATGAATGCATGGATCCATAGAGAGAGTGAATGGATGTGC	85	1562	18.3765	28825	0	0	0	4565.25	4455	4622	4455	4622	4625	4540	4581	4622	478	58	0.997311	0.0521545	0.814304	1.24342	chr21	45791171	45791171	21q22.3	PCBP3	Schizophrenia
PCBP3	chr21	chr21:45923773-45925223	GGAACAGTCGAGTGGGTAGAAACAGCACACGTAAGATCGGGTGTGCACGAGGAGATGCGAACACCG	66	1450	21.9697	0	0	0	0	2770	3626	3492	2769	1516	2875	2886	1434	3562	11	27	1.00147	0.0693853	0.785914	1.31122	chr21	45936445	45936445	21q22.3	PCBP3	Macrophage inflammatory protein 1b levels
LSS	chr21	chr21:46192488-46194015	GCACAGATGGGATGCTGTGGGTGCATCTGCATGTGTGTACACAGGTGCCTGTGCATGTGTACGTGTGTGCATAGACCTGTGTGTGCATCTGTCTCCATGTACCTATGTCTGTGTGTG	117	1527	13.0513	0	0	0	0	1531.5	1533	1533	1533	1533	1529	1529	1529	1533	270	60	1.01642	0.0650378	0.778345	1.28881	chr21	46266299	46266299	21q22.3	MCM3AP	Blood protein levels
CECR5	chr22	chr22:17146290-17147834	CCACACCTGTGACGCCCTCCTGTGAGCTTACCGGCCTTCGATCACACGCCATCGCACACGCC	62	1544	24.9032	0	0	0	0	1516.38	1545	1543	1541	1482	1476	1528	1472	1544	9	7	1.0105	0.0657622	0.799289	1.30158	chr22	17137274	17137274	22q11.1	LINC01664 - HDHD5	Blood protein levels
LINC00895	chr22	chr22:19612461-19613008	TATGTACCTATCCATCCACCTGTCTATTCGTGTATG	36	547	15.1944	45723	0	0	0	555.75	547	547	547	583	547	582	546	547	81	111	1.00104	0.0535913	0.823583	1.1579	chr22	19623159	19623159	22q11.21	LINC00895 - AC000077.1	Acute kidney injury in critical illness
TCN2	chr22	chr22:30623802-30624052	ATACACATATATACACACACATATAT	26	250	9.61538	0	0	0	0	527	355	707	660	675	478	490	480	371	26	6	0.995368	0.0592076	0.802632	1.19889	chr22	30617309	30617309	22q12.2	TCN2	Wilms tumor
TMPRSS6	chr22	chr22:37097629-37098138	GCCACCGTCCTGTAACGGAGGGGCAGGAGCGG	32	509	15.9062	0	0	0	0	867	830	829	923	856	921	858	828	891	113	34	1.00395	0.0611387	0.826622	1.19409	chr22	37100807	37100807	22q12.3	TMPRSS6	Mean corpuscular hemoglobin
TMEM184B	chr22	chr22:38229565-38230249	AGGCTACTCTAGACCACAGGGAGGTCAGCCCAGGAAGCTAGAGCGGCTGGATTGCCA	57	684	12	0	0	0	0	683.75	740	570	741	684	683	684	684	684	54	15	0.995742	0.0633571	0.839066	1.20453	chr22	38232300	38232300	22q13.1	TMEM184B	Mammographic density (dense area),Percent mammographic density
MIRLET7BHG	chr22	chr22:46095236-46095987	CAGGTGAGGGCATTGGGGTGGTCCCAGCCAGCCCAGGGCGG	41	751	18.3171	0	0	0	0	778.5	910	906	877	869	605	603	588	870	126	36	1.00742	0.0696363	0.798494	1.26788	chr22	46077965	46077965	22q13.31	MIRLET7BHG	Schizophrenia
GRAMD4	chr22	chr22:46635062-46635797	CCCCCGGCCACTCCTGTCCTGGGGAACCGTGTCCTCCCTGCCCCCG	46	735	15.9783	0	0	0	0	1038.38	838	1196	1341	1121	932	789	795	1295	258	12	1.01184	0.071006	0.809194	1.25783	chr22	46586396	46586396	22q13.31	GRAMD4	Urate levels in obese individuals
TBC1D22A	chr22	chr22:46858952-46860693	GACCAGAATCCTTTTCCATAGAGGTCCGCGCAGTGCTGTGCCCCTTCCCGG	51	1741	34.1373	0	0	0	0	1870.75	1729	1774	1634	1910	1784	1383	3027	1725	108	98	1.00034	0.0698806	0.80555	1.26057	chr22	46923312	46923312	22q13.31	TBC1D22A	Cerebrospinal fluid p-Tau181p:AB1-42 ratio,Cerebrospinal fluid t-tau:AB1-42 ratio
FAM19A5	chr22	chr22:48678879-48679750	TCCCGGCTCCCCGTCCATCCCTC	23	871	37.8696	0	0	0	0	1131.38	1145	1305	1122	1124	1032	1123	1056	1144	254	100	1.0005	0.0649236	0.807413	1.25195	chr22	48779197	48779197	22q13.32	FAM19A5	Egg allergy (parent-of-origin effect)
LINC01310	chr22	chr22:48862193-48863121	AAATGCCAACTGCATCCATCGTGTGCACTAATACACACCT	40	928	23.2	3757	0	0	0	930	848	847	848	1427	848	846	848	928	178	116	1.00388	0.0618347	0.810621	1.22136	chr22	48894738	48894738	22q13.32	LINC01310	Response to quetiapine in schizophrenia
PANX2	chr22	chr22:50168089-50169106	TTATCTGGGGTGACTGGG	18	1017	56.5	2183	0	0	0	941.167	NA	1015	867	NA	1016	865	867	1017	34	21	1.03395	0.0731775	0.824189	1.27239	chr22	50190508	50190508	22q13.33	TRABD	Platelet count,Plateletcrit
ARSA	chr22	chr22:50643626-50644316	CTTAGGAGCAGTTTAGGGAGGATCAGAATCTGCACTGATCTTA	43	690	16.0465	15344	0	0	0	4099.29	4192	4185	NA	4193	4029	4029	4029	4038	168	219	0.99023	0.0600037	0.791374	1.19505	chr22	50656858	50656858	22q13.33	ARSA - RF00019	Intelligence (MTAG)
NUP210	chr3	chr3:13377670-13377963	GCCCCACACCACCCACCTGCAG	22	293	13.3182	0	0	0	0	301.125	359	293	293	293	292	293	293	293	52	27	0.993018	0.05586	0.828187	1.16832	chr3	13376883	13376883	3p25.1	NUP210	Self-reported math ability (MTAG)
PCCB	chr3	chr3:136299375-136299886	TATGTATATGTATGCATGTG	20	511	25.55	0	0	0	0	479.5	430	509	509	434	509	435	499	511	37	51	0.995639	0.0577279	0.834857	1.1671	chr3	136301699	136301699	3q22.3	PCCB	Total bilirubin levels
LOC105374243	chr3	chr3:182116983-182117480	GTGTGTGTGTATTC	14	497	35.5	31968	0	0	0	494	499	499	499	499	469	494	494	499	203	201	0.987202	0.0565222	0.844261	1.16661	chr3	182133496	182133496	3q26.33	AC012081.1	Estradiol plasma levels (breast cancer)
LOC105374299	chr3	chr3:195815745-195817593	GTGCCACATCCTCCTGCCCAGCCCGGCCTCCTTCTCCTTACCAG	44	1848	42	0	0	0	0	2337.43	2247	2112	1848	2250	2698	2553	2654	NA	41	23	1.00913	0.0679111	0.819955	1.26779	chr3	195829508	195829508	3q29	MUC4 - LINC01983	Facial morphology (factor 17, height of vermillion upper lip)
LOC105374308	chr3	chr3:197436089-197438625	TTAGAGTGGAGCCCTGCTGGCTCTCCATAATCCGTGTCTGGGG	43	2536	58.9767	0	0	0	0	2904.38	2533	2536	2536	2447	3905	3482	3260	2536	115	107	1.02549	0.111499	0.67787	1.61549	chr3	197409951	197409951	3q29	DLG1-AS1 - AC128709.2	Frontotemporal dementia with GRN mutation
LOC107986068	chr3	chr3:20854575-20856276	TCATTGTCACCCCAGAG	17	1701	100.059	48298	0	0	0	1785.88	1776	1880	1647	1775	1877	1778	1778	1776	811	573	0.997507	0.111042	0.696447	1.6044	chr3	20899351	20899351	3p24.3	SGO1-AS1	Proteinuria and chronic kidney disease
CNTN4	chr3	chr3:2453975-2454799	ATTGAAGTGATTTCTGTGCTTGTTGCATGGATATCCTCAGAATTCTATAGCATTCTGACAGGGTAGATATAATCAGCCCCATATTATAAGCAAAGAACCTGAGGCTCGAAGAAGCTAACTTGCCTGTTGTTACATGGCAAGAGTATGGCCAGAATTCAAGTCTAGGTTGTTTAAGTTCCAAAGTCTACGTGCTTGTTTCCTACTCCATTAGTGATCTTACCTCTCCTCTAGGATACCTTTCATATTAATTTGATACTCAGTAAGTATTTCATG	273	824	3.01832	0	0	0	0	619.25	824	552	551	823	551	551	551	551	13	14	0.982266	0.0682626	0.800215	1.23109	chr3	2444285	2444285	3p26.3	CNTN4	Blood pressure (smoking interaction)
ARPP21	chr3	chr3:35563939-35564693	ATATATTTAT	10	754	75.4	74255	0	0	0	555.75	552	552	675	554	507	502	505	599	52	5	0.97578	0.0640962	0.792314	1.20373	chr3	35598334	35598334	3p22.3	RNU6-243P - ARPP21	Asthma (childhood onset)
STAC	chr3	chr3:36300302-36301260	ATATATGTGTGTGTATGTATATGTACACACACACATATACATATATGTGTGTATGTATATGTACACACACACATATACATATAGTGTGTGTATGTATATGTACATACACATATATAC	117	958	8.18803	79354	0	0	0	1144.5	1168	1206	1218	1222	956	956	956	1474	0	6	1.00413	0.0783504	0.785643	1.26752	chr3	36273709	36273709	3p22.3	RFC3P1 - STAC	Adolescent idiopathic scoliosis
DLEC1	chr3	chr3:38087249-38087640	CAGCACTGACACCATCCATCAGCACTCACACCATCCAT	38	391	10.2895	0	0	0	0	388.286	391	NA	391	391	391	391	391	372	317	148	0.990842	0.0582431	0.818258	1.22068	chr3	38116856	38116856	3p22.2	ACAA1, DLEC1	Common carotid intima-media thickness in HIV negative individuals
MYRIP	chr3	chr3:40084265-40085261	ATAATACACATCTATGTATTATATATCGATAG	32	996	31.125	0	0	0	0	1533.75	1363	1692	1472	1497	1263	2004	1323	1656	24	52	0.999873	0.0691288	0.776159	1.26034	chr3	40055127	40055127	3p22.1	MYRIP	Sleep-related phenotypes
LOC105376922	chr3	chr3:482785-483589	AGCGGCGAGGCTGAGGCGCGGGAACTGCGTGACCCCGGAGGCGGAGGTCGCAGTGAGCAGAGGCCGCCGCACTCCAGCCCGGGCGACGG	89	804	9.03371	10	0	0	0	610.25	625	623	537	626	593	626	626	626	51	19	0.996879	0.0627103	0.837838	1.32547	chr3	393460	393460	3p26.3	CHL1	Colonoscopy-negative controls vs population controls
LOC107986102	chr3	chr3:75612184-75612543	GTGTACACCCCCTGCGATATTGGGAGTGACATCATCCTCTCCTCCCTGGATATTAAGAACAATGTCACAAGAGG	74	359	4.85135	9143	0	0	0	359.75	359	374	358	359	351	359	359	359	15	9	1.03005	0.116494	0.677748	1.84115	chr3	75344942	75344942	3p12.3	MYLKP1 - OR7E66P	QT interval
RNF212	chr4	chr4:1053483-1055478	AGTCAGCTCCCGGAGGGGAC	20	1995	99.75	691	0	0	0	1534	1993	1994	1474	NA	1513	1143	1144	1477	365	200	1.02234	0.0645631	0.849381	1.24645	chr4	1052183	1052183	4p16.3	AC019103.1 - RNF212	Heel bone mineral density
LOC107986234	chr4	chr4:108691705-108692052	ACACATATATATGTGTATATATATAAAATATAT	33	347	10.5152	308	0	0	0	343.625	317	391	310	391	316	316	316	392	14	34	0.990208	0.062403	0.755191	1.181	chr4	108706869	108706869	4q25	OSTC - ETNPPL	Amyotrophic lateral sclerosis (sporadic)
MIR297	chr4	chr4:110883645-110884289	CATATATATATATCTCC	17	644	37.8824	23059	0	0	0	498.25	555	597	491	546	428	320	428	621	85	89	0.988692	0.0683673	0.810302	1.4234	chr4	110885393	110885393	4q25	MIR297 - LYPLA1P2	Periodontitis
LOC107986180	chr4	chr4:12107886-12109683	CATATATAT	9	1797	199.667	15464	0	0	0	1899.25	1733	1703	1810	1709	2415	1767	2346	1711	293	194	1.00323	0.0959414	0.633801	1.39146	chr4	12109925	12109925	4p15.33	AC108037.1 - LINC02270	Metabolite levels (MHPG)
LOC101927109	chr4	chr4:126100828-126101466	ATATATACGT	10	638	63.8	28502	0	0	0	680.714	584	674	794	477	NA	790	724	722	57	171	0.992396	0.073957	0.810011	1.32516	chr4	126075715	126075715	4q28.1	LINC02379 - AC105758.1	Response to Homoharringtonine (cytotoxicity)
LOC105377422	chr4	chr4:131201380-131202295	AGTAGATAGAGGTCAAAGATACTGCTGTGAAATATCCTAC	40	915	22.875	65051	0	0	0	741.25	675	908	675	715	715	892	675	675	350	169	0.985149	0.0662127	0.701811	1.22086	chr4	131174124	131174124	4q28.3	AC025554.1 - RNU6-224P	Venous thromboembolism adjusted for sickle cell variant rs77121243-T
SLC10A7	chr4	chr4:146285751-146287250	TTTGGAGTGGTGAGAAGGACTGTG	24	1499	62.4583	0	0	0	0	3456.6	NA	3203	NA	NA	3805	3181	3891	3203	1035	689	0.976565	0.0686498	0.795634	1.22005	chr4	146438979	146438979	4q31.22	SLC10A7	Serum dimethylarginine levels (asymmetric/symetric ratio)
MIR548G	chr4	chr4:147350201-147350805	AAGAAGGA	8	604	75.5	5619	0	0	0	563.833	556	566	NA	NA	553	544	548	616	203	143	0.984589	0.116195	0.678305	1.4179	chr4	147359849	147359849	4q31.22	MIR548G - AC010683.1	Coronary artery disease,Myocardial infarction
QDPR	chr4	chr4:17459168-17460016	TTATGTATACATATGTATTATATACGCACAGC	32	848	26.5	26519	0	0	0	784.625	688	879	848	683	743	842	784	810	115	88	0.988272	0.0601821	0.824914	1.22915	chr4	17433467	17433467	4p15.32	RPS7P6 - QDPR	Response to platinum-based chemotherapy (carboplatin)
TLR3	chr4	chr4:186056591-186058192	TCCACCTCCCAGCCA	15	1601	106.733	11127	0	0	0	1949	NA	NA	2143	3128	1698	NA	1700	1076	0	0	0.984291	0.0630274	0.808088	1.21609	chr4	185965584	185965584	4q35.1	SORBS2 - RNU4-64P	Vaginal discharge (smell)
F11-AS1	chr4	chr4:186371233-186372472	GCATGGTGAATAACACACCGGCCAGTACACAGCATCCACTCGGGAGTGACGC	52	1239	23.8269	0	0	0	0	1389.25	1441	1004	1340	1394	1239	1600	1444	1652	123	50	0.996107	0.0575873	0.826541	1.17629	chr4	186336422	186336422	4q35.2	F11-AS1	Response to statin therapy
LOC102723906	chr4	chr4:186959310-186973478	GGAAGAGGCAGGCGACATGCGAGTGCTGGAGAGGAACCCCGGACGCCACCATTTCACAT	59	14168	240.136	0	0	0	0	6899.67	NA	NA	3463	7326	6618	2935	6972	14084	408	22	1.00144	0.213139	0.392524	1.6912	chr4	186982889	186982889	4q35.2	AC110772.1	Lobe attachment (rater-scored or self-reported)
LOC105377614	chr4	chr4:189465304-189467284	CTAAGCATCCTGGGGGTGGAG	21	1980	94.2857	73517	0	0	0	2001	2021	NA	1961	2022	1979	2023	1979	2022	595	238	0.990381	0.0783197	0.746176	1.26053	chr4	189656840	189656840	4q35.2	HSP90AA4P - LINC01262	Velopharyngeal dysfunction
LOC105377615	chr4	chr4:189490553-189492053	GCTGACCCTCACTGGTGTGGGTGGGCTGTG	30	1500	50	59330	0	0	0	1449.5	1498	1499	1560	1498	1288	1463	1290	1500	115	176	0.998854	0.103303	0.724033	1.29534	chr4	189656840	189656840	4q35.2	HSP90AA4P - LINC01262	Velopharyngeal dysfunction
RBPJ	chr4	chr4:26209542-26209883	CCTTCCTCCTTCCCTCTCTCCCTC	24	341	14.2083	0	0	0	0	1230.25	1271	1271	1594	785	NA	NA	NA	NA	645	232	1.00694	0.121343	0.684034	1.59414	chr4	26135397	26135397	4p15.2	AC097714.1 - RBPJ	Obesity-related traits
RBPJ	chr4	chr4:26244129-26244532	ATGTATACACATATGTGTATACATATATGTGTGTATAT	38	403	10.6053	0	0	0	0	927.714	946	946	936	866	NA	896	958	946	69	130	1.00456	0.0680853	0.814316	1.22445	chr4	26329811	26329811	4p15.2	RBPJ	Heel bone mineral density
NOP14	chr4	chr4:2960641-2961301	TATTAATA	8	660	82.5	0	0	0	0	791.5	828	812	1050	789	825	768	771	489	471	39	0.99795	0.0765526	0.709761	1.2323	chr4	2881445	2881445	4p16.3	ADD1	Educational attainment (MTAG),Educational attainment (years of education)
RGS12	chr4	chr4:3308975-3310354	GAATGGCAGGTGTCCTCTGAGGGGAACCGTGCAGGGGAGGAGCTGGGACCTGG	53	1379	26.0189	0	0	0	0	1608.5	1698	788	1695	1753	1902	1482	1852	1698	37	24	1.00712	0.0578825	0.815366	1.208	chr4	3285325	3285325	4p16.3	MSANTD1 - RGS12	Blood protein levels
LINC00955	chr4	chr4:3612902-3613872	ACAGCACATGCATCATACATGCAACACACCACACACATACAGCACACAC	49	970	19.7959	22230	0	0	0	807.571	935	770	926	728	728	NA	728	838	0	0	1.00504	0.0601529	0.823374	1.20144	chr4	3494956	3494956	4p16.3	DOK7	Blood protein levels
LOC105374357	chr4	chr4:3642059-3642564	GGCTCTCGCGTGCTCTGCGGGTCGGTTTCCGG	32	505	15.7812	2575	0	0	0	513.286	505	501	507	505	568	502	NA	505	61	28	1.01131	0.0615827	0.855548	1.21349	chr4	3494956	3494956	4p16.3	DOK7	Blood protein levels
SMIM14	chr4	chr4:39619160-39619789	TAATTTATTCTATATATCAATAAATA	26	629	24.1923	0	0	0	0	579	552	629	617	618	531	501	529	655	427	27	0.984145	0.0602127	0.79309	1.23038	chr4	39618250	39618250	4p14	SMIM14	Colorectal cancer
LOC105377666	chr4	chr4:56685865-56686171	TATATAT	7	306	43.7143	0	0	0	0	368.667	NA	NA	397	397	362	334	342	380	152	12	0.991139	0.0618983	0.783543	1.23284	chr4	56691923	56691923	4q12	HOPX - RPL17P20	Systemic sclerosis
LOC105377248	chr4	chr4:60595323-60595743	ATATAGATATGT	12	420	35	154754	0	0	0	453.875	435	504	420	420	442	488	502	420	25	14	0.981871	0.0723297	0.773788	1.23852	chr4	60696372	60696372	4q13.1	AC097655.1 - LINC02496	Childhood ear infection
ADAMTS3	chr4	chr4:72455808-72456394	TATATATTTTATATATAGTATATATACTGTATATACTA	38	586	15.4211	0	0	0	0	1584.75	1498	1409	1620	1452	2334	1413	1446	1506	87	2	0.982322	0.0714196	0.797251	1.2028	chr4	72456848	72456848	4q13.3	ADAMTS3	Lipid metabolism phenotypes
GPAT3	chr4	chr4:83648980-83650035	ATATATATATTTTTGAGAAATATATATG	28	1055	37.6786	43430	0	0	0	977.75	991	929	929	1003	1054	967	1008	941	74	5	0.982509	0.062406	0.790418	1.16362	chr4	83549680	83549680	4q21.23	GPAT3	Breast cancer
LOC100133050	chr5	chr5:100338749-100339234	ATATATATGTATGTATATGTATACC	25	485	19.4	40176	0	0	0	584.5	546	483	624	631	494	655	589	654	57	44	0.991178	0.0719361	0.76621	1.23905	chr5	100655944	100655944	5q21.1	AC027315.1	Panic disorder
LOC107986438	chr5	chr5:101309845-101310206	ATATATACACACGCACAGTACGTATATATGGT	32	361	11.2812	35793	0	0	0	474.714	361	543	437	359	617	358	648	NA	86	67	0.986343	0.0657774	0.809994	1.19333	chr5	101315939	101315939	5q21.1	ST8SIA4 - RN7SL802P	Hepatitis A
NKD2	chr5	chr5:1022150-1026623	TGTCCCTGCTCTTCCCACCCGCTGTGGGCGTCCCAGCCCAT	41	4473	109.098	0	0	0	0	3044	3775	3745	2796	3769	2907	2174	2175	3011	28	45	1.0428	0.0966975	0.776857	1.40494	chr5	1025534	1025534	5p15.33	NKD2, NKD2	Red cell distribution width
LOC107986439	chr5	chr5:106074904-106075870	ATATAATATATATTAT	16	966	60.375	674201	0	0	0	1087	1188	1143	1118	996	964	1024	1069	1194	265	2	0.978062	0.0735296	0.800154	1.28414	chr5	106083812	106083812	5q21.3	RNA5SP189 - AC027313.1	Obesity-related traits
SLC12A7	chr5	chr5:1069968-1073314	CAGCACACGGGCATCACACTTATGCAGCCCCCAGTGAGCCCC	42	3346	79.6667	0	0	0	0	2643.88	2972	1225	1760	1938	1881	3865	4816	2694	14	66	1.01112	0.123716	0.590772	1.46241	chr5	1068885	1068885	5p15.33	SLC12A7, SLC12A7	Mean corpuscular hemoglobin concentration
SLC12A7	chr5	chr5:1081989-1083320	CTGGAAAGTCCGGGCTTCCCGTCTCGGGTT	30	1331	44.3667	0	0	0	0	1557.88	1331	2086	1332	1604	2116	1331	1331	1332	99	79	1.01816	0.0710722	0.831899	1.28499	chr5	1080019	1080019	5p15.33	SLC12A7, SLC12A7	Mean corpuscular hemoglobin concentration,Mean corpuscular volume
PJA2	chr5	chr5:109352765-109354589	AGATATCTATATATT	15	1824	121.6	0	0	0	0	2051	1796	1775	1861	1832	2739	1785	1584	3036	211	87	0.986588	0.0769441	0.784752	1.24925	chr5	109343446	109343446	5q21.3	PJA2	Heel bone mineral density
KCNN2	chr5	chr5:114379423-114379855	ATATTAT	7	432	61.7143	0	0	0	0	401.625	432	493	325	432	339	409	351	432	351	31	0.987814	0.0618709	0.803089	1.1532	chr5	114400719	114400719	5q22.3	KCNN2	Atrial fibrillation
CTNND2	chr5	chr5:12056750-12058025	ATCAGATTACAATGTGTGGAGTGTGAATAAAA	32	1275	39.8438	153220	0	0	0	1308.62	1270	1307	1307	1298	1371	1270	1371	1275	501	392	0.976041	0.0636037	0.81327	1.22832	chr5	12184497	12184497	5p15.2	CTNND2 - RNU6-679P	Predicted suicide risk
CLPTM1L	chr5	chr5:1339051-1339995	TGCCCGGGACAGCAGGGTCAGCGCCCTAACCTGTGAACAGATGGCCACACAGACGGGCAAACTG	64	944	14.75	0	0	0	0	967.5	941	942	944	944	1136	945	944	944	8	8	1.00717	0.0602121	0.810425	1.26839	chr5	1340986	1340986	5p15.33	CLPTM1L	Non-melanoma skin cancer
PLEKHG4B	chr5	chr5:140726-141242	CCCCACACCCTCCCCTGCACA	21	516	24.5714	0	0	0	0	1251.75	1228	1235	1245	1242	1089	1415	1340	1220	224	52	0.993164	0.0672956	0.810211	1.45429	chr5	95949	95949	5p15.33	PLEKHG4B	Asthma (childhood onset)
SLC6A3	chr5	chr5:1422352-1423382	TGCTGGGTACCCACCGCTGCCCACAGTGCTGCCCACGG	38	1030	27.1053	0	0	0	0	1637.5	1030	2312	1026	1026	2159	2278	2239	1030	23	62	1.00667	0.0851531	0.737128	1.30101	chr5	1453229	1453229	5p15.33	SLC6A3 - LPCAT1	Breast cancer
LPCAT1	chr5	chr5:1458803-1459780	TGAGCATGTGTGTACAGTGTAAGCCTCAGCATGAGTGCATG	41	977	23.8293	1798	0	0	0	813.375	977	790	790	790	790	790	790	790	566	559	1.00402	0.0571364	0.846637	1.18051	chr5	1453229	1453229	5p15.33	SLC6A3 - LPCAT1	Breast cancer
LOC107986397	chr5	chr5:1539461-1540239	GGCCACACAG	10	778	77.8	9737	0	0	0	2034.12	2155	1925	2175	2158	1822	2136	1814	2088	557	574	1.00198	0.0625218	0.829721	1.17605	chr5	1518964	1518964	5p15.33	LPCAT1	Lung cancer in ever smokers
LOC105377699	chr5	chr5:162906080-162906687	ACATATAGGTATATATGTGTGGGTACAC	28	607	21.6786	98854	0	0	0	814.5	705	663	1256	1256	711	663	687	575	579	160	1.00106	0.0696817	0.825787	1.19487	chr5	162924846	162924846	5q34	AC113414.1	Body mass index
TENM2	chr5	chr5:167350552-167351216	ATATATATGGGATATATACATATGGAT	27	664	24.5926	0	0	0	0	681.714	651	656	NA	689	724	664	664	724	79	108	0.983417	0.0651023	0.770563	1.19768	chr5	167361221	167361221	5q34	TENM2	Myringotomy
DOCK2	chr5	chr5:169833884-169834759	CTCTCCAGCTAAATGTCCCAACCAGATCACCCTGCAGTAAGCTCACAGACCACAAGCCCTACTCACATGCTCAGTCAGTG	80	875	10.9375	0	0	0	0	905	875	875	875	875	955	955	955	875	146	172	0.989223	0.057087	0.78924	1.21312	chr5	169844145	169844145	5q35.1	DOCK2	Platelet-derived growth factor BB levels
LOC285696	chr5	chr5:17101111-17101760	TTGTGTAAACACATCACCTAGCATCACGTTAGGTGTGAGACTGATGCTGAGGCT	54	649	12.0185	28322	0	0	0	696.125	1027	648	649	649	649	649	649	649	135	206	1.02691	0.1178	0.687843	1.67174	chr5	17148802	17148802	5p15.1	BASP1-AS1, BASP1	Hippocampal atrophy
UNC5A	chr5	chr5:176859075-176859852	CCTTGCTAGAGGGCATAGCTGCTAGAATGT	30	777	25.9	0	0	0	0	513.625	472	476	477	477	536	657	537	477	186	152	1.01133	0.0624021	0.813861	1.19315	chr5	176897728	176897728	5q35.2	HK3	Educational attainment (MTAG),Educational attainment (years of education),Uterine fibroids
PROP1	chr5	chr5:177978833-177980671	GTGTGTGTGTGTGTGTGTGTGTGTGTGAAAGACAGACACAGAGCACGTGGGAGCTCATTTCTCCCTG	67	1838	27.4328	11465	0	0	0	2703.83	1887	2441	2504	2967	3213	NA	3211	NA	92	505	1.02918	0.203816	0.256407	2.02102	chr5	178179418	178179418	5q35.3	AC136632.2 - GMCL2	Plateletcrit
COL23A1	chr5	chr5:178559389-178559952	CAAAAGTCACCTTTCCCTGCACGTCGAGAAGTCTGAGACACATCACC	47	563	11.9787	0	0	0	0	562.625	563	563	563	562	563	561	563	563	70	65	0.996416	0.0610393	0.805515	1.18105	chr5	178541914	178541914	5q35.3	COL23A1	Prostate cancer
COL23A1	chr5	chr5:178585377-178585741	GGGTAACACTCCACAGCCCTGGTTGATGTG	30	364	12.1333	0	0	0	0	3449.75	4009	9990	4061	4101	1132	1740	1578	987	357	147	1.02303	0.273503	0.33088	1.74122	chr5	178590333	178590333	5q35.3	COL23A1	Bacterial meningitis
LOC102725231	chr5	chr5:180485785-180486510	ACGTGGACCTCGGGCCTCTGCCTCTTTCTTCCTTGCTGCTTCT	43	725	16.8605	0	0	0	0	798.5	1021	725	725	725	721	724	725	1022	205	110	0.998021	0.0609529	0.845223	1.17518	chr5	180456302	180456302	5q35.3	RNU6-525P - CNOT6	Adolescent idiopathic scoliosis
BTNL9	chr5	chr5:181045778-181046347	TCCTCCACCATCTCCCCAGCCCCCAACACC	30	569	18.9667	0	0	0	0	3490.6	1819	2330	NA	NA	NA	3545	4605	5154	883	124	0.963518	0.113021	0.662295	1.2979	chr5	181012650	181012650	5q35.3	RNU6-1036P - BTNL9	Blood protein levels
LOC105374618	chr5	chr5:2145284-2147058	ACGACCTAATCACTTCCAGATCCTCCACCTCCTCACCATC	40	1774	44.35	26397	0	0	0	4870.5	5907	7558	6354	5987	1660	1661	5868	3969	1557	481	0.990217	0.110139	0.608362	1.39029	chr5	2149096	2149096	5p15.33	AC126768.3 - RF00019	Cognitive function
CDH9	chr5	chr5:26235248-26236725	CAGGTGTTGTGGTGGG	16	1477	92.3125	644517	0	0	0	1535.17	1522	1570	1502	NA	NA	1497	1554	1566	370	176	1.02843	0.110588	0.668361	1.55378	chr5	26238444	26238444	5p14.1	RNU4-43P - AC025475.1	Interferon gamma levels
LINC01377	chr5	chr5:3276087-3276452	GAAGGAGGGAGGGGAG	16	365	22.8125	94771	0	0	0	1831.6	NA	1854	2793	NA	1541	NA	1531	1439	391	189	0.990094	0.0841135	0.762269	1.27061	chr5	3276582	3276582	5p15.33	AC091832.1 - LINC01019	Epilepsy (remission after treatment)
AHRR	chr5	chr5:356448-359421	GCAGTCAGCGACTGAGGAAGAGCGCCCGCGAGTGGAGGCCCTCAGTCACGGAGTCCACCCGG	62	2973	47.9516	0	0	0	0	2292.5	2415	2902	2904	2352	2725	1048	1083	2911	115	25	1.03306	0.0817194	0.767785	1.30747	chr5	361033	361033	5p15.33	AHRR	Systolic blood pressure
SLC9A3	chr5	chr5:495378-495972	CTCCCCGCGCCATCGCCGACCCTCCCCACGCTCCA	35	594	16.9714	0	0	0	0	663.857	592	571	685	967	NA	606	532	694	389	43	1.02337	0.0737288	0.76477	1.31138	chr5	518319	518319	5p15.33	SLC9A3	Lung disease severity in cystic fibrosis
LOC105374606	chr5	chr5:557421-558176	GACCACCACACAGCCTG	17	755	44.4118	2197	0	0	0	730.143	755	NA	755	755	580	686	546	1034	33	37	1.00794	0.0720011	0.766422	1.30791	chr5	583327	583327	5p15.33	MIR4456 - AC106772.1	Ulcerative colitis
LOC105374607	chr5	chr5:561732-565844	ACACAGGCCCCCGCAGAGGGGTTCAGCTCAGGGGACGGCGCCG	43	4112	95.6279	5143	0	0	0	3592	2946	NA	2910	3676	4770	2128	3801	4913	34	17	1.04532	0.108422	0.666158	1.43816	chr5	583327	583327	5p15.33	MIR4456 - AC106772.1	Ulcerative colitis
PDE4D	chr5	chr5:59434008-59434326	TCTTTAGGATGTTCCTAAAGAAGTCTCA	28	318	11.3571	0	0	0	0	430	289	290	302	340	655	615	659	290	25	159	0.98155	0.0678439	0.741828	1.23018	chr5	59417854	59417854	5q11.2	PDE4D	Adverse response to chemotherapy (neutropenia/leucopenia) (gemcitabine)
FLJ33360	chr5	chr5:6100448-6101908	CACCCCATGGACCTTCC	17	1460	85.8824	208587	0	0	0	1509.12	1638	1460	1448	1642	1470	1477	1483	1455	213	96	0.983038	0.0650779	0.754685	1.17714	chr5	5897581	5897581	5p15.32	ICE1 - AC010266.2	QT interval
CEP72	chr5	chr5:629379-633548	TTTGGACCAGTCCTGGTGGGGTTCTGTCCAGTGCCGGGA	39	4169	106.897	0	0	0	0	3725.86	3347	2991	3311	4339	NA	3397	5615	3081	81	31	1.00168	0.102095	0.661287	1.38515	chr5	618471	618471	5p15.33	CEP72	Obesity-related traits
CEP72	chr5	chr5:641738-642404	TCCCCCGTCTAGAAGCCTCTGCATTTAAACACACGTGG	38	666	17.5263	0	0	0	0	578.125	707	556	666	514	514	640	514	514	13	20					chr5	662977	662977	5p15.33	CEP72, TPPP	Barrett's esophagus or Esophageal adenocarcinoma
LOC107984116	chr5	chr5:68964729-68966166	TCACACACACATCCTC	16	1437	89.8125	0	0	0	0	1524.25	1464	1464	1464	1464	1454	1729	1691	1464	255	235	0.995523	0.0625128	0.788494	1.18759	chr5	68921008	68921008	5q13.1	AC093523.1	Maximum cranial length
ZDHHC11B	chr5	chr5:710542-711897	TTTCCCAGTACTGTGCTCCCA	21	1355	64.5238	0	178201	0	177	1425.6	NA	1482	NA	1355	1328	1481	1482	NA	376	470	0.96938	0.182775	0.249611	1.55439	chr5	668194	668194	5p15.33	TPPP	Esophageal adenocarcinoma
LOC101929232	chr5	chr5:7300020-7301401	CTCCCGCATCTTCTCCTCCTG	21	1381	65.7619	0	543	0	543	1201.88	1044	1044	1065	1316	1269	1259	1279	1339	26	27	1.00365	0.0638529	0.807233	1.21255	chr5	7301261	7301261	5p15.31	AC091951.1	Subjective well-being
TRIP13	chr5	chr5:897113-900013	GATGGGCTCTGGCAGGCCAAGCCCAGGGCTTCATTCAGTCAGTGTGTGGGGAAACAGGTGGATTTG	66	2900	43.9394	0	0	0	0	2096	3159	2434	2438	2438	1121	1893	1015	2270	91	178	0.998768	0.0674128	0.741398	1.29442	chr5	851467	851467	5p15.33	BRD9	Lung cancer in ever smokers
LOC285692	chr5	chr5:9914607-9915222	AGGCTCACATGGAGAGATGCATG	23	615	26.7391	11121	0	0	0	606.625	611	592	615	592	612	603	613	615	29	27	0.993775	0.083974	0.611351	1.46444	chr5	9902717	9902717	5p15.2	LINC02112	Bacteremia
LOC105377913	chr6	chr6:102463782-102464445	AAAGGTTAGTACGCTAACCTTGGT	24	663	27.625	238316	0	0	0	673.125	629	845	841	692	564	476	651	687	350	169	1.00345	0.114253	0.586115	1.74438	chr6	102438768	102438768	6q16.3	AP002530.1 - AL357139.1	Longevity (90 years and older)
SCML4	chr6	chr6:107782623-107783776	AGTTTGCCTGATGGCAGGTGCTGGTCTG	28	1153	41.1786	0	0	0	0	929.143	1040	957	957	705	NA	959	929	957	506	245	0.997964	0.0509143	0.852784	1.16753	chr6	107777645	107777645	6q21	SCML4	Educational attainment (MTAG),Highest math class taken (MTAG)
SLC35F1	chr6	chr6:117924024-117924427	TATACACACATAGGTACACATGCATATGTA	30	403	13.4333	0	0	0	0	682	839	647	859	413	NA	591	602	823	43	210	0.991575	0.067085	0.812843	1.2131	chr6	117782973	117782973	6q22.1	NUS1 - SLC35F1	Classic bladder exstrophy
FOXQ1	chr6	chr6:1316930-1317297	GCCGGGCACGGTGGCGCACGCCTGTAATCCCAGCACTTTGGGAGGCCAAGGCGGGTGGATCACCTGAGTTAGGAAGTTCAAGACTAGCCTGACCAACATGGAGAAACCCCGTCACTACTAAAAATACAAAATTA	134	367	2.73881	2123	0	0	0	765.714	647	880	880	821	NA	688	700	744	0	0	1.01359	0.0642889	0.783434	1.26097	chr6	1318643	1318643	6p25.3	FOXQ1 - LINC01394	Breast cancer
LOC105378027	chr6	chr6:140680923-140683280	TATAGAGATATATGTTCTCTACATATCTCTATAGA	35	2357	67.3429	0	0	0	0	2353.88	1826	1806	2774	2773	2195	2330	2384	2743	287	205	0.993833	0.11737	0.556458	1.46536	chr6	140700714	140700714	6q24.1	MIR4465 - RPS3AP24	Night sleep phenotypes
UST	chr6	chr6:148738138-148738991	ATATATATATATTTATATATATATATTTTATAT	33	853	25.8485	6869	0	0	0	4136	4042	NA	4950	3977	3871	3919	3911	4282	193	5	0.965283	0.065282	0.770695	1.20261	chr6	148738155	148738155	6q25.1	RPSAP40 - UST	Glaucoma
LOC101928868	chr6	chr6:154524799-154525433	ACATATAGATATATGTGTGTATATAC	26	634	24.3846	3009	0	0	0	1252.5	1234	1251	1316	1230	1228	1230	1230	1301	26	58	1.0087	0.0757835	0.784602	1.24312	chr6	154575101	154575101	6q25.2	AL357075.1 - RPS4XP8	Lipoprotein (a) levels
SLC22A1	chr6	chr6:160125361-160127168	GGTGCTAAGATCATGAGGTCCACTCGGGGGGGATGTGGGCATTTTCCTGGCTTTTGACTCTCCCAACAAGAGGATCTCCTCT	82	1807	22.0366	0	0	0	0	1843.88	1884	1883	1883	1887	1719	1885	1721	1889	12	28	0.991432	0.0653342	0.752386	1.19654	chr6	160122116	160122116	6q25.3	SLC22A1	Cholesterol, total
RPS6KA2	chr6	chr6:166858895-166859078	GGGAGAGCTCCACGGAAGAACACCAGCCAGCCATCAGCACCGGCTGCCATGCAGCAGACAC	61	183	3	0	0	0	0	137.25	183	122	122	122	122	183	122	122	14	14	0.989946	0.0558901	0.835067	1.16833	chr6	166850613	166850613	6q27	RPS6KA2	Blood pressure (smoking interaction)
TCP10	chr6	chr6:167385160-167389329	TGTGTGTCCTGAGGTGTGTGAGGTTGTGTGTGTGTCCTGAGGTGTGTGAGGGTTGTG	57	4169	73.1404	525	0	0	0	3276.25	3534	2981	2985	2985	3580	3191	3594	3360	2405	1972	0.994066	0.101497	0.599547	1.31735	chr6	167361439	167361439	6q27	TCP10	Uterine fibroid size (maximum dimension)
LOC105378126	chr6	chr6:167432936-167434925	GGTGGTAGAGTGTGGATGGTGGTGGT	26	1989	76.5	0	0	0	0	3337	3524	3524	3422	3521	3143	3134	3204	3224	231	82	1.00937	0.0725238	0.639011	1.30136	chr6	167361439	167361439	6q27	TCP10	Uterine fibroid size (maximum dimension)
LINC01615	chr6	chr6:169125911-169129548	TGCAGGCTAAGTGAGGCACCTCAATCTCAAGGCTCA	36	3637	101.028	29130	0	0	0	3051	2881	2881	2881	2881	2881	3557	2881	3565	291	191	1.00559	0.134194	0.457242	1.60606	chr6	169157918	169157918	6q27	AL109924.3 - LINC01615	Diisocyanate-induced asthma
ERMARD	chr6	chr6:169781629-169782955	TCTGCAGTCTTCTGATGTACCCTTTCCGAGTGGTCGGTGTGAGTCTCAG	49	1326	27.0612	889	0	0	0	1275.25	1321	1371	1326	1326	1130	1370	1228	1130	77	103	0.991611	0.0589545	0.825312	1.15942	chr6	169713148	169713148	6q27	PHF10	Thiazide-induced adverse metabolic effects in hypertensive patients
LOC105378149	chr6	chr6:169891284-169893260	GGGTCTCCATCACTGTGAGCCTCGTGGAGA	30	1976	65.8667	0	0	0	0	2316.25	2570	2084	1976	1976	1976	2899	2899	2150			1.00433	0.0674829	0.769302	1.30634	chr6	170017397	170017397	6q27	AL049612.1 - AL596442.1	Breast cancer
LOC105378149	chr6	chr6:169900125-169902317	TGATGATGGGGTGACAG	17	2192	128.941	0	0	0	0	3177.71	3505	NA	2222	2222	2224	3793	3610	4668	0	0	1.01085	0.0793601	0.764216	1.29658	chr6	170017397	170017397	6q27	AL049612.1 - AL596442.1	Breast cancer
LOC105378150	chr6	chr6:170064716-170066619	CCATCCCTCCATCCACC	17	1903	111.941	29247	0	0	0	2408.29	2491	NA	1826	1813	2375	3173	2985	2195			0.977902	0.0839734	0.72861	1.29662	chr6	170063801	170063801	6q27	AL049612.1 - AL596442.1	Type 1 diabetes
FAM120B	chr6	chr6:170376907-170377924	GTGCTGTGCACACGCGTCCCTAAACCCAGACGCCTGGGAGAACACAGGCTCACGCTGCTCG	61	1017	16.6721	0	0	0	0	1588	3281	3328	1011	1017	1016	1017	1017	1017	146	41	0.99769	0.078347	0.783899	1.25253	chr6	170392743	170392743	6q27	FAM120B, FAM120B	Idiopathic dilated cardiomyopathy
FAM120B	chr6	chr6:170394418-170394728	TGCCAGCACAAGGCCACGCCTCCGTGGACACCGCAGCA	38	310	8.15789	0	0	0	0	452	423	420	538	425	462	462	424	462	77	48	0.998457	0.0606955	0.815875	1.22403	chr6	170392743	170392743	6q27	FAM120B, FAM120B	Idiopathic dilated cardiomyopathy
GMDS	chr6	chr6:1905258-1905874	AGGTGGGACCTCAAAGGTGCCTGTGCATCTGCATGTGGGGCCAGCACATAGCTGTGGGTGCTGGCGTGT	69	616	8.92754	0	0	0	0	577.625	614	616	616	615	377	615	377	791	2	8	0.99521	0.055145	0.814904	1.15489	chr6	1903356	1903356	6p25.3	GMDS	Daytime sleep phenotypes
GMDS	chr6	chr6:2200291-2202378	CATGTTAGCAGAGAGGTGAAGGATGAAGAGAGAGCACCACATGGACATCCGAGATGAAACCATCTAGGCAGTGAGGGCAG	80	2087	26.0875	0	0	0	0	2179.25	2087	2087	2085	2087	2830	2086	2085	2087	792	4	0.984776	0.0657241	0.815215	1.34509	chr6	2235399	2235399	6p25.3	GMDS	Caudate nucleus volume
DUSP22	chr6	chr6:325050-326619	CCTGCTGGTGCCTGGAGAGTCATCTGCCCTGGGCTTCCGCATCCTCGTGTGTGCAGTGCTGTACCTGCTGGTGCCTGAGAGTCATCTGCCCTGGGCTTCTGCGTCCTGGTGTGTGCAGTGCTGTATCTGCTGGTGCCTGGAGAGTCATCTGCCCTGGGCTTCCGCGTCCTGGTGTGTGCAATGCTGTATCTGCTGGTGCCTGGAGAGTCATCTGCCCTGGGCTTCCGCGTCCTGGTGTGTGCAGTGCTGTATCTGCTGGTGCCTGGAGAGTCATCTGCCCTGGGCTTCTGCGTCCTGGTGTGTGCAGTGCTGTATCTGCTGGTGCCTGGAGTCATCTGCCCTGGGCTTCTGCGTCCTGGTGTGTGCAGTGCTGTACCTGCTGGTGCCTGGAGAGTCATC…	63	1569	24.9048	0	0	0	0	1599.75	1568	1631	1569	1631	1630	1631	1631	1507	9	9	0.979512	0.12123	0.630569	1.41869	chr6	327331	327331	6p25.3	DUSP22	Male-pattern baldness
IRF4	chr6	chr6:371050-372456	AGCAGCAGTTGCAGTAGCTGTGGCAGGAGGAGTAGCAGC	39	1406	36.0513	19243	0	0	0	4531.25	2921	4563	4803	3096	3096	6513	6580	4678	320	203	0.993448	0.115104	0.607118	1.39232	chr6	376329	376329	6p25.3	DUSP22 - IRF4	Eosinophil counts,Eosinophil percentage of granulocytes,Eosinophil percentage of white cells,Neutrophil percentage of granulocytes,Sum eosinophil basophil counts
UBR2	chr6	chr6:42523790-42524232	ATTATTCCATATTCTATATAGAATAATTCTATAT	34	442	13	39360	0	0	0	688.125	707	440	442	442	503	996	991	984	293	17	0.992491	0.0605904	0.826254	1.18052	chr6	42527540	42527540	6p21.1	AL591473.1 - UBR2	Obesity-related traits
COL21A1	chr6	chr6:56097754-56098730	TATAAATATATAAATATA	18	976	54.2222	0	0	0	0	2113.62	2065	2127	2083	2160	2074	2212	2046	2142	778	0	0.992424	0.0639413	0.798834	1.19879	chr6	56085576	56085576	6p12.1	COL21A1	Psychosis (atypical)
C7orf50	chr7	chr7:1016047-1017023	CAGCACACAG	10	976	97.6	0	0	0	0	1066	NA	976	NA	693	1257	1257	1237	976	304	117	1.03269	0.0746619	0.812977	1.2815	chr7	1018557	1018557	7p22.3	C7orf50	C-reactive protein levels or total cholesterol levels (pleiotropy)
LOC107986766	chr7	chr7:10589282-10590240	AAAAAAAAATCCTTCAATTTGAGATCTCCCTTTCTACTTAGGTTAGGGAAAGT	53	958	18.0755	50035	0	0	0	972.25	958	955	959	958	1119	956	956	917	108	113	0.979429	0.0707203	0.805434	1.24447	chr7	10580010	10580010	7p21.3	AC004949.1	Venous thromboembolism adjusted for sickle cell variant rs77121243-T
LOC105375156	chr7	chr7:12485037-12485906	GAATTTTTGAAACTAAGCTTTTCTCTACACCATCATTCACTAATTGCCTGAAATCCAAATTATAATTTGCACGTCATAGGGCCTCTAAAGTTGAATTTCAGTAGACATTATGCTATCAGCTGGGTTGGAAGGAGTTGAGAATGGG	145	869	5.9931	0	0	0	0	1193	1012	1013	1014	1159	1593	1158	1581	1014	66	93	0.982778	0.0668807	0.791992	1.24452	chr7	12535647	12535647	7p21.3	AC013470.2	Facial morphology (factor 9, facial height related to vertical position of nasion)
LOC102725191	chr7	chr7:12526670-12528566	CATCTAGCTGTGTAATTGAAATGGAACATGTCAGCTTTCCTAGTATATGCTATGTGTCACTCACTTTGGTAGAAAATGC	79	1896	24	0	0	0	0	2302.12	3311	1893	1896	2133	2448	2448	2449	1839	44	47	0.977998	0.0695135	0.770328	1.174	chr7	12535647	12535647	7p21.3	AC013470.2	Facial morphology (factor 9, facial height related to vertical position of nasion)
UNCX	chr7	chr7:1272060-1273140	CCACCTCCCACAGACACTGC	20	1080	54	34982	0	0	0	3072.4	NA	NA	2465	4791	1118	NA	3187	3801	3140	439	1.01418	0.0985095	0.723852	1.37945	chr7	1277531	1277531	7p22.3	AC073094.1 - MICALL2	Age at loss of ambulation in Duchenne muscular dystrophy
LOC105375114	chr7	chr7:129062-129393	CAGAGCCCTGGACGACCACCCTTGCTCCTGTCTCAGGACA	40	331	8.275	7540	0	0	0	742.75	691	690	534	534	684	1071	847	891	125	230	1.01554	0.107507	0.716677	1.57958	chr7	82377	82377	7p22.3	AC093627.1	Alzheimer's disease in APOE e4- carriers
LOC105375493	chr7	chr7:128107523-128108239	CCCCTGCCAGCGCCTCTCCATACTGCTCCCTCGT	34	716	21.0588	13886	0	0	0	769.5	725	668	794	760	760	727	726	996	391	206	1.00844	0.103609	0.671437	1.44494	chr7	128097177	128097177	7q32.1	SND1 - MIR129-1	Educational attainment (MTAG)
CHRM2	chr7	chr7:136867637-136868071	ATATATATATATTCTGG	17	434	25.5294	640	0	0	0	549.875	533	530	597	551	568	522	556	542	91	11	0.987731	0.061822	0.826375	1.18016	chr7	136891353	136891353	7q33	CHRM2, AC009264.1	Resting heart rate
SHH	chr7	chr7:155792018-155792517	CCCTCTCTCCGTAATCCC	18	499	27.7222	7379	0	0	0	2374.5	2214	2211	2381	2603	2337	2307	2334	2609	348	114	0.987576	0.0633159	0.801357	1.18218	chr7	155767426	155767426	7q36.3	RBM33	Educational attainment (years of education)
LOC105375600	chr7	chr7:156264910-156267306	TATGCTGAGTCTGTCTACCTGGTGGAGACTGTCCTGTTTCTCCTC	45	2396	53.2444	29873	0	0	0	2508.25	2486	2486	2486	2754	2396	2486	2486	2486	60	94	0.995117	0.0646651	0.782464	1.22176	chr7	156255955	156255955	7q36.3	RF00019 - AC093813.1	Bipolar disorder and schizophrenia
PTPRN2	chr7	chr7:157646828-157650024	GGTCGGACCCATCCAGTGTGCACTGAACTCGGTGGGTCGGACCCATCCACTGTGCACTGAACTCGGTG	68	3196	47	0	0	0	0	2561.12	3192	2312	4080	2312	2516	2004	2067	2006	538	351	1.01812	0.104894	0.701969	1.35525	chr7	157649305	157649305	7q36.3	PTPRN2	Scarlet fever
PTPRN2	chr7	chr7:158070248-158072129	GAGGTGCTCGTGGTGGTG	18	1881	104.5	0	0	0	0	1872.88	1584	2182	2604	1724	1504	1857	1558	1970	486	231	0.996821	0.0695574	0.765446	1.24725	chr7	158159143	158159143	7q36.3	PTPRN2	Coronary artery calcified atherosclerotic plaque (130 HU threshold) in type 2 diabetes
PTPRN2	chr7	chr7:158360013-158361196	CCTCACCCAGGACGACGCACAGACCCCACATCCAC	35	1183	33.8	0	0	0	0	3059.29	4228	2679	2716	3767	1827	NA	2529	3669	387	425	0.992124	0.0831954	0.73476	1.26826	chr7	158359285	158359285	7q36.3	PTPRN2	Adolescent idiopathic scoliosis
PTPRN2	chr7	chr7:158395285-158395820	GAGGGGC	7	535	76.4286	0	0	0	0	1399.25	1854	1348	1343	1350	1337	1346	1289	1327	307	33	1.05483	0.113701	0.692807	1.52245	chr7	158395634	158395634	7q36.3	PTPRN2	Carotid plaque burden
PTPRN2	chr7	chr7:158425144-158428040	GCACCGCCGGGAAAGACGCGGGGTCCGAGTCCAGCCTAGCTGAGGCCTGC	50	2896	57.92	0	0	0	0	1716.75	1842	1735	1743	1743	1595	1742	1591	1743	136	15	1.01639	0.0767222	0.749979	1.29778	chr7	158430414	158430414	7q36.3	PTPRN2	Obesity-related traits
NCAPG2	chr7	chr7:158648510-158648991	AATGGACCACAACCACGCCA	20	481	24.05	0	0	0	0	688	1013	610	979	1001	458	481	481	481	1	37	0.996808	0.0639943	0.755578	1.2096	chr7	158708801	158708801	7q36.3	NCAPG2 - AC019084.1	Testicular germ cell tumor
WDR60	chr7	chr7:158915036-158917315	TTGTGAAACGTCGACACGCTGGTTGACATTAAGGATGA	38	2279	59.9737	0	0	0	0	5627.29	10067	5563	6524	3108	5497	NA	5562	3070	1178	234	1.00068	0.161844	0.56604	1.53692	chr7	158932098	158932098	7q36.3	WDR60	Height
WDR60	chr7	chr7:158950388-158950964	GGACCAGCCTCTATACGATTCCAGGTGTTCTATATGATTCCAGGTGTGATATACTGCACGG	61	576	9.44262	0	0	0	0	626.625	582	581	574	826	582	521	521	826	41	20	1.0017	0.0606342	0.836787	1.19282	chr7	158952451	158952451	7q36.3	WDR60	Hippocampal volume
LINC00689	chr7	chr7:158997927-158998945	CCCCCTCCACACTCCCCACCTTCATCCACGCTCCCCTCTCCTCAGTGGGAC	51	1018	19.9608	9372	0	0	0	2250.14	1643	2407	NA	1436	2253	3289	2714	2009	470	202	1.02277	0.0751898	0.794922	1.35655	chr7	158985243	158985243	7q36.3	WDR60 - LINC00689	Facial morphology (factor 20)
LINC00689	chr7	chr7:159018045-159018947	CCCCATTGTGTCTCAGTCTCACC	23	902	39.2174	0	0	0	0	1439.14	1440	1457	NA	1435	1411	1389	1412	1530	327	137	1.00058	0.0620151	0.817094	1.18127	chr7	158985243	158985243	7q36.3	WDR60 - LINC00689	Facial morphology (factor 20)
VIPR2	chr7	chr7:159202653-159203788	TGAGGAGACGGCCTGGGACCAGGATGCCCTATCCA	35	1135	32.4286	57610	0	0	0	3121.62	5572	2552	5754	2223	2289	2291	2138	2154	347	589	1.00585	0.132631	0.685975	1.58373	chr7	159135736	159135736	7q36.3	VIPR2	Spherical equivalent
IQCE	chr7	chr7:2577238-2578200	GTGTGCGTGGCTGTGCGCGCGGGGACGTGTGTGCGGCGTGCGCGCATTGGC	51	962	18.8627	0	0	0	0	937	961	961	911	911	966	911	912	963	9	18	1.03427	0.0654612	0.820323	1.26021	chr7	2574148	2574148	7p22.3	IQCE	Adolescent idiopathic scoliosis
LOC105375228	chr7	chr7:35044326-35046250	TGCCCCTCACCATTCCCCAG	20	1924	96.2	0	0	0	0	1702.5	2500	775	1182	1181	1918	2013	1797	2254	1457	442	0.979842	0.104541	0.475846	1.40839	chr7	34983359	34983359	7p14.2	DPY19L1	Post bronchodilator FEV1
SDK1	chr7	chr7:3975898-3977440	GCTGCCACGCAGAGGGTCCTCCAGAGAATCACTGAGGGTCCCGGGGCTGAG	51	1542	30.2353	0	0	0	0	3551.88	4405	4330	3469	1875	3830	2465	3006	5035	177	122	1.00248	0.10702	0.56359	1.31679	chr7	3875932	3875932	7p22.2	SDK1	Quantitative traits
LOC100131372	chr7	chr7:410930-411948	CCCCAGGACCCGCACACCCGGGGCAGCCTCTCCAGC	36	1018	28.2778	15059	0	0	0	852.125	1014	762	766	1014	959	766	770	766	30	19	1.01433	0.0712316	0.74634	1.22559	chr7	471254	471254	7p22.3	AC226118.1 - AC147651.3	Male-pattern baldness
OCM	chr7	chr7:5860351-5860800	TGTATATATATA	12	449	37.4167	0	0	0	0	466.125	427	725	449	449	363	504	363	449	21	89	1.00604	0.0701998	0.806485	1.34414	chr7	5840746	5840746	7p22.1	ZNF815P	IgG glycosylation
PRKAR1B	chr7	chr7:635932-636459	CCGCGCCCTCACGTCCTCCACCGG	24	527	21.9583	0	0	0	0	984.875	1397	1141	991	879	955	985	931	600	17	36	1.02739	0.0698388	0.823928	1.30584	chr7	631957	631957	7p22.3	PRKAR1B	Hematocrit,Hemoglobin concentration
LOC105375341	chr7	chr7:68395247-68395990	ATATACACATATATGTATATATACACACATATACACATATATGTATATATACACACACATATACATATAATGTATATATACACACAC	87	743	8.54023	64813	0	0	0	734.375	681	681	748	683	749	833	751	749	24	37	1.00226	0.0613432	0.837142	1.20193	chr7	68450298	68450298	7q11.22	AC093655.1 - AC004910.1	Insomnia
ABCB1	chr7	chr7:87626092-87626773	ATATATATGTGTC	13	681	52.3846	0	0	0	0	758.5	1030	378	698	646	784	883	876	773	333	258	1.02545	0.107495	0.710041	1.54836	chr7	87633265	87633265	7q21.12	ABCB1, RUNDC3B	Bone mineral density (spine) and age at menarche
ANGPT1	chr8	chr8:107542881-107543159	ATGTATATATACATATATACGTAT	24	278	11.5833	44759	0	0	0	1176.62	1222	1222	1433	1511	643	1484	623	1275	22	25	0.979654	0.0645938	0.797566	1.17378	chr8	107626417	107626417	8q23.1	ANGPT1 - PGAM1P13	Macrophage inflammatory protein 1b levels
LOC286083/DLGAP2	chr8	chr8:1287149-1288797	GTGGTTCTGTTAGGAGGGGAACTAGTTTTGGTTCAGTGTGTGTGTGTGTGTGTGTGTTGTGGTTCTGTTAGGAGGGGAACTAGTTTTGGTTCAGCGTGTGTGTGTGTGT	109	1648	15.1193	8144	0	0	0	1445	1036	1618	1408	1029	1618	1613	1620	1618	0	0	0.993116	0.0629879	0.767313	1.18667	chr8	1295964	1295964	8p23.3	DLGAP2	Menarche (age at onset)
WISP1	chr8	chr8:133213800-133214135	ATATACTATATATACACTATATATAGTAGTTAT	33	335	10.1515	0	0	0	0	1035	NA	1037	1025	1051	1014	1023	1015	1080	37	16	0.98736	0.0627639	0.770337	1.1821	chr8	133199283	133199283	8q24.22	WISP1	Endometriosis
ZFAT	chr8	chr8:134497390-134499688	GGATGCCCCCGTTGCTGGTTACACACAGAGCCTGATTTGGTAGGGTTGGGGTGGAGCTG	59	2298	38.9492	0	0	0	0	2114.86	NA	2267	2122	2414	2285	2176	1359	2181	2	9	0.995212	0.0656831	0.803722	1.18428	chr8	134507604	134507604	8q24.22	ZFAT	Iron status biomarkers (iron levels)
LOC105379585	chr8	chr8:1384291-1385913	GGCCTGTGCCCGTCCCCTGAGAACTTGGTGCACAGTTACCCC	42	1622	38.619	11850	0	0	0	2296.12	2122	1870	2130	2126	2570	2561	2404	2586	203	65	1.03602	0.0904284	0.777888	1.29161	chr8	1351712	1351712	8p23.3	DLGAP2	3-hydroxypropylmercapturic acid levels in smokers
TRAPPC9	chr8	chr8:139755253-139757560	AGCCAGGGTTTGGGGATGAGGACAGCAGGTCGCAGGAGG	39	2307	59.1538	0	0	0	0	2525.17	NA	NA	2308	3120	2304	2610	2513	2296	157	207	0.998314	0.0676298	0.798419	1.20729	chr8	139784177	139784177	8q24.3	TRAPPC9	Pediatric non-alcoholic fatty liver disease activity score
TRAPPC9	chr8	chr8:140338696-140339138	AGACGGCCACCTACAGGCCGACGGGAAACGGCTCAGAGAAAACCACCGCCACC	53	442	8.33962	0	0	0	0	441.875	441	442	442	442	442	442	442	442	80	31	0.995249	0.0563343	0.834749	1.26388	chr8	140394230	140394230	8q24.3	TRAPPC9	Blood pressure (smoking interaction)
AGO2	chr8	chr8:140622254-140623334	TAATGCACATGGGGTCTCCTCTTGGGGGAA	30	1080	36	0	0	0	0	839.125	1012	1190	629	655	848	825	807	747	279	39	1.00084	0.0579555	0.829818	1.2243	chr8	140625230	140625230	8q24.3	AGO2	Experiencing mood swings
LINC01300	chr8	chr8:141335088-141335919	GGCCAGGGCTCAACGTGTATCAGGAGTGACCAGGGCCAGGGCTCAGATTGTGTTGA	56	831	14.8393	4578	0	0	0	801.875	830	826	719	1286	822	720	738	474	158	101	1.00453	0.0685569	0.790448	1.26721	chr8	141327691	141327691	8q24.3	AC011676.4 - LINC01300	Granulocyte count,Myeloid white cell count,Neutrophil count,Sum basophil neutrophil counts,Sum neutrophil eosinophil counts
LOC105375791	chr8	chr8:141550381-141551575	GGGGCCGGGGCGCTTCCGCCTGGTGGGCTGGGGTCTGTCTG	41	1194	29.122	36107	0	0	0	1989.71	1399	NA	1273	2859	1274	3336	1275	2512	12	13	1.01564	0.103949	0.596963	1.35189	chr8	141546705	141546705	8q24.3	AC138647.1 - MIR1302-7	Obesity-related traits
TSNARE1	chr8	chr8:142282360-142284196	TCTGTCAATGAGCAGAGGCGGGGCCAGTG	29	1836	63.3103	0	0	0	0	2027.5	2137	2138	1835	2121	2146	1715	2151	1977	170	78	1.01255	0.0748104	0.765162	1.29972	chr8	142286496	142286496	8q24.3	TSNARE1	Educational attainment (years of education)
TSNARE1	chr8	chr8:142325791-142326706	GGATGAGGAACCAGCACCAGCGAAGGGGAGGGCCCCGGAGAGCACGAGAC	50	915	18.3	0	0	0	0	913.143	NA	913	914	912	913	911	914	915	14	24	1.00082	0.0595527	0.833634	1.19711	chr8	142322332	142322332	8q24.3	TSNARE1	Schizophrenia
ADGRB1	chr8	chr8:142501455-142502250	GATGGAGGTGGGATGGTGGTGGTGATGATGGGGTGGTGGTAGTGATGTTTGTGTGGTTTTGACGATGGAGGTGGGGTGGTGGTGGTGATGGTGATGTGGTGGTGGTGGTGATGGTGGTGGCGGTGATGGCGATGGCGGGGTGGTGGTAGTGATGACTGTGTGGTTTTGACGATGGAGGTAGGGTGGTGGTGGTGATGATGGGATGGTGATAGTGATGGTTGTGTGGTTTTGACGACAGAGGTGGGGTGATGGTGGTGAGGGTGAGGGTGATGTGGTGGTGGTGATAATGGTGGCGGTGATGGCAATGACGGGGTGGAGGTAGGATGGCGGGTGATTTGGAT	341	795	2.33138	0	0	0	0	1936.43	1950	NA	1968	1964	1968	1899	1905	1901	131	26	1.01386	0.0652507	0.816156	1.19014	chr8	142479537	142479537	8q24.3	ADGRB1	General cognitive ability
ADGRB1	chr8	chr8:142563031-142564297	AGAAGCCCACGACATGCAGG	20	1266	63.3	18938	0	0	0	1244.25	1266	1272	1066	1266	1266	1286	1266	1266	125	37	1.00127	0.0598787	0.827157	1.21669	chr8	142599411	142599411	8q24.3	MROH4P - ARC	Educational attainment (MTAG),Educational attainment (years of education)
ZC3H3	chr8	chr8:143486631-143488565	GAAGCTCACACACAGAACAGCACCCGCTACACGGCCCCATCACCAC	46	1934	42.0435	0	0	0	0	1767.12	1749	1702	1709	1426	1704	2169	1969	1709	14	24	1.02561	0.133728	0.646094	1.5907	chr8	143571358	143571358	8q24.3	MROH6, MROH6	Sulfasalazine-induced agranulocytosis
ZC3H3	chr8	chr8:143492681-143493250	CCTGGCCCAGGGGCTCCCTCCTCAGGCTCCCGTGT	35	569	16.2571	0	0	0	0	571.125	499	567	568	566	567	636	597	569	94	41	1.02238	0.0678493	0.837921	1.24262	chr8	143571358	143571358	8q24.3	MROH6, MROH6	Sulfasalazine-induced agranulocytosis
ARHGAP39	chr8	chr8:144531162-144532099	AGCAGGCACGGCAGAAGGGCACAGGGCAGGGAGCAGCAGGTGGGGAGTGGGCTAGACAT	59	937	15.8814	0	0	0	0	1011.88	986	1086	635	1276	1395	812	812	1093	57	32	1.02865	0.0803575	0.767274	1.36776	chr8	144519045	144519045	8q24.3	LRRC14	Cognitive ability (MTAG),Cognitive performance,Educational attainment,Intelligence,Intelligence (MTAG)
ARHGAP39	chr8	chr8:144556521-144557800	CCTTCATAGTATTCAGAGGCAAAGGCTGAA	30	1279	42.6333	0	0	0	0	1881	1881	1871	1882	1882	1883	1883	1883	1883	313	261	1.00815	0.0582574	0.849011	1.25655	chr8	144552744	144552744	8q24.3	ARHGAP39	Smoking initiation
LOC107986881	chr8	chr8:20504778-20505515	ATATATA	7	737	105.286	39214	0	0	0	839.286	736	729	742	NA	970	963	991	744	361	18	0.939128	0.0638856	0.619521	1.2684	chr8	20499686	20499686	8p21.3	AC023403.1 - AC022559.1	Interleukin-9 levels
LOC105379315	chr8	chr8:20864814-20865339	TATAAATATATA	12	525	43.75	0	0	0	0	1204.43	1218	1245	1363	NA	1439	925	982	1259	1064	8	0.981582	0.0587636	0.828327	1.17747	chr8	20789812	20789812	8p21.3	AC018541.1 - TMEM97P2	Cerebrospinal AB1-42 levels in mild cognitive impairment,Cerebrospinal fluid AB1-42 levels
DOCK5	chr8	chr8:25215975-25217103	GTATACAATATGTATATACT	20	1128	56.4	0	0	0	0	957.625	1047	1029	1047	1027	1143	670	702	996	716	492	0.996337	0.0656589	0.645215	1.23018	chr8	25200975	25200975	8p21.2	DOCK5	Coronary artery disease
RBPMS	chr8	chr8:30388399-30388653	CTTATAACTTATAGCTATAGCTATAAGCTAA	31	254	8.19355	0	0	0	0	940.625	1132	976	719	687	999	1012	907	1093	113	186	0.990868	0.0649765	0.822132	1.23278	chr8	30384102	30384102	8p12	RBPMS-AS1	Breast size
CSMD1	chr8	chr8:3411661-3412166	TATATATACACG	12	505	42.0833	0	0	0	0	529.125	472	627	472	483	510	545	495	629	65	106	0.995312	0.0717994	0.786906	1.19218	chr8	3448320	3448320	8p23.2	CSMD1	Chronic bronchitis and chronic obstructive pulmonary disease
LOC105377793	chr8	chr8:5383851-5384554	TGCAGTGGCACAATCACGGCTCACCGTAGCCCTCACC	37	703	19	149435	0	0	0	605.625	700	926	518	518	555	555	555	518	31	18	1.00388	0.0611199	0.841444	1.20969	chr8	5369580	5369580	8p23.2	AC007718.1 - AC091193.1	Metabolite levels (5-HIAA)
RP1	chr8	chr8:54593989-54594335	GGAAACACATCATTCCTGAACTCTGAGAGAACTTGGGACCAGGAACTTGGTTCTTCTTGGTCTGAGGCT	69	346	5.01449	0	0	0	0	475	483	414	484	483	484	484	484	484	59	66	0.982289	0.0598757	0.8229	1.14808	chr8	54583273	54583273	8q11.23	RP1	Lung cancer,Lung cancer in ever smokers
LINC01592	chr8	chr8:68906091-68907078	GATATCTATCTATATCTAAAGATAGATA	28	987	35.25	5018	0	0	0	2460.25	2795	2740	2892	2748	2158	1622	1896	2831	842	357	0.993529	0.0959719	0.716091	1.29645	chr8	68961217	68961217	8q13.2	LINC01592	Pharmacokinetics of antiepileptic drugs in severe mental disorder (concentration drug ratio)
ERICH1	chr8	chr8:699667-700587	ACAGACCCGCACACGCGC	18	920	51.1111	0	0	0	0	924.25	819	867	938	1175	917	938	920	820	217	80	1.03878	0.0720863	0.755792	1.26157	chr8	616207	616207	8p23.3	ERICH1, ERICH1	IgG glycosylation
ERICH1	chr8	chr8:713940-715301	ATGTGCTGCACCCAGGCGGCCTCTTCCCGCATCTCTCGGTGGG	43	1361	31.6512	0	0	0	0	1330	1703	1763	1353	974	1102	1242	1271	1232	72	62	1.01946	0.0680529	0.833916	1.24472	chr8	616207	616207	8p23.3	ERICH1, ERICH1	IgG glycosylation
ERICH1-AS1	chr8	chr8:807216-807666	TTCTCATTCATACGTTCTCTCTCCTCTTTTTC	32	450	14.0625	0	0	0	0	494.25	444	785	447	449	450	479	450	450	254	196	1.0128	0.111072	0.688547	1.59706	chr8	813540	813540	8p23.3	DLGAP2	Educational attainment (MTAG)
ERICH1-AS1	chr8	chr8:848256-849244	TTCCAGTATAGGATCGTGCGGTGCGTG	27	988	36.5926	0	0	0	0	1029.12	1041	959	1130	1015	994	1013	1120	961	26	18					chr8	862946	862946	8p23.3	DLGAP2	Clozapine-induced cytotoxicity
ERICH1-AS1	chr8	chr8:939053-939884	TGCCTGGGAGTGGGAGGTGCAGACACAGGGGCTGGGG	37	831	22.4595	0	0	0	0	812.429	831	831	829	791	NA	827	747	831	158	76	1.0107	0.109565	0.680093	1.53346	chr8	862946	862946	8p23.3	DLGAP2	Clozapine-induced cytotoxicity
DENND1A	chr9	chr9:123404506-123406055	TGAGTTTCCAGGACAAGACAGGGAAGGGAAGCAGGCACACACTCCACTTCCTGCCCACCCTT	62	1549	24.9839	0	0	0	0	1490.88	1669	1720	1673	1673	1174	1175	1170	1673	100	143	1.01305	0.107191	0.695357	1.5744	chr9	123392075	123392075	9q33.3	DENND1A	Myopia (pathological)
ZBTB34	chr9	chr9:126876162-126876227	CCTTCCCC	8	65	8.125	0	0	0	0	581	884	452	710	415	NA	421	507	678	24	14	0.99145	0.0614244	0.787994	1.2473	chr9	126908413	126908413	9q33.3	ZBTB34 - RALGPS1	Self-reported math ability,Self-reported math ability (MTAG)
ABL1	chr9	chr9:130777352-130778400	GGAATCGAGGAACCTCTCAGGGCTTTGTGTTGGGACGCTGACACACTGCATTAGTACTTTCTAGACTGTGAGCAGG	76	1048	13.7895	0	0	0	0	1055.75	1123	1124	972	1123	1124	971	1037	972	12	10	0.995899	0.0626098	0.811876	1.49083	chr9	130780067	130780067	9q34.12	ABL1	Macrophage colony stimulating factor levels
LOC105376297	chr9	chr9:130954928-130955460	CACCATCATCATCATCAC	18	532	29.5556	9476	0	0	0	1388.33	NA	NA	1381	1375	1366	1353	1498	1357	25	66	1.00672	0.0585095	0.838579	1.45295	chr9	130922006	130922006	9q34.12	FIBCD1	Diverticular disease
TTF1	chr9	chr9:132377129-132378729	TGCATGTGGTGTGTGTGAG	19	1600	84.2105	0	0	0	0	1586.62	1643	1587	1569	1588	1529	1580	1611	1586	421	437	1.01471	0.108581	0.678964	1.52403	chr9	132381918	132381918	9q34.13	TTF1	Plantar warts
AK8	chr9	chr9:132821668-132822335	TATATACATATATGTGTATGTATATACAAA	30	667	22.2333	0	0	0	0	623.25	587	671	497	761	629	541	581	719	507	142	1.01606	0.111795	0.689498	1.55861	chr9	132833994	132833994	9q34.13	AK8	Highest math class taken (MTAG),Self-reported math ability (MTAG)
LINC00094	chr9	chr9:134011873-134014631	GATACACCGCGGCCCCGGGACTGC	24	2758	114.917	10829	0	0	0	3167.38	3310	2575	3360	2992	3607	2894	3240	3361	363	77	1.027	0.0979561	0.73099	1.51272	chr9	134019616	134019616	9q34.2	VAV2 - BRD3OS	Central corneal thickness
LOC107987137	chr9	chr9:134207309-134207978	GTCCTCCCCACCT	13	669	51.4615	630	0	0	0	809	854	863	669	NA	869	869	870	669	178	125	1.00288	0.0667063	0.788798	1.35813	chr9	134202513	134202513	9q34.2	BX649601.1 - LINC02247	Heel bone mineral density
LOC100506532	chr9	chr9:134549874-134550376	AGGCTGGGTGGTGG	14	502	35.8571	4573	0	0	0	951.571	NA	1327	789	663	868	1188	1079	747	583	141	0.993055	0.0627265	0.746961	1.3749	chr9	134548682	134548682	9q34.3	AL669970.3 - AL669970.2	Central corneal thickness,Corneal structure
LOC100506532	chr9	chr9:134572800-134574966	GTCAGGGGGCGCCTGTGAGCACCTACTGTGTGTGAGTCCTTGCCTGGGT	49	2166	44.2041	28397	0	0	0	2165.5	NA	2166	2165	2166	2164	NA	2166	2166	21	38	0.998097	0.0753655	0.738954	1.38056	chr9	134552452	134552452	9q34.3	AL669970.3 - AL669970.2	Central corneal thickness
NOTCH1	chr9	chr9:136528376-136528579	GGATGGGCAGGGACAGTGGGGG	22	203	9.22727	0	0	0	0	1013.5	1061	1071	874	877	1040	1049	1065	1071	63	35	1.02075	0.0826117	0.718221	1.39258	chr9	136505189	136505189	9q34.3	NOTCH1	Crohn's disease,Inflammatory bowel disease,Ulcerative colitis
NELFB	chr9	chr9:137273688-137273832	GGGGAGGATATAATAATTTCTGGGGGAGGTTGAATAATAATTTCTGGGGGAGGATGATAAAATTTCTG	68	144	2.11765	103	0	0	0	531.714	NA	529	551	530	528	522	531	531	60	26	1.01545	0.0701689	0.789781	1.33217	chr9	137316808	137316808	9q34.3	EXD3	Loneliness
EXD3	chr9	chr9:137341489-137342434	AGGAAACGGGGCTCAGGCACCAGGAGCCGTCTCCCAGGAGTCAG	44	945	21.4773	0	0	0	0	1007	NA	NA	1021	1021	944	1018	1017	1021	116	39	1.02761	0.113845	0.686827	1.4565	chr9	137349516	137349516	9q34.3	EXD3	General cognitive ability
CACNA1B	chr9	chr9:137921248-137922443	CACCACGACCGCACAGCATCCTGGGAGCAGAGTAAAGCGTTCGGAGAACATGATCAG	57	1195	20.9649	0	0	0	0	1251.75	1251	1251	1252	1252	1252	1252	1252	1252	19	16	1.0064	0.0630702	0.833506	1.44658	chr9	137974654	137974654	9q34.3	CACNA1B	Response to paliperidone in schizophrenia (negative Marder score)
CACNA1B	chr9	chr9:138017890-138019605	GAAGTGGCCAGGTGCAGTTAGGCCACCTGCCCTGATG	37	1715	46.3514	0	0	0	0	873.5	642	1220	1186	788	640	636	642	1234	1465	105	1.00255	0.0853222	0.759202	1.4277	chr9	138043623	138043623	9q34.3	CACNA1B	Asparaginase hypersensitivity in acute lymphoblastic leukemia
UNC13B	chr9	chr9:35372427-35374567	TGGGCTTGGCAGATACATGGGGCCCCTGTGCAAGAGTGTGGCTAGCAAGGCAGCCCCAGCTCTCAGACTTAACTCTC	77	2140	27.7922	0	0	0	0	1737.12	842	2139	1911	2129	1605	1605	1604	2062	18	29	0.990802	0.0870494	0.751828	1.51264	chr9	35269822	35269822	9p13.3	UNC13B	Parkinson's disease
CNTNAP3B	chr9	chr9:42118831-42119149	CAAAATCAAGATTTTGTATCTTGATTTGATA	31	318	10.2581	0	0	0	0	239.5	194	194	NA	NA	285	285	NA	NA	98	48	0.988544	0.339962	0.0965338	1.98198	chr9	38750582	38750582	9p13.1	FAM240B - AL845311.1	Metabolite levels (HVA/MHPG ratio)
DAPK1	chr9	chr9:87651760-87653298	CTGTGTCCTCCCACCTGATCCCGGGTCCTGATT	33	1538	46.6061	0	0	0	0	1581.75	1625	1634	1537	1338	1622	1695	1665	1538	205	105	0.984124	0.0604264	0.794051	1.47793	chr9	87646780	87646780	9q21.33	DAPK1	Blood pressure
GLRA2	chrX	chrX:14401131-14402236	ATATATATGTATC	13	1105	85	46822	0	0	0	1116.38	1112	1112	1127	1127	1103	1103	1129	1118	113	86	0.994829	0.330832	0.551995	1.82293	chrX	13912803	13912803	Xp22.2	GPM6B	Delayed reward discounting
CXorf51A	chrX	chrX:146823063-146823611	ATATACATACATATATGTATACATACACGTGTGTGTGT	38	548	14.4211	8187	0	0	0	879.625	909	909	870	870	764	764	957	994	92	95	1.00262	0.356292	0.411584	2.22268	chrX	146667390	146667390	Xq27.3	Z97180.1 - CXorf51B	Immune reponse to smallpox (secreted IFN-alpha)
AFF2	chrX	chrX:148581167-148581702	ATACGTATACGTGTACACACATATATACGT	30	535	17.8333	0	0	0	0	1173.71	1226	1226	1094	1094	NA	1166	1325	1085	30	35	1.03311	0.363033	0.434125	2.26873	chrX	148299501	148299501	Xq28	U40455.1 - RPL7L1P11	Schizophrenia
IL1RAPL1	chrX	chrX:30018153-30020457	ATATATGTT	9	2304	256	63323	0	0	0	2263.62	2329	2335	2376	2376	2091	2091	2139	2372	1057	22	0.896444	0.144253	0.538372	1.46739	chrX	30044474	30044474	Xp21.2	PIGFP3 - AC005185.1	Clostridium difficile infection in multiple myeloma
CLCN5	chrX	chrX:50057376-50057697	TCCTGGATAGATACTATCCAGGACTC	26	321	12.3462	0	0	0	0	1938.83	NA	NA	689	689	2917	2917	2534	1887	2	207	0.986852	0.33181	0.532069	1.79732	chrX	50439186	50439186	Xp11.22	DGKK	Hypospadias
ZC3H12B	chrX	chrX:65450314-65450908	TATATATGTATATATATACATATGTGTATATATGTATATGTATACATATGTG	52	594	11.4231	0	0	0	0	950.5	1038	1038	1023	1023	804	804	804	1070	16	11	0.99074	0.318962	0.517072	1.91973	chrX	65639521	65639521	Xq12	MSN	Male-pattern baldness
LOC107985675	chrX	chrX:8280586-8280904	TATATATATACACAGATG	18	318	17.6667	0	0	0	0	1089.38	1068	1068	1215	1215	984	984	996	1185	14	35	0.982383	0.343643	0.400528	1.95617	chrX	8426212	8426212	Xp22.31	VCX2 - VCX3B	Cognitive performance
MIR548M	chrX	chrX:95138986-95140525	TATATCTATATATAGATAGATAATATCTAT	30	1539	51.3	75920	0	0	0	1645.67	1630	1630	1621	1621	NA	NA	1887	1485	0	0	0.975175	0.339859	0.444056	1.83311	chrX	95824871	95824871	Xq21.33	AL365400.2 - AL137845.2	Major depressive disorder (broad)
