# Supplementary material for: Characterizing nucleotide variation and expansion dynamics in human-specific variable number tandem repeats
Source: HighWire-hosted journal article supplement (doi:10.1101/gr.275560.121), 2021-07-09
Supplement: Supplemental_Table_S2.xlsx [file Supplemental_Table_S2.xlsx]

## Sheet: Table S2 Legend
Supplemental Table 2. Composition plots showing varying patterns in 1000 Genomes Project samples.
At the top of each plot are listed the genomes from which the allele has been obtained.

## Sheet: ZFN667
Motif	Motif color	Motif size		CHM1	HG38	HG00733	HG00733	HG00268	NA19240
TGAGAAATCCACCCCCATGATCCAATCACCTCCCACAGACCCCACCTCCAACACTGAGGATTAAATTTCAACATGAGATTTGG	B	83		M	M	M	M	M	M
TGAGAAACCCACCCCCATGATCCAATCACCTCCCACAGACCCCACCTCCAACACTGAGGATTAAATTTCAACATGAGATTTGG	D	83		N	N	N	N	N	N
TGAGAAACCCACCCCCATGATCCAATCACCTCCCACAGACCCCACCTCCAACACTGAGTATTAAATTTCAACATGAGATTTGG	E	83		M	M	M	M	M	M
TGAGAAATCCACCCCCATGATCCAATCACCTCCCACCAGGCCCCACCTCCAACACTGAGGATTAAATTTCAACATGAGATTTGG	F	84		B	B	B	B	B	B
TGAGAAATCCACCCCCATGATCCAATCACCTCCAACAGACCCCACCTCCAACACTGAGGATGAAATTTCAACATGAGATTTGG	H	83		B	B	B	B	B	B
TGAGAAATCCACCCCCATGATCCAATCACCTCCCACAGACCCCACCTCCAACACCGAGGATTAAATTTCAACATGAGATTTGG	I	83		D	D	D	D	D	D
TGAGAAATCCACCCCCATGATCCAATCACCTCCCACCAGACCCCACCTCCAACACTGAGGATTAAATTTCAACATGAGATTTGG	K	84		B	B	B	B	B	B
TGAGAAATCCACCCCCATGATCCAATCACCTCCCACCAGGCCCCACCTCCAACACTGATGATTAAATTTCAACATGAGATTTGG	L	84		B	B		B	B	B
TGAGAAACCCACCCCCATGATCCAATCACCTCCCACAGACCCCACCTCCAACACTGAGGATGAAATTTCAACATGAGATTTGG	M	83		E	E		D	D	D
TGAGAAATCCACCCCCATGATCCAATCACCTCCCACCAGACCCCACCTCCAACACTGAGGATTAATTTCAACATGAGATTTGG	N	83		B	B		B	B	B
TGAGAAATCCACCCCCATGATCCAATCACCTCCCACCAGCCCCACCTCCAACACTGAGGATTAAATTTCAACATGAGATTTGG	O	83				H	H	P	H
TGAGAAATCCACCCCCATGATCCAATCACCTCCAACAGACCCCACCTCCAACACTGAGGATTAAATTTCAACATGAGATTTGG	P	83				I	I	I	I
				F	F	L	L	L
				K	K	K	K	K	K
				B	B	B	B	B	K
				F	F	F	F	F	O
				F	F	F	F	F	O
				K	K	K	K	K	K
				K	K	K	K	K	K
				B	B	B	B	B	B
				B	B	B	B	B

## Sheet: PDE4D
Motif	Motif color	Motif size		HG00733	HG38	CHM1	NA19240	HG02818	HG00514	NA12878	HG04217
TCTTTAGGATGTTCCTAAAGAAGTCTCA	B	28		B	B	B	B	B	B	B	B
				B	B	B	B	B	B	B	B
				B	B	B	B	B	B	B	B
				B	B	B	B	B	B	B	B
				B	B	B	B	B	B		B
				B	B	B	B	B	B		B
				B	B	B	B	B	B		B
				B	B	B	B	B	B		B
				B	B	B	B	B	B		B
				B	B	B	B	B	B
				B	B	B	B	B
				B		B	B
						B	B
						B	B
							B
							B
							B
							B
							B
							B
							B
							B
							B
							B
							B

## Sheet: SORL1
Motif	Motif color	Motif size		HG38	HG02059	HG00514	NA19434	HG00268	HG01352	HG04217	HG02106	HG02818	NA19240	CHM1
CATCTCCTCCTCCCCAGCTCCTCCCCTAGTGCACAGATACCTATAGGCAGGCTC	B	54		Y	Y	Y	Y	Y	Y	Y	Y	Y	Y	Y
CATCTCCTCCTCCCCAGCTCCTCCCCTAGTGCACAGATACCTATAGGCAGGCTT	D	54		D	D	D	D	D	D	D	D	D	D	D
CATCTCCTCCTCCCCAGCTCCTCCCCTAGTGCACAGATGTCTATAGGCAGGCTC	E	54		R	R	R	R	R	R		R	R	R	R
CATCTCCTCCTCCCCAGCTCCTCCCCTAGTACACAGATACCTGTAGGCAGACTC	F	54		N	N	N	N	N	N	x1	N	N	N	N
CATCTCCTCCTCCCCAGCTCCTTCCCTAGTGCACAGATACCTATAGGCAGGCTT	H	54			M	M		M	M	M	M	M		M
CATCTCCTCCTCCCCAGCTCCTCCCCTAGTACACAGATACCTATAGGCAGGCTT	I	54			U	U		U	U	U	B		U	U
CATCTCCTCCTCCCCAGCTCCTCCCCTAGTGCACAGATACCTATAAGCAAGCTC	J	54			B	B	B	B	B	B	B	B		B
CATCTCCTCCTCCCCAGCTCCTCTCCTAGTGCACAGATACCTATAGGCAAGCTC	K	54		N	N	N	N	N	N	N	N	N	N	N
CATCTCCTCCTCCCCAGCTTCTTCCATAGTGCACAGATACCTATAGGCAGGCTC	L	54		B	B	B	B	B	B	xxx	B	B	B	B
CATCTCCTCCTCCCCAGCTCCTCCCCTAGTGCACAGATACCAATAAGCAAGCTC	M	54		O	O	O	O	O	O	O	O		O	O
CATCTCCTCCTCCCCAGCTCCTCCCCTAGTGCACAGATACCTATAGGCAAGCTC	N	54		N	N	N	N	N	N	N	N	N	N	N
CATCTCTTCTTCCCCAGCTTCTTCCGTAGTGCACAGATACCTATAGGCAGGCTT	O	54		I	I	I	I	I	I	xxx	I	I	I	I
CATCTCTTCTTCCCCAGCTTCTTCCGTAGTGCACAGATACCTATAGGCAGGCTC	P	54		D	D	D	D	D	D	D	D	D	D	D
CATCTCCTCCTCCCCAGCTCCTCTCCTAGTGCACAGATACCTATAGGCAGGCTT	Q	54		F	F	F	F	F	F		F	F	F	F
CATCTCCTCCTCCCCAGCTTCTCCCCTAGTGCACAGATACCTATAGGCAGGCTC	R	54		P	P	P	P	P	P	P	P		P	P
CATCTCCTCCTCCCGAGCTCCTCCCCTAGTGCACAGATACCTATAGGCAGGCTC	S	54		K	K	K	K		K	K	K	x1	N	N
CATCTCCTCCTCCCCAGCTCCTCCCCTAGTGCACAGATACCTATCGGCAGGCTC	U	54		B	B	B	B	B	B	B	B	B	B	B
CATCTCCTCCTCCCCAGCTCCTCCCTAGTGCACAGATACCTATAGGCAGGCTT	V	53		J	J	J	J	J	J	J	J		J	J
CATCTCCCCAGCTCCTCCCCTAGTGCACAGATACCTATAGGCAGGTTC	W	48		L	L	L	L	L	L	L	L	L	L	L
CATCTCCTCCTCCTCACCTCCTGCTGTGGTGCACAGATACCTATAGGCAGGCTC	Y	54		Q	Q	Q	Q	Q	Q	Q	Q	Q	Q	Q
CATCTCCTCCTCCCAGCTCCTCCCCTAGTGCACAGATACCTATAGGCAGGCTT	Z	53		D	D	D	D	D	D	D	D	D	D	D
CATCTCCTCCTCCCCAGCTCCTCCCTAGTGCACAGATACCTATAGGCAAGCTC	x1	53		H	H	H	H	H	H	H	H	H	H	H
				D	D	D	D	D	D	D	D	V	D	D
				W	W	W	W	W	W	W	W	W	W
				D	V	V	D	D	Z	Z	D	D	D	D
				E	E	E	E	E	E	E	E	E	E	E
				D	D	Z	Z	D	D	D	D	D	D	D
				I	I		I	I	I	I	I	I	I	I
				D	D		D	D	D	D	D	V	D	D
				S			S	S	S	S	S	S	S	S

## Sheet: LOC102725191
Motif	Motif color	Motif size		HG38	HG00733	HG00733	HG00268	NA19434	HG02818	NA12878	HG02059	CHM1	HG02106
CATCTAGCTGTGTAATTGAAATGGAACATGTCAGCTTTCCTAGTATATGCTATGTGTCACTCACTTTGGTAGAAAATGC	B	79		D	D	D	D	D	D	D	D	D	D
CATCTAGCTGTGTAATTGAAATGGAACATGTCAACTTTCCTAGTATATGCTATGTGTCACTCACTTTGGTAGAAAATGC	D	79		E	E	E	E	E	E	E	E	E	E
CATCTAGCTGTGTAATTGAAATGGAACATGTCAACTTTCCTAGTATATGCTATGTGTCACTCACTTTCGTAGAAAATGC	E	79		F	F	F	F	F	F	F	F	F	F
CATCTAGCTGTGTAATTGAAATGGAACATCTCTACTTTCCTAGTATATGCTATGTGTCACTCACTTTGGTAGAAAATGC	F	79		H	H	H	H	x3	x3	x3	x3	x3	x3
CGTCTAGCTGTGTAACTGAAATGGAACATGTCTACTTTCCTAGTATATGCTATGTGTCACTCACTTTGGTAGAAAATGC	H	79		I	W	I	I	W	W	W	W	W	W
CATCTAGCTGTGTAACTGAAATGGAACATGTCAGCTTTCCTAGTATATGCTATGTGTCACTCACTATGGTAGAAAATGC	I	79			S			S	S	S	S	S	S
CACCTAGCTGTGTAATTGAAATGGAACATGTCAGCTTTCCTAGTATATGCTATGTGTCACTCACTTTGGTAGAAAATGC	J	79			Y			Y	Y	Y	Y	Y	Y
CACCTAGCTGTGTAATTGAAATGGAACATGTCAGCTTTCCTAGTATATGCTATGTGTCACTCACTATGGTAGAAAATGC	K	79			B			B	B	B	B	B	B
CACCTAGCTGTGTAATTCAAATGGAACATGTCAGCTTTCCTAGTATATGCTATGTGTCACTCACTTTGGTAGAAAATGC	L	79			K			K	K	K	K	K	K
CATCTAGCTGTGTAATTGAAATGGAACATGTCAGCTTTCCTAGTATATGCTGTGTGTCACTCACTTTGGTAGAAAATGC	M	79		J	J	J	J	J	J	J	J	J	J
CATCTAGCTGTGTAATTGAAATGGAACATATCTACTTTCCTAGTATATGCTATGTGTCACTCACTTTGATAGAAAATGC	N	79		K	K	K	K	K	K	K	K	K	K
CATCTAGTTGTGTAATTGAAATGGAACATGTCAGCTTTCCTAGTATATGCTAAGTGTCACTCACTTTGGTAGAAAATGC	O	79		L	L	L	L	J	J	J		J
CATCTAGCTGTGTAATTGAAATGGAACATGTCTACTTTCCTAGTATATGCTATGTGTCACTCACTTTCGTAGAAAATGC	P	79		M	M	M	M	x5	x5	x5		x5
CATCTAGCTGTGTAATTGAAATGGAACATATCAGCTTCCTAGTATATGCTATGTGTCACTCACTTTGATAGAAAATGC	Q	78		N	N	N	N	x6	x6	x6		x6
CATCTAGCTGTGTAATTGAAATGGAACATGTCAGCTTTCCTAGTATATGCTAAGTGTCACTCACTTTGGTAGAAAATGC	R	79						x2	x2	x2	x2	x2	x2
CATCTAGCTGTGTAATTGAAATGGAACATGTCTACTTTCCTAGTATATGCTATGTGTCACTCACTTTGGTAGAAAATGC	S	79						x4	x4	x4		x4
CATCTAGCTGTGTAATTGAAATGGAACATATCTACTTTCCTAGTATATGCTATGTGTCACTCACTTTGGTAGAAAATGC	U	79		M	M	M	M	M	M	M		M
CATCTAGCTGTGTAATTGAAATGGAAAATGTCAGCTTTCTTAGTATATGCTATGTGTCACTCACTTTGGTAGAAAATGC	V	79		O	O	O	O	R	R	R	R	R	R
CATCTAGCTGTGTAACTGAAATGGAACATGTCTACTTTCCTAGTATATGCTATGTGTCACTCACTTTGGTAGAAAATGC	W	79		B	B	B	B	B	B	B	B	B	B
CATCTAGCTGTGTAATTGAAATGGAACATGTCTACTTTCCTAGTATATGCTAAGTGTCACTCACTTTGGTAGAAAATGC	Y	79		P	P	P	P	x7	P	P	P	P	P
CATCTAGCTCTGTAATTGAAATGGAACATGTCAGCTTTCCTAGTATATGCTATGTGTCACTCACTTTGGTAGAAAATGC	X	79		B	B	B	B	B	B	B	B	B	B
CATCTAGCTGTGTAATTGAAATGGAACATATCAGCTTCCTAGTATATGCTATGTGTCACTCACTTTGATAGAAAATGC	Z	78		Q	Q	Q	Z	Z	Z	Z	Z	Z	Z
CGTCTAGCTGTGTAACTGAAATGGAACATGTCTACTTTCCTAGTATATGCTATGTGTCACTCAGTTTGGTAGAAAATGC	x1	79		R	R	R	R	R	R	R	R	R	R
CACCTAGCTGTGTAATTGAAATGGAACATGTCAGCTTTCCTAGTATATGCTGTGTGTCACTCACTTTGGTAGAAAATGC	x2	79		M	M	M	M	M	M	M	M	M	M
CGTCTAGCTGTGTAACTGAAATGGAACATGTCTACTTTCCTAGTATATGCTGTGTGTCACTCACTTTGGTAGAAAATGC	x3	79		B	X	B	B	X	X	X	X	X	X
CATCTAGCTGTGTAATTGAAATGGAACATATCTACTTTCCTAGTATATGCTATGTGTCACTCACTTTCGTAGAAAATGC	x4	79		S	S	S	S	S	S	S	S	S	S
CATCTAGCTGTGTAATTGAAATGGAACATGTCAGCTTTCCTAGTATATGCTATGTGTCACTCATTTTCGTAGAAAATGC	x5	79		U	U	U	U	U	U	U	U	U	U
CATCTGGCTGTGTAATTCAAATGGAACATGTCAGCTTTCCTAGTATATGCTATGTGTCACTCACTTTGGTAGAAAATGC	x6	79		B		B	B	B	B	B	B	B	B
CATCTAGCTGTGTAATTGAAATGGAACATGTCAGCTTTCCTAGTATATGCTATGTGTCACTCACTTTCGTAGAAAATGC	x7	79		B	B	B	B	B	B	B	B	B	B
				V	V	V	V	B	B	B	B	B	B
								B	B	B	B		B

## Sheet: PLCB4
Motif	Motif color	Motif size		HG38	CHM1	HG00733	HG00514	NA19434	HG00733	HG02818	HG00268	HG04217	NA12878	HG01352
TAGTGACATTCTGGGTTGGTTAACTGTTCATTGTGGAGGGCTGTCATA	B	48		I	I	I	I	I	I	I	I	I	I	I
CAGTGACATTCTGGGTTGGTTAACTGTTCATTGTGGAGGGCTGTCATA	D	48		B	B	B	B	B	B	B	B		B	B
TAGTGACATTCTGGGTTGGTTAAGTGTTCATTGTGGAGGGCTGTCATA	E	48					E	E	E	E	E	E	E	B
TAGTGACATTCTGGGTTGGTTAACTGTTCACTGTGGAGGGCTGTCATA	F	48					F		F	F		F	F	P
TAGTGACATTCTGGGTTGGTTAATTGTTCACTGTGGAGGGCTGTCATA	H	48					B	B	B	B	B	B	B	B
TAGTGACATTCTGGGTTGGTTAATTGTTCATTGTGGAGGGCTGTCATA	I	48					I	B	D	D	D	D	D	D
TAGTGACATTCTGGGTTGGTTAACTGTTCATTGTGGAGAGCTGTCATA	J	48					L	L	L	L	L	L	L	L
TAGTGACATTCTGGGTTGGTTAACTGTTCATTGTGGAGGGCTGTCCTA	K	48					L	L	L	L	L	L	L
CAGTGACATTCTGGGTTGGTTAATTGTTCATTGTGGAGGGCTGTCATA	L	48					M	L	L	L	L	L	L	L
CAGTGACATTCTGGGTTGGTTAAGTGTTCATTGTGGAGGGCTGTCATA	M	48					D	M	M	M	M	M	M
TAGTGACATTCTGGTTGGTTAACTGTTCATTGTGGAGGGCTGTCATA	N	47					D	M	M	M	M	M	M	M
TAGTGACATTCTGGGTTGGTTAACTGTTCATTGTGGAGGCTGTCATA	O	47						D	D	D	D	D	D	D
TAGTGACATTCTGGGTTGGTTAACTGTTCATGTGGAGGGCTGTCATA	P	47					B	M	M	D	M	M	M	M
							B	E	B	E	E	E	E
							D	B	B	B	B	O	B	N
							D	B	B	B	B	B	B	B
				D	D	D	D	P	F	F	F	F	F	P
				B	B	B	B	F	F	F	F	F	F	F
				E	E	E	E	H	H	H	H	H	H	H
				B	B	B	B		H	H	H	H	H	P
				F	F	F	F	B	B	B	B	B	B	O
				H		H	H	B	B	B	B	B	B	N
				I	I	I	I	B	B	B	B	B	B	B
				J	J	J	J	B	B	B	B	B	B	N
				B	B	B	B	B	B	B	B	B	B	B
				B	B	B	B	B	B	B	B	B	B
				K
				K	K	K	K	K	K	K	K	K	K
				B	B	B	B	I	I	I	I		I
				K	K	K	K	B	B	B	B	B	B
				I	I	I	I
				B	B	B	B
				B	B	B	B
				K	K	K	K
				I	I	I	I
				B	B	B	B

## Sheet: WDR7
Motif	Motif color	Motif size		HG38	HG00268	NA19240	HG01352	NA19434	HG02106	HG00514	HG00733	NA12878	CHM1	HG04217	HG02059	HG02818
GTTATGTCCCTTACAGGATTTCACATATCCCTATTCTCAGACAGGAATAGGGATATGTGAGCTATGATA	B	69		B	B	J	B	P	H	J	B	B	B	B	H
GTTATGTCCCTTATAGAATTTCACATATCCCTATTCTCAGGCAGGAATAGGGATATGTGAACTATGATA	D	69		P	B	D	P	x7	B	E	Q	B	D		H	H
GTTATGTCCCTTATAGAATTTCACATATCCCTATTCTCAGACAGGAATAGGGATATGTGAACTATGATA	E	69		E	P	O	F	P	O	B	F	E	B	O	x8
GTTATGTCCCTTATAGAATTTCACATATCCCTATTCTCAGACAGGAATAGGGATATGTGAGCTATGATA	F	69		B	P	x5	P	O	B	P	E	B	E		D	H
GTTATGTCCCTTACAGGATTTCACATATCCCTATTCTCAGGCAGGAATAGGGATATGTGAGCTATGATA	H	69		F	E	x1			L	B	B	L	B	H	E	D
GTTATGTCCCTTACAGGATTTCACATATCCCTATTCTCAGACAGGAATAGGGATATGTGAACTATGATA	I	69		L	B	F		F	J	B	D	P	E	E	x1	x1
GTTATGTCCCTTACAGGATTTCACATATCCCTATTCTCAGACAGGAATAGGGATATGTGACTATGATA	J	68			F	x6		x7	F	O	J	P	B	H	I	P
GTTATGTCCCTTATAGAATTTCACAAATCCCTATTCTCAGACAGGAATAGGGATATGTGAGCTATGATA	K	69			L	x6			B	O	D	F	F		E
GTTATGTCCCTTACAGGATTTCACATATCCCTATTCTCAGGCAGGAATAGGGATATGTGAACTATGATA	L	69							O	L	F	H	B	x8	E	F
GTTATGTCCCTTATAGAATTTCACATATCCCTATTCTCAGACAGGAATAGGGATATGTGAACTATGGTA	N	69							J	B		P	E	D	B	O
GTTATGTCCCTTATAGAATTTCACATATCCCTATTCTCAGACAGGAATAGGGATATGTGACTATGATA	O	68							O	O		D	B	S	I	K
GTTATGTCCCTTATAGAATTTCACATATCCCTATTCTCAGGCAGGAATAGGGATATGTGAGCTATGATA	P	69							D	J		K	I	F	B	E
GTTATGTCCCTTATAGAATTTCACAAATCCCTATTCTCAGACAGGAATAGGGATATGTGACTATGATA	Q	68							F	O		B	B	N	R	L
GTTATGTCCCTTACAGGATTTCACATATCCCTATTCTCAGACAGGAATAGGGATATGTGAACTATGGTA	R	69										D	F	B	x7
GTTATGTCCCTTACAGAATTTCACATATCCCTATTCTCAGACAGGAATAGGGATATGTGAGCTATGATA	S	69										B	B	E
GTTATGTCCCTTATAGAATTTCACAAATCCCTATTCTCAGGCAGGAATAGGGATATGTGAGCTATGATA	V	69										Q	I	B		H
GTTATGTCCCTTATAGAATTTCACATATCCCTATTCTCAGGCAGGAATAGGGATATGTGAACTATGGTA	W	69										F	B	N		x1
GTTATGTCCCTTATAGAATTTCACAAATCCCTATTCTCAGGCAGGAATAGGGATATGTGAACTATGATA	Y	69										E	R	B		D
GTTATGTCCCTTACAGGATTTCACATATCCCTATTCTCAGGCAGGAATAGGGATATGTGACTATGATA	Z	68										x2	B	E		x4
GTTATGTCCCTTATAGAATTTCACATATCCCTATTCTCAGCAGGAATAGGGATATGTGAACTATGATA	x1	68										D	F	B		x1
GTTATGTCCTTACAGGATTTCACATATCCCTATTCTCAGACAGGAATAGGGATATGTGAGCTATGATA	x2	68										J	B			F
GTTATGTCCCTTACAGGATTTCACATATCCCTATTCTCAGCAGGAATAGGGATATGTGAACTATGATA	x3	68										D	I	B		O
GTTATGTCCCTTAAGAATTTCACATATCCCTATTCTCAGGCAGGAATAGGGATATGTGAGCTATGATA	x4	68										F	B	E		K
GTTATGTCCCTTATAGAATTTCACATATCCCTATTCTCAGCAGGAATAGGGATATGTGACTATGATA	x5	67											E	B		E
GTTATGTCCCTTATAGAATTTCACATATCCCTATTCTCAGGCAGGAATAGGGATATGTGACTATGATA	x6	68											B	E		B
GTTATGTCCCTTATAGAATTTCACATATCCCTATTCTCAGGCAGGAATAGGGATACGTGACTATGATA	x7	68											D	B		E
GTTATGTCCCTTATAGAATTTCACATATCCCTATTCTCAGCAGGAATAGGGATATGTGAGCTATGATA	x8	68											B	E		B
													W	B		F
													B	E		x3
													E	B		P
													B	D		P
													D	J
													B	D
													N	F
													B
													E
													B
													N
													B
													E
													B
													E
													B
													E
													B
													E
													B
													D
													J
													D
													F

## Sheet: VPS53
Motif	Motif color	Motif size		HG00514	HG04217	CHM1	NA19434	NA19434	HG00268	HG01352	HG38	HG00733	HG02059	HG02818	NA19240	HG02106
TCACCAGTCACATATCAAATCCTGGCTCGCCCC	B	33		x3	x39	x3	x3	x3	x3	x3	x3	x3	x39	x3	x3	x3
TCACTAGTCACATATCAAATCCTGGCTTGTCCCC	D	34		x2	x2	x2	x2	x2	x2	x2	x2	x2	x38	x2	x2	x2
TCACCAGTCACATATCAAATCCTGGCTCGCCC	E	32		J	J	J	J	J	J	J	J	J	J	J	J	J
TCACTAGTCACGTATGGAATCCTGGCTCGCCCC	F	33		K	x9	K	K	K	K	K	K	K	K	K	K	K
TCACCAGTCACACATCAAATCCTGGCTCGCCCC	H	33		L	L	L	L	L	L	L	L	L	L	L	L	L
TTGCTAGTCACGTATCAAATCCTGGCCGACCCC	I	33		M	M	Mc	Mc	Mc	M	M	M	M	Mc	Mc	Mc	Mc
TCACTAGGTACATATCGAATCCTGGCTCACCCC	J	33				U	U	U		U	U	U	U	U	U	U
TCACTAGTCACATATTGAATCCTGGCTCACCCC	K	33				V	V	V		V	V	V	V	V	V	V
TCACTAGTCACATGTCAAATCCTGGCTCACCCC	L	33		W	W	W	W	W	W	W	W	W	W	W	W	W
TCACTAGTCACATATCAAATCCTGGCTGACCCC	M	33		Y	Y	Y	Y	Y	Y	Y	Y	Y	Y	Y	Y	Y
TCACTAGTCACATATCAAATCCTGGCTGACCCCC	Mc	34		Z	Z	Z	Z	Z	Z	x14	Z	Z	Z	Z	Z	Z
TCACTAGTCACATATCAAATCCTGGCTCGCCCC	N	33		F	F	F	F	F	F	F	F	F	F	F	F	F
TCACTAGTCACATATCAAATCCTGTCTCATCCC	P	33		x10	x10	x10	x10	x10	x10	x10	x10	x10	x10	x19	x19	x19
TCACTAGTCACATATCAAATCTTGGCTGACCCC	O	33		x4	x4	x4	x4	x4	x4	x4	x4	x4	x4	x4	x4	x4
TTACTAGTCACATATCGAATCCTGGCTCACCCC	Q	33		x5	x5	x5	x5	x5	x5	x5	x5	x5	x5	x5	x5	x5
TCACTAGTCACATATCAAATCCTGTCTCGCCCC	R	33		x6	x6	x6	x6	x11	x6	x6	x6	x6	x6	x6	x6	x6
TTACTAGTCCCATATGAAATCCTGGCTCACCCC	S	33		W	W	W	W	W	W	W	W		W	W	W	W
TTACTAGTCACGTATCGAATCCTGGCTGACCCCC	U	34		x7	x7	x7	x7	x7	x7	x7	x7	x7	x7	x7	x7	x7
TGACTAGTCACGTATCAAATCCTGGCTGACCCC	V	33		x8	x8	x8	x8	x8	x8	x8	x8	x8	x37	x8		x8
TTACTAGTCACATATCAAATCCTGGCTCGCCCC	W	33		B	B	B	B	B	B	B	B	B	B	H	H	H
TCAGTAGCCACATATCAAATCCTGGCTCACTCC	Y	33		x37	B	B	B	B	B	B	B	B	B	H	H	H
TCACTACTCACATATCGAATCCTGGCTCACCCC	Z	33		B	B	B	B	B	B	E	B	B	B	H	H	H
TCACTAGTCACATATCAAATCCTGGCTGGCTCACCCC	x3	37		B	B	x37	B	B	B	B	B	B	B	H	H	H
TCACTGGTCACGTATCGAATCCTGGCTCGCCCC	x4	33		B	B	B	E	B	B	B	B	B	B	H	H	H
TCACTGGTCACGTATTGAATCCTGGCTCACCCC	x5	33		B	B	B	B	B	B	B	B	B	B	H	H	B
TCACTTGTCACGTATTGAATCCTGGCTCACCCCC	x6	34		B	B	B	B	B	B	B	B	B	B	B	H	B
TCACTAGCCACATATCAAATCCTGACTGGCTAACCCC	x7	37		B	B	B	B	B	x37	E	B	B	B	B	B	B
TCACTAACCACATATCAAATCCTGACTGGCTCCACCCC	x8	38		B	B	B	B	B	E	B	B	B	B	B	B	B
TCACTGGTCACGTATCGCATCCTGGCTCGCCCC	x10	33		B	B	B	B	B	E	B	B	B	B	B	B	B
TCACTAGTCACATATCAAATCCTGGCCGACCCC	x17	33		B	B		B	B	B	x37	B	B	B	B	B	B
TTACTAGTCACATATCGAATCCTGGCTCGCCCC	x18	33		B				B	B	B	B	B	B	B	B	B
TCACTGGTCACGTATCGCATCCCGGCTCGCCCC	x19	33		B					B				O	x25	x17	x17
TTACTAGTCCCATATGAAATCCTGGCTGACCCC	x23	33		B					x28				x12	S	S
TTACTAGTCACATATCGAATCCTGGCTGACCCC	x27	33		O	E		E	O	B	E				D	D
TTACTAGTCACATATTGAATCCTGGCTGACCCC	x34	33			B			O	B					I	I
TTACTAGTCACACATCGAATCCTGGCTCACCCC	x35	33			x1									S	S
TCACTAGTCACATATCAAATCCTGGCTGGCTCACCC	x39	36		P	O	P	P	P	P	R	R	R		D	D
				O	O	O	O	O	O	O	O	O		I	I
				Q	Q	Q	Q	Q	Q	x26			Q	S	x24	S
				D	D	D	D	D	D	D			D	D	D	D
				I	I	I	I	I	I	I			I	I	I	I
				Q	Q	S	S	Q	Q					S	S	S
				D	D	D	x30	D	D					D	D	D
				I	x20	I	I	I	I					I	I	I
				Q	Q	x23		x29	Q					S	S	S
				D	D	x32		D	D					D	D	D
				I	I	x27		I	I					I	I	I
				S	S	x33		S	S					S	S
				D	x21	D		D	D					D	D
				I	x20	I		I	I					I	I
				S	S	x23		S	S					S	S
				D	D	x27		x42	D					D	D
				I	I	x35		I	I					I	I
						D								S	S
						I								D	D
						S								I	I
						x34								S	S
						I								D	D
														I	I
														S
														D
														I
				S	x22	S	S	S	S	x40	x18	x18	S	S	S	S
				D	D	D			D	TGGCTTGTCCCC	D	D	D	D	D	D
					I	I	x31		I	I	I	I	I	I	I	I
						x23	x23				x23	x23	x23	x23	x23	x23
				x27	x27			x27	x27	x27	x34	x34	x44	x27	x27	x27
				x35	x45	x35	x35	x35	x35	x43	x35	x35	x46	x35	x35	x35

## Sheet: SLC22A1
Motif	Motif color	Motif size		HG00096	HG03125	HG00733	NA12878	HG00514	HG00864	HG03683	NA18939	HG01505
GGTGCTAAGATCATGAGGTCCACTCGGGGGGGATGTGGGCATTTTCCTGGCTTTTGACTCTCCCAACAAGAGGATCTCCTCT	B	82		B	B	B	B	B	B	B	B
GGTGCTAAGATCATGAGGTCCACTCAGGGAGGGATGTGGGCATTTTCCTGGCTTTTGACTCTCCCAACAAGAGGATCTCCTCT	D	83		H	H	H	H	H	H	H	H
GGTGCTAAGATCACGAGGTCCACTCGGGGGGGATGTGGGCATTTTCCTGGCTTTTGACTCTCCCAACAAGAGGATCTCCTCT	E	82		D	D	D	D	D	D	D	D
GGTGCTAAGATCATGAGGTCCACTCGGGGGGTATGTGGGCATTTTCCTGGCTTTTGACTCTCCCAACAAGAGGATCTCCTCT	F	82		B	B	B	B	B	B	B	B
GGTGCTAAGATCATGAGGTCCACTCGGGGGGGATGTGGGCATTTTCCTGACTTTTGACTCTTCCCAACAAGAGGATCTCCTCT	H	83		E	E	E	E	E	E	E	E
GGTGCTAAGATCATGAGGTCCACTCGGGGAGGATGTGGGCATTTTCCTGGCTTTTGACTCTCCCAACAAGAGGATCTCCTCT	I	82		I	I	I	I	I	I	I	I
TCTGCTAAGATCATGAGGTCCACTCGGGGGGGATGTGGGCATTTTCCTGGCTTTTGACTCTCCCAACAAGAGGATCTCCTCT	J	82		J	J	J	J	J	J	J	J	J
GGTGCTAAGATCACGAGGTCCACTCGGGGGAGATGTGGGCATTTTCCTGGCTTTTGACTCTCCCAACAAGAGGATCTCCTCT	K	82		B	B	B	B	B	B	B	B	B
GGTGCTAAGATCATGAGGTCCACTCGGGGGGGATGTGGGCATTTTCCTGGCTTTTGACTCTCCCAACAAGAGGATCTCTTCT	L	82		Y	Y	Y	Y	Y	Y	Y	Y	Y
GGTGCTAAGATCATGAGGTCCACTTGGGGGGGATGTGGGCATTTTCCTGGCTTTTGACTCTCCCAACAAGAGGATCTCCTCT	M	82		K	K	K	K	K	K	K	K	K
GCTGCTAAGATCATGAGGTCCACTCGGGGAGGGATGTGGGCATTTTCCTGGCTTTTGACTCTCCCAACAAGAGGATCTCCTCT	N	83		V	V	V	V	V	V	V	V	V
GGTGCTAAGATCATGAGGTCCACTGGGGAGGGATGTGGGCAGTTTCCTGGCTTTTGACTCTCCCAACAAGAGGATCTCCTGT	O	82		S	S	S	S	S	S	S	S	S
GGTGCTAAGATCATGAGGTCCACTCGGGAGGGATGTGGGCATTTTCCTGGCTTTTGACTCTCCCAACAAGAGGATCTCCTCT	P	82		F	F	F	F	F	F	F	F	F
GGTGCTAAGATCATGAGGTCCACTGGGGAGGGATGTGGGCATTTTCCTGGCTTTTGACTCTCCCAACAAGAGGATCTCCTCT	Q	82		R	R	R	R	R	R	R		R
GGTGCTAAGATCACGAGGTCCACTTGGGGGGGATGTGGGCATTTTCCTGGCTTTTGACTCTCCCAACAAGAGGATCTCCTCT	R	82		N	N	N	N	N	N	N		N
GGTGCTAAGATCATGAGGTCCACTCGGGGGGGATTTGGGCATTTTCCTGGCTTTTGACTCTCCCAACAAGAGGATCTCTTCT	S	82		F	F	F	F	F	F	F		F
GGTGCTAAGATCACGAGGTCCACTCGGGGGGATGTGGGCATTTTCCTGGCTTTTGACTCTCCCAACAAGAGGATCTCCTCT	U	81		B	B	B	B	B	B	B		B
GGTGCTAAGATCATGAGGTCCACTCGGGGGGGGATGTGGGCATTTTCCTGGCTTTTGACTCTCCCAACAAGAGGATCTCCTCT	V	83		O	O	O	O	O	O	O		O
GGTGCTAAGATCATGAGGTCCACTCGGGGGGATGTGGGCATTTTCCTGACTTTTGACTCTTCCCAACAAGAGGATCTCCTCT	W	82							B	B	B	B
TCTGCTAAGATCACGAGGTCCACTCGGGGGGGATGTGGGCATTTTCCTGGCTTTTGACTCTCCCAACAAGAGGATCTCCTCT	Y	82							P	P	P	P
									D	D	D	D
									J	J	J	J
									B	B	B	B
									Y	Y	Y	Y
									K	K	K	K
												P
												D
												J
												B
												Y
												K
												V
									V	V	V	V
									S	S	S	S
									F	F	F	F
									R	R	R	R
									N	N	N	N
									F	F	F	F
									B	B	B	B
									O	O	O	O
				B	B	B	B	B	B	B	B	B
				P	P	P	P	P	P	P	P	P
				D	D	D	D	D	D	D	D	D
				Q	Q	Q	Q	Q	Q	Q	Q	Q
				B	B	B	B	B	B	B	B	B

## Sheet: PCBP3
Motif	Motif color	Motif size		HG00268	HG38	HG02059	CHM1	HG01352	HG02106	HG00733	HG00514	NA19434	HG02818	NA19240	NA19240	HG00268	HG04217	NA12878
GGTGTGCACGAGGAGATGTGAACACCGGGAACAGTCGAGTGGGTAGAAACAGCACACGTAAGATCG	B	66		J	J	J	J	J	J	H	H	H	H	H				H
GGTGTGCACGAGGAGATGCGAACACTGGGAACAGTCGCGTGGATAGAAACAGCACACGTAAGATCG	D	66		x25	x25	x25	x25	x25	x25	J	x24	x24G	x24G	x24				S
GGTGTGCGTGAGGAGATGTGAACACTGGGAACAGTCGCGTGGATAGAAACAGCACACGTAAGATCG	E	66		K	K	K	K	K	K		H	H	H	H	H	H	H	B
GGTGTGCACGAGGAGATGCGAACACCGGGAACAGTCGCGTGGATAGAAACAGCACACGTAAGATCG	F	66		J	J	J		J	J	J	I	I	I	I	I	I	I
GGTGTGCACGAGGAGATGTGAACACTGGGAACAGTCGCGTGGATAGAAACAGCACACGTAAGATCG	H	66		P	P	P		P	P	J	H	H	H	H	x15	x15	x15	x15
GGTGTGCGTGAGGAGATGCGAACACCGGGAACAGTCGAGTGGGTAGAAACAGCACACGTAAGATCG	I	66		x14	x14	x14	x14	x14	x14	J		S	S	S	N	N	N	I
GGTGTGCACGAGGAGATGCGAACACCGGGAACAGTCGAGTGGGTAGAAACAGCACACGTAAGATCG	J	66		H	H	H	H	H	H	x4		x21	x21	x21
GGTGTGCACGAGGAGATGCGAACACCGGGAACAGTCGAGTGGATAGAAACAGCACACGTAAGATCG	K	66			L	L	L	L	L	J	F	F	F	F		J	J
GGTGTGCGTGAGGAGATGCGAACACCGGGAACAGTCGCGTGGGTAGAAACAGCACACGTAAGATCG	L	66							K	J	E	E	E	E		x21		O
GGTGTGCGTGAGGAGATGCGAACACCGGGAACAGTCGTGTGGGTAGAAACAGCACACGTAAGATCG	M	66			V	V	V	V	V	H	B		B	B		N	N
GGTGTGCACGAGGAGATGTGAACACTGGGAACAGTCGCATGGATAGAAACAGCACACGTAAGATCG	N	66			W	x10	x10	x10	x10	B	H					I	x9	x9
GGTGTGCACGAGGAGATGTGAACACCGGGAACAGTCGCGTGGATAGAAACAGCACACGTAAGATCG	O	66			V	V	V	V	V	H	x23	x23	x23	x23	O	H	H	x15
GGTGTGCACGAGGAGATGTGAACACCGGGAACAGTCGAGTGGGTAGAAACAGCACACGTAAGGTCG	P	66			V	V	V	V	V	I	E	E	E	E	N	N	N
GGTGTGCACGAGGAGATGCGAACACCAGGAACAGTCGAGTGGGTAGAAACAGCACACGTAAGGTCG	Q	66			I	I	I	I	I	B	Z	Z	Z	Z	N	N	N	O
GGTGTGCGTGAGGAGATGTGAACACCGGGAACAGTCGAGTGGGTAGAAACAGCACACGTAAGATCG	S	66				I	I	I		B	E	E	E	E	I			B
GGTGTGCGTGAGGAGATGCGAACACCGGGAACAGTCGCGTGGATAGAAACAGCACACGTAAGATCG	U	66				F	F	F	F	J				Z	H		H	V
GGTGTGCGTGAGGAGATGCGAACACCGGGAACAGTCGAGTGGATAGAAACAGCACACGTAAGATCG	V	66				V	V	V	I	J				E	I		I	x15
GGTGTGCACGAGGAGATGCGAACACCGGGAACAGTCGCGTGGGTAGAAACAGCACACGTAAGATCG	W	66				x17	x17	x17	K	P	F	F	F	F	H		x8
GGTGTGCACGAGGAGATGCGAACACCGGGAACAGTCACGTGGATAGAAACAGCACACGTAAGATCG	Z	66				H	H	H	I	xxx	E	x23	E	E	U	H	H
GGTGTGCATGAGGAGATGTGAACACCGGGAACAGTCGCGTGGGTAGAAACAGCACACGTAAGATCG	x1	66				L	L	L	I		B	E	B	B	I	I	I
GGTGTGCATGAGGAGATGTGAACACCGGGAACAGTCGCGTGGATAGAAACAGCACACGTAAGATCG	x2	66				V	V	V	U		D	Z	F	D		O	x8
GGTGTGCACGAGGAGATGCGAACACCGGGAACAGTCACGTGGATAGAAACAGCACACGTAAGATCG	x3	66				W		W	K		E	H	E	E		H	H
GGTGTGCACGAGGAGATGCGAACACCGGGAACAGTCGCGTGGATAGAAACAACACACGTAAGATCG	x4	66				W	W		I		F			x4		I	x9
GGTGTGCACGAGGAGATGCGAACACCGGGAACAGTCACGTGGATAGAAACAGCACACGTAAGATCG	x5	66							W		E			E		I	I
GGTGTGCGTGAGGAGATGCAAACACTGGGAACAGTCGAGTGGATAGAAACAGCACACGTAAGGTCG	x6	66							U		x2	B		B		xxx	xxx
GGTGTGCACGAGGAGATGTGAACACCGGAACAGTCGCGTGGATAGAAACAGCACACGTAAGATCG	x8	65				J	J		J		x1	D	D	D	N	L	L
GGTGTGCGTGAGGAGATGCGAACACCGGGAACAGTCGAGTGGTAGAAACAGCACACGTAAGATCG	x9	65				I	I	I	I		E	E	E	E	N	F	K
GGTGTGCACGAGGAGATGCGAACACCGGGAACAGTCGCGTGGGTAGAAACAGCACACGTAAGATCA	x10	66				K	K	K	K		H	x4	x4	x4	D
GGTGTGCGTGAGGAGATGCGAACACCGGGAACAGTCGAGTGGGTAGAAACAGCACACGTAAGGTCG	x11	66				U	U	U	U		I	E	E	E	D
GGTGTGCACGAGGAGATGTGAACACCGGGAACGGTCGAGTGGGTAGAAACAGCACACGTAAGATCG	x12	66				K	K	K	K			x2	x2	x2	N	N	N
GGTGTGCGTGAGGAGATGCGAACACCAGGAACAGTCGAGTGGGTAGAAACAGCACACGTAAGGTCG	x13	66				I	I	I	I		x22	x23			D	D	D
GGTGTGCACGAGGAGATGTGAACACTGGGAACAGTCGCGTGGGTAGAAACAGCACACGTAAGGTCG	x14	66				K	K	K	K		O	E		x1		D	D
GGTGTGCACGAGGAGATGTGAACACCGGGAACAGTCGAGTGGATAGAAACAGCACACGTAAGATCG	x15	66				V	V	V				Z			F
GGTGTGCACGAGGAGATGTGAACACCGGGAACGTCGAGTGGGTAGAAACAGCACACGTAAGATCG	x16	65				x19	x19	x19			K	E		x1	O	O
GGTGTGCACGAGGAGATGTGAACACCGGGAACAGTCGCGTGGGTAGAAACAGCACACGTAAGGTCG	x17	66				x11	x11	x11			E	F		J	F	F	F
GGTGTGCACGAGGAGATGCGAACACCGGAACAGTCGAGTGGATAGAAACAGCACACGTAAGATCG	x18	65				x12	x12	x16			J	x23		D	F
GGTGTGCGTGAGGAGATGCGAACACCGGGAACAGTCGCGTGGATAGAAACAGCACACGTAAGGTCG	x19	66				I	I	I			I	E		H	O	O	O
GGTGTGCACGAGGAGATGTGAACACGGGAACAGTCGCGTGGATAGAAACAGCACACGTAAGATCG	x20	65				K	K	K			J	Z		D	O	O	O
GGTGTGCACGAGGAGATGTGAACACTGGGAACAGTCGCGTGGATAGAAACAGCACACGTAAGATTG	x21	66				V	V	U			V				F	F	F
GGTGTGCACGAGGAGATGTGAACACTGGGAACAGTCGAGTGGATAGAAACAGCACACGTAAGATCG	x22	66				K	K	K			V	H				F	F
GGTGTGCGTGAGGAGATGCGAACACTGGGAACAGTCGCGTGGATAGAAACAGCACACGTAAGATCG	x23	66				I	I	I			V				I	I
GGTGTGCGTGAGGAGATGCGAACACCAGGAACAGTCGAGTGGGTAGAAACAGCACACGTAAGATCG	x24	66				J	J				x16	I					F
GGTGTGCACGAGGAGATGCGAACACCGGGAACAGTCGAGTGGGTAGAAACAGCACACGTAAGATCA	x25	66				I	I	I			M	D
						K	K	K			xxx
						U	U	U			M						B
						K	K	K			J				D	D	D
								I			D				H
						K	K	K			I
						V	V		V
						V	V				H	H	H	H	H			I
					V	V	V	V	V	H	H	H	H	H	H	H	H
					x12	x12	x12		x12		I	I	H	I		H	H	I
					M	M	M	M	M		J	J	J	J		J	J	J
					P	P	P	P	P	xxx	x6		x6	x6	x6	x6	x6
				M	M	M	M	M	M	Q	Q	Q	Q	Q	Q	Q	Q	Q
								F	I
				J	J	J	J	I	J
					L	L	L		L
				x13	x13	x13	x13	x13	x11
